# Supplementary material
Source: publisher figshare collection journal article supplement (https://acs.figshare.com/ndownloader/files/3842794)

*Supporting information for*

**Phase-vanishing Method with Acetylene Evolution and Its Utilization  
in Several Organic Syntheses**

Ryosuke Matake, Yuki Niwa, Hiroshi Matsubara\*

*Department of Chemistry, Graduate School of Science, Osaka Prefecture University, Sakai, Osaka  
599-8531, Japan*

E-mail: matsu@c.s.osakafu-u.ac.jp

**Table of Contents**

|                                                                                                                     |     |
|---------------------------------------------------------------------------------------------------------------------|-----|
| I. General Remarks .....                                                                                            | S2  |
| II. Materials .....                                                                                                 | S2  |
| III. General Procedure for the Preparation of Azides <b>3a-h</b> .....                                              | S2  |
| IV. Typical Procedure for Sonogashira coupling by the Phase-vanishing Method.....                                   | S3  |
| V. Typical Procedure for Copper-catalyzed Azide-Alkyne Cycloaddition (CuAAC) by the<br>Phase-vanishing Method ..... | S3  |
| VI. Typical Procedure for Aldehyde-Alkyne-Amine Coupling ( $A^3$ -coupling) by the<br>Phase-vanishing Method .....  | S4  |
| VII. Spectroscopic Data.....                                                                                        | S5  |
| VIII. References .....                                                                                              | S10 |
| IX. NMR Spectra.....                                                                                                | S11 |

## I. General Remarks

Melting points were obtained with Yanako micro melting point apparatus and are not corrected. Products were purified by column chromatography on silica gel (Kanto Chemical Co., Inc., Silica Gel 60N (spherical, neutral), 63-210 mm).  $^1\text{H}$  NMR spectra were recorded with a JEOL-ECP-500 (500 MHz) and a JEOL-ECS-400 (400 MHz) spectrometer in  $\text{CDCl}_3$ . Chemical shifts were reported in parts per million ( $\delta$ ) referenced to the solvent peak at 7.26 ppm.  $^{13}\text{C}$  NMR spectra were recorded with a JEOL-ECP-500 (126 MHz) and a JEOL-ECS-400 (100 MHz) spectrometer in  $\text{CDCl}_3$  and referenced to the solvent peak at 77.0 ppm. Coupling constants,  $J$ , were reported in Hertz (Hz), and splitting patterns were designated as s (singlet), d (doublet), t (triplet), q (quartet), quint (quintet) and m (multiplet). IR spectra were obtained on a JASCO FT/IR-4100 spectrometer; absorptions were reported in reciprocal centimeters. Conventional mass spectra were recorded with a SHIMADZU GCMS-QP2010Plus spectrometer and high-resolution mass spectra were recorded with a JEOL MS-700 spectrometer.

## II. Materials

Benzyl azides (**3a-3h**) were prepared according to procedures (Methods A–C) in literature. The other compounds were purchased from commercially available sources and used without further purification.

## III. General Procedures for the Preparation of Azides 3a–h

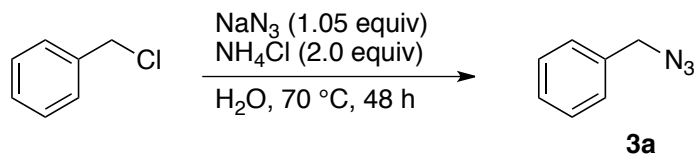

**Method A**<sup>S1</sup>: Benzyl chloride (10 mmol) was suspended in water at a concentration of 1.5 M. To the suspension, sodium azide (10.6 mmol) and ammonium chloride (20 mmol) were added, and the mixture was heated at  $70\text{ }^\circ\text{C}$  for 48 h with vigorous stirring. After cooling, the mixture was extracted with diethyl ether, and collected organic layer was dried over sodium sulfate. After filtration, evaporation of the solvent yielded pure benzyl azide.

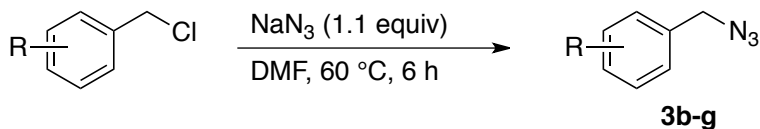

**Method B**<sup>S2</sup>: A mixture of substituted benzyl chloride (10 mmol) and sodium azide (11 mmol) in DMF (5 mL) was gradually heated to  $60\text{ }^\circ\text{C}$  and stirred for 6 h. After cooling, diethyl ether and water were added to the reaction mixture. The organic layer was separated and the aqueous layer was extracted with diethyl ether. The combined organic layers were washed with water and brine, and dried over sodium sulfate. After filtration, evaporation of the solvent yielded the analytically pure substituted azidomethylbenzenes.

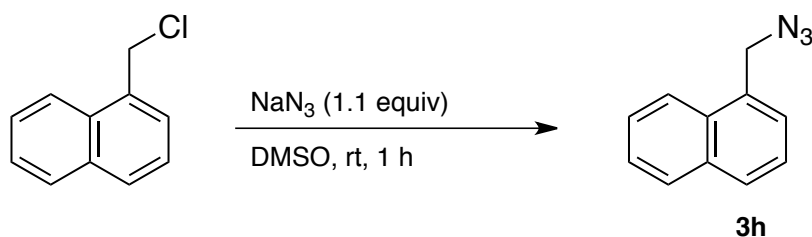

**Method C<sup>S3</sup>.** To a solution of sodium azide (11 mmol) in DMSO (5 mL), 1-(chloromethyl)naphthalene (10 mmol) was added, and the mixture was stirred at room temperature for 1 h. After checking that the starting material (chloromethylnaphthalene) was consumed, the reaction was quenched with water and allowed to cool to room temperature with stirring. The mixture was then extracted with ethyl acetate. The collected organic layer was washed with water and brine, and dried over sodium sulfate. After filtration, the solvent was evaporated and the residue was purified by column chromatography on silica gel to afford 1-(azidomethyl)naphthalene.

#### IV. Typical Procedure for Sonogashira Coupling by the Phase-vanishing Method (Table 1, entry 1)

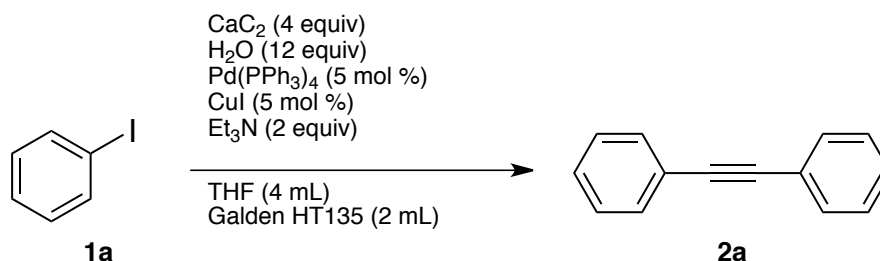

Calcium carbide (512 mg, 8.0 mmol) and a magnetic stirring bar (oval, 10 mm × 5 mm) were placed in a Pyrex test tube (15 mm  $\phi$  × 130 mm), to which Galden HT135 (2 mL) was added slowly using a syringe. Subsequently, water (420 mg, 23.3 mmol), a solution of phenyl iodide (408 mg, 2.0 mmol) in THF (4 mL), Pd(PPh<sub>3</sub>)<sub>4</sub> (115 mg, 0.10 mmol), CuI (24 mg, 0.13 mmol), and triethylamine (409 mg, 4.0 mmol) were added slowly in order, forming four layers. A rubber septum was fitted to the test tube, and a needle equipped with a balloon, which acted as a reservoir of acetylene gas during the reaction, was then pricked into the septum. The air in the test tube was removed by a syringe until the balloon was completely flattened. The test tube was heated in an oil bath at 55 °C for 20 h with slow stirring, taking care not to mix the layers, then allowed to cool to ambient temperature. After removal of the Galden HT135 by glass pipette, the organic layer and inorganic salts were moved to a separatory funnel using diethyl ether and water. The organic layer was separated, and the aqueous layer was extracted with diethyl ether. The combined organic layers were then dried over sodium sulfate, filtered, and concentrated. Purification by column chromatography on silica gel with hexane gave diphenylacetylene as white crystalline solid (165 mg, 94%).

**V. Typical Procedure for Copper-catalyzed Azide-Alkyne Cycloaddition (CuAAC) by the Phase-vanishing Method (Table 2, entry 1)**

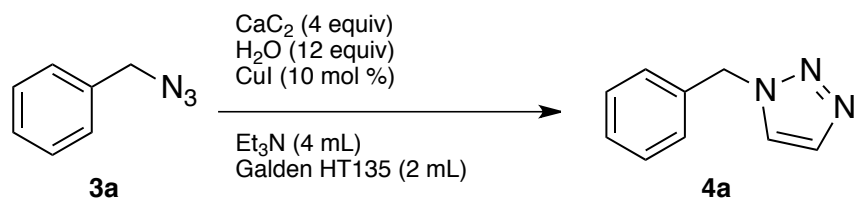

Calcium carbide (259 mg, 4.0 mmol) and a magnetic stirring bar (oval, 10 mm  $\times$  5 mm) were placed at bottom of a Pyrex test tube (15 mm  $\phi$   $\times$  130 mm), to which Galden HT135 (2 mL) was added slowly using a syringe. Subsequently, water (300 mg, 16.6 mmol), a solution of benzyl azide (132 mg, 1.0 mmol) in triethylamine (4 mL), and  $\text{CuI}$  (20 mg, 0.11 mmol) were added slowly in order, forming four layers. A rubber septum was fitted to the test tube, and a needle equipped with a balloon, which acted as a reservoir of acetylene gas during the reaction, was then pricked into the septum. The air in the test tube was removed by a syringe until the balloon was completely flattened. The test tube was heated in an oil bath at 55  $^\circ\text{C}$  for 20 h with slow stirring, taking care not to mix the layers, and then allowed to cool to ambient temperature. The organic layer was taken up with a glass pipette. Ethyl acetate was placed on the residual Galden HT135 layer, and then decanted. The collected organic layer was mixed with hydrochloric acid (2 M). After checking that the pH was less than 7 with pH indicator paper, the layers were separated, and the aqueous layer was extracted with ethyl acetate. The combined organic layers were dried over sodium sulfate, filtered, and concentrated. Purification by column chromatography on silica gel with hexane–ethyl acetate (1:1) gave 1-benzyl-1H-1,2,3-triazole as pale yellow crystalline solid (137 mg, 85%).

**VI. Typical Procedure for Aldehyde-Alkyne-Amine Coupling ( $\text{A}^3$ -coupling) by the Phase-vanishing Method (Table 3, entry 1)**

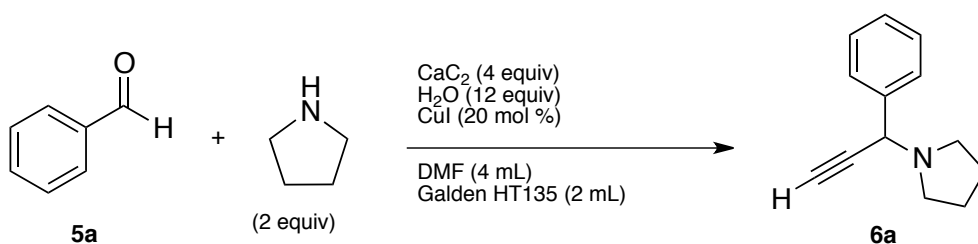

Calcium carbide (259 mg, 4.0 mmol) and a magnetic stirring bar (oval, 10 mm  $\times$  5 mm) were placed in a Pyrex test tube (15 mm  $\phi$   $\times$  130 mm), to which Galden HT135 (2 mL) was added slowly using a syringe. Subsequently, water (250 mg, 13.9 mmol), a solution of benzaldehyde (**1a**) (110 mg, 1.0 mmol) in DMF (4 mL), pyrrolidine (147 mg, 2.1 mmol), and  $\text{CuI}$  (40 mg, 0.21 mmol) were added slowly in order, forming four layers. A rubber septum was fitted to the test tube, and a needle equipped with a balloon, which acted as a reservoir of acetylene gas during the reaction, was then pricked into the septum. The air in the test tube was removed by a syringe until the balloon was completely flattened. The test tube was heated in an oil bath at

55 °C for 20 h with slow stirring, taking care not to mix the layers, and then allowed to cool to ambient temperature. After removal of the Galden HT135 by glass pipette, the organic layer and inorganic salts were moved to a separatory funnel using diethyl ether and water. The organic layer was separated, and the aqueous layer was extracted with diethyl ether. The combined organic layers were then dried over sodium sulfate, filtered, and concentrated. Purification by a column chromatography on silica gel with hexane-ethyl acetate (4/1) gave 1-(1-phenylprop-2-ynyl)pyrrolidine (**6a**) as reddish yellow oil (144 mg, 75%).

## VII. Spectroscopic Data

### Diphenyl acetylene (**2a**)<sup>S4</sup>:

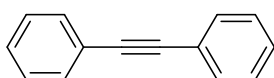

White crystalline solid (165 mg); <sup>1</sup>H NMR (400 MHz, CDCl<sub>3</sub>): δ 7.56–7.53 (m, 4H), 7.38–7.33 (m, 6H); <sup>13</sup>C NMR (126 MHz, CDCl<sub>3</sub>): δ 131.50, 128.23, 128.14, 123.16, 89.26.

### 1,2-Bis(4-methoxyphenyl)acetylene (**2b**)<sup>S4</sup>:

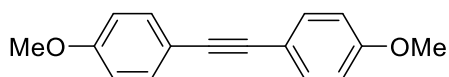

Yellow crystalline solid (186 mg); <sup>1</sup>H NMR (400 MHz, CDCl<sub>3</sub>): δ 7.45 (d, *J* = 8.0 Hz, 4H), 6.87 (d, *J* = 8.0 Hz, 4H), 3.83 (s, 6H); <sup>13</sup>C NMR (100 MHz, CDCl<sub>3</sub>): δ 159.32, 132.81, 115.65, 113.91, 87.90, 55.21.

### Bis(p-tolyl)acetylene (**2c**)<sup>S4</sup>:

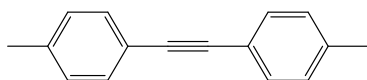

Pale yellow crystalline solid (196 mg); <sup>1</sup>H NMR (500 MHz, CDCl<sub>3</sub>): δ 7.41 (d, *J* = 8.3 Hz, 4H), 7.15 (d, *J* = 8.3 Hz, 4H), 2.36 (s, 6H); <sup>13</sup>C NMR (126 MHz, CDCl<sub>3</sub>): δ 138.15, 131.41, 129.07, 120.37, 88.85, 21.48.

### 1,2-Bis(4-fluorophenyl)acetylene (**2d**)<sup>S4</sup>:

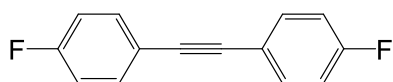

Pale yellow crystalline solid (208 mg); <sup>1</sup>H NMR (500 MHz, CDCl<sub>3</sub>): δ 7.50 (dt, *J* = 8.7, 3.2 Hz, 4H), 7.05 (t, *J* = 8.7 Hz, 4H); <sup>13</sup>C NMR (126 MHz, CDCl<sub>3</sub>): δ 162.33 (d, *J*<sub>C-F</sub> = 251 Hz), 133.23 (d, *J*<sub>C-F</sub> = 8.6 Hz), 119.00, 115.53 (d, *J*<sub>C-F</sub> = 22.1 Hz), 87.84.

### 1,2-Bis(4-(trifluoromethyl)phenyl)acetylene (**2e**)<sup>S4</sup>:

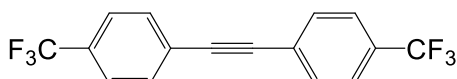

Greenish pale yellow crystalline solid (302 mg); <sup>1</sup>H NMR

(500 MHz, CDCl<sub>3</sub>):  $\delta$  7.67–7.62 (m, 8H); <sup>13</sup>C NMR (100 MHz, CDCl<sub>3</sub>):  $\delta$  131.96, 130.46 (q,  $J_{\text{C-F}} = 32.8$  Hz), 126.36, 125.37 (broad d,  $J_{\text{C-F}} = 2.9$  Hz), 123.84 (q,  $J_{\text{C-F}} = 271.6$  Hz), 90.11.

**Benzyl azide (3a)<sup>S5</sup>:**

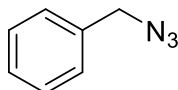

Pale yellow oil (1.15 g); <sup>1</sup>H NMR (400 MHz, CDCl<sub>3</sub>):  $\delta$  7.42–7.26 (m, 5H), 4.34 (s, 2H); <sup>13</sup>C NMR (100 MHz, CDCl<sub>3</sub>):  $\delta$  135.23, 128.69, 128.12, 128.05, 54.56.

**1-(Azidomethyl)-4-methylbenzene (3b)<sup>S2</sup>:**

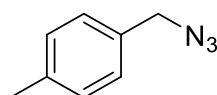

Pale yellow oil (646 mg); <sup>1</sup>H NMR (400 MHz, CDCl<sub>3</sub>):  $\delta$  7.22–7.20 (m, 4H), 4.29 (s, 2H), 2.36 (s, 3H); <sup>13</sup>C NMR (100 MHz, CDCl<sub>3</sub>):  $\delta$  138.15, 132.26, 129.50, 128.27, 54.56, 21.18.

**1-(Azidomethyl)-2-methylbenzene (3c)<sup>S6</sup>:**

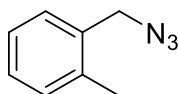

Pale yellow oil (617 mg); <sup>1</sup>H NMR (400 MHz, CDCl<sub>3</sub>):  $\delta$  7.27–7.21 (m, 4H), 4.35 (s, 2H), 2.37 (s, 3H); <sup>13</sup>C NMR (100 MHz, CDCl<sub>3</sub>):  $\delta$  136.77, 133.37, 130.64, 129.31, 128.62, 126.20, 53.03, 18.96.

**1-(Azidomethyl)-4-chlorobenzene (3d)<sup>S2</sup>:**

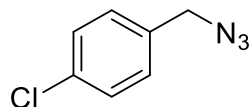

Pale yellow oil (799 mg); <sup>1</sup>H NMR (400 MHz, CDCl<sub>3</sub>):  $\delta$  7.38–7.34 (m, 2H), 7.27–7.24 (m, 2H), 4.32 (s, 2H); <sup>13</sup>C NMR (100 MHz, CDCl<sub>3</sub>):  $\delta$  134.21, 133.84, 129.49, 129.02, 54.02.

**1-(Azidomethyl)-4-chlorobenzene (3e)<sup>S2</sup>:**

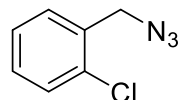

Pale yellow liquid (801 mg); <sup>1</sup>H NMR (400 MHz, CDCl<sub>3</sub>):  $\delta$  7.44–7.39 (m, 2H), 7.32–7.26 (m, 2H), 4.50 (s, 2H); <sup>13</sup>C NMR (100 MHz, CDCl<sub>3</sub>):  $\delta$  133.77, 133.28, 130.00, 129.78, 129.64, 127.15, 52.26.

**1-(Azidomethyl)-4-methoxybenzene (3f)<sup>S2</sup>:**

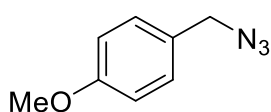

Pale red oil (791 mg); <sup>1</sup>H NMR (400 MHz, CDCl<sub>3</sub>):  $\delta$  7.25 (d,  $J = 8.0$  Hz, 2H), 6.91 (d,  $J = 8.0$  Hz, 2H), 4.27 (s, 2H), 3.82 (s, 3H); <sup>13</sup>C NMR (100 MHz, CDCl<sub>3</sub>):  $\delta$  159.61, 129.74, 127.37, 114.16, 55.24, 54.35.

**1-(Azidomethyl)-4-trifluoromethylbenzene (3g)<sup>S5</sup>:**

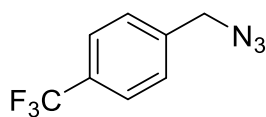

Yellow oil (976 mg);  $^1\text{H}$  NMR (400 MHz,  $\text{CDCl}_3$ ):  $\delta$  7.65 (d,  $J$  = 8.0 Hz, 2H), 7.45 (d,  $J$  = 8.0 Hz, 2H), 4.43 (s, 2H);  $^{13}\text{C}$  NMR (100 MHz,  $\text{CDCl}_3$ ):  $\delta$  139.41, 130.43 (q,  $J_{\text{C-F}}$  = 32.4 Hz), 128.24, 125.78 (q,  $J_{\text{C-F}}$  = 3.8 Hz), 123.95 (q,  $J_{\text{C-F}}$  = 269 Hz), 54.04.

**1-(Azidomethyl)naphthalene (3h)<sup>S3</sup>:**

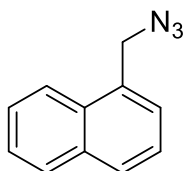

Pale yellow oil (1.75 g);  $^1\text{H}$  NMR (400 MHz,  $\text{CDCl}_3$ ):  $\delta$  8.03 (d,  $J$  = 8.0 Hz, 1H), 7.91–7.87 (m, 2H), 7.59–7.46 (m, 4H), 4.77 (s, 2H);  $^{13}\text{C}$  NMR (100 MHz,  $\text{CDCl}_3$ ):  $\delta$  133.73, 131.18, 130.81, 129.25, 128.66, 127.08, 126.57, 126.00, 125.06, 123.33, 52.76.

**1-Benzyl-1H-1,2,3-triazole (4a)<sup>S7</sup>:**

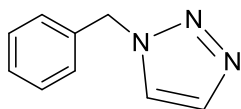

Pale yellow crystalline solid (137 mg);  $^1\text{H}$  NMR (400 MHz,  $\text{CDCl}_3$ ):  $\delta$  7.71 (s, 1H), 7.47 (s, 1H), 7.47–7.35 (m, 3H), 7.28–7.25 (m, 2H), 5.57 (s, 2H);  $^{13}\text{C}$  NMR (100 MHz,  $\text{CDCl}_3$ ):  $\delta$  134.66, 134.23, 129.09, 128.71, 127.98, 123.26, 53.94.

**1-(4-Methylbenzyl)-1H-1,2,3-triazole (4b)<sup>S7</sup>:**

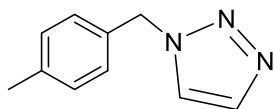

White crystalline solid (101 mg);  $^1\text{H}$  NMR (400 MHz,  $\text{CDCl}_3$ ):  $\delta$  7.69 (s, 1H), 7.47 (s, 1H), 7.17 (m, 4H), 5.52 (s, 2H), 2.35 (s, 3H);  $^{13}\text{C}$  NMR (100 MHz,  $\text{CDCl}_3$ ):  $\delta$  138.15, 133.72, 131.46, 129.35, 127.68, 123.12, 53.29, 20.77.

**1-(2-Methylbenzyl)-1H-1,2,3-triazole (4c)<sup>S7</sup>:**

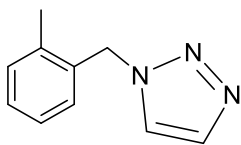

Light brown crystalline solid (100 mg);  $^1\text{H}$  NMR (400 MHz,  $\text{CDCl}_3$ ):  $\delta$  7.69 (s, 1H), 7.35 (s, 1H), 7.30–7.13 (m, 4H), 5.58 (s, 2H), 2.78 (s, 3H);  $^{13}\text{C}$  NMR (100 MHz,  $\text{CDCl}_3$ ):  $\delta$  136.49, 133.63, 132.38, 130.64, 128.93, 128.72, 126.30, 123.08, 51.74, 18.61.

**1-(4-Chlorobenzyl)-1H-1,2,3-triazole (4d)<sup>S7</sup>:**

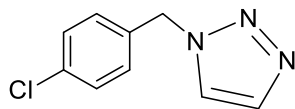

Light brown crystalline solid (170 mg);  $^1\text{H}$  NMR (400 MHz,  $\text{CDCl}_3$ ):  $\delta$  7.73 (s, 1H), 7.48 (s, 1H), 7.37–7.34 (m, 2H), 7.22–7.19 (m, 2H), 5.54 (s, 2H);  $^{13}\text{C}$  NMR (100 MHz,  $\text{CDCl}_3$ ):  $\delta$  134.31, 134.02, 133.11, 129.08, 128.95, 123.33, 52.84.

**1-(2-Chlorobenzyl)-1H-1,2,3-triazole (4e)<sup>S7</sup>:**

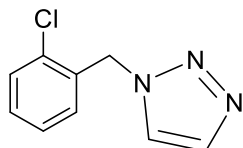

Light brown crystalline solid (162 mg); <sup>1</sup>H NMR (400 MHz, CDCl<sub>3</sub>): δ 7.73 (s, 1H), 7.59 (s, 1H), 7.45–7.43 (m, 1H), 7.32–7.27 (m, 2H), 7.18–7.15 (m, 1H), 5.71 (s, 2H); <sup>13</sup>C NMR (100 MHz, CDCl<sub>3</sub>): δ 133.82, 133.14, 132.31, 129.97×2, 129.62, 127.34, 123.67, 50.97.

**1-(4-Methoxybenzyl)-1H-1,2,3-triazole (4f)<sup>S7</sup>:**

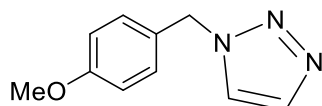

Light brown crystalline solid (157 mg); <sup>1</sup>H NMR (400 MHz, CDCl<sub>3</sub>): δ 7.69 (s, 1H), 7.43 (s, 1H), 7.23 (d, *J* = 8.4 Hz, 2H), 6.91–6.89 (m, 2H), 5.50 (s, 2H), 3.81 (s, 3H); <sup>13</sup>C NMR (100 MHz, CDCl<sub>3</sub>): δ 159.0, 133.73, 129.27, 126.46, 123.00, 114.08, 54.99, 53.08.

**1-(4-Trifluoromethylbenzyl)-1H-1,2,3-triazole (4g):**

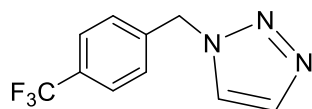

Light brown crystalline solid (168 mg); mp 52.5–53.0 °C; <sup>1</sup>H NMR (400 MHz, CDCl<sub>3</sub>): δ 7.76 (s, 1H), 7.64 (d, *J* = 8.0 Hz, 2H), 7.52 (s, 1H), 7.36 (d, *J* = 8.0 Hz, 2H), 5.64 (s, 2H); <sup>13</sup>C NMR (100 MHz, CDCl<sub>3</sub>): δ 138.68, 134.16, 130.51 (q, *J*<sub>C-F</sub> = 32.5 Hz), 127.91, 125.76 (d, *J*<sub>C-F</sub> = 4.0 Hz), 123.65, 123.60 (q, *J*<sub>C-F</sub> = 270.2 Hz), 52.93; IR (KBr): 2965, 2927, 2857, 2812, 2076, 1444, 1123 883, 747 cm<sup>-1</sup>; GC-MS (EI): 227 (5), 198 (47), 172 (19), 159 (100), 130 (58), 109 (62), 40 (21 %); HRMS (EI) Calcd. For C<sub>10</sub>H<sub>8</sub>N<sub>3</sub>F<sub>3</sub>: 227.0670, Found: 227.0672.

**1-(1-Naphthylmethyl)-1H-1,2,3-triazole (4h)<sup>S8</sup>:**

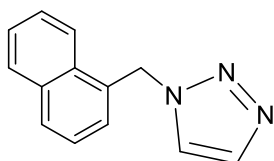

Off-white crystalline solid (185 mg); <sup>1</sup>H NMR (400 MHz, CDCl<sub>3</sub>): δ 7.97–7.89 (m, 3H), 7.65 (s, 1H), 7.54–7.34 (m, 4H), 7.26 (s, 1H), 6.03 (s, 2H); <sup>13</sup>C NMR (100 MHz, CDCl<sub>3</sub>): δ 133.76, 133.59, 130.82, 129.66, 128.65, 127.44, 126.93, 126.10, 125.11, 123.20, 122.6, 51.72.

**1-(1-phenylprop-2-ynyl)pyrrolidine (6a)<sup>S9</sup>:**

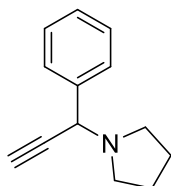

Reddish yellow oil (144 mg); <sup>1</sup>H NMR (400 MHz, CDCl<sub>3</sub>): δ 7.54 (d, *J* = 3.6 Hz, 2H), 7.36–7.28 (m, 3H), 4.68 (d, *J* = 1.2 Hz, 1H), 2.61 (t, *J* = 6.8 Hz, 4 H), 2.48 (d, *J* = 1.2 Hz, 1H), 1.79–1.76 (m, 4H); <sup>13</sup>C NMR (100 MHz, CDCl<sub>3</sub>): δ 138.95, 128.22, 128.08, 127.58, 80.76, 74.52, 58.33, 50.01, 23.38.



**1-(1-(4-Methoxyphenyl)prop-2-ynyl)pyrrolidine (6b)<sup>S10</sup>:**

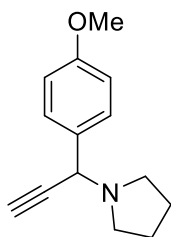

Reddish yellow oil (89 mg); <sup>1</sup>H NMR (400 MHz, CDCl<sub>3</sub>): δ 7.45 (d, *J* = 8.8 Hz, 2H), 6.87 (d, *J* = 8.4 Hz), 4.61 (d, *J* = 2.0 Hz, 1H), 3.81 (s, 3H), 2.61-2.57 (m, 4H), 2.46 (d, *J* = 2.4 Hz, 1H), 1.77-1.75 (m, 4H); <sup>13</sup>C NMR (100 MHz, CDCl<sub>3</sub>): δ 158.93, 131.14, 129.11, 113.45, 81.03, 74.23, 57.64, 55.14, 49.91, 23.30.

**1-(1-(4-Methylphenyl)prop-2-ynyl)pyrrolidine (6d):**

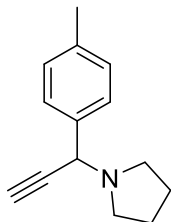

Reddish yellow oil (93 mg); <sup>1</sup>H NMR (400 MHz, CDCl<sub>3</sub>): δ 7.42 (d, *J* = 8.0 Hz, 2H), 7.15 (d, *J* = 8.0 Hz, 2H), 4.63 (d, *J* = 2.0 Hz, 1H), 2.60 (t, *J* = 7.2 Hz, 4H), 2.46 (d, *J* = 2.4 Hz, 1H), 2.34 (s, 3H), 1.78–1.75 (m, 4H); <sup>13</sup>C NMR (100 MHz, CDCl<sub>3</sub>): δ 137.20, 136.01, 128.88, 127.96, 81.03, 74.24, 58.07, 50.02, 23.35, 21.07; IR (neat): 3297, 2966, 2875, 2813, 1511, 1267 cm<sup>-1</sup>; GC-MS (EI): 199 (29), 129 (100), 108 (79), 70 (40 %); HRMS (EI) Calcd. For C<sub>14</sub>H<sub>17</sub>N: 199.1361, Found: 199.1357.

**1-(1-(2,5-Dimethylphenyl)prop-2-ynyl)pyrrolidine (6e):**

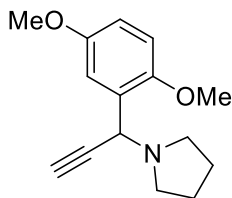

Reddish yellow oil (95 mg); <sup>1</sup>H NMR (400 MHz, CDCl<sub>3</sub>): δ 7.20 (d, *J* = 2.4 Hz, 1H), 6.81–6.79 (m, 2H), 5.07 (d, *J* = 2.0 Hz, 1H), 3.81–3.79 (d, *J* = 1.2 Hz, 3H×2), 2.67 (s, 4H), 2.37 (d, *J* = 2.4 Hz, 1H), 1.78–1.77 (m, 4H); <sup>13</sup>C NMR (100 MHz, CDCl<sub>3</sub>): δ 153.32, 150.77, 128.32, 115.32, 113.31, 112.06, 81.80, 72.96, 56.37, 55.63, 51.09, 50.32, 23.26; IR (neat): 3286, 2962, 2833, 1499, 1464, 1279, 1246, 1216 cm<sup>-1</sup>; GC-MS (EI): 245 (23), 216 (21), 175 (100), 161 (49), 132 (44), 108 (99), 91 (43), 70 (94 %); HRMS (EI) Calcd. For C<sub>15</sub>H<sub>19</sub>NO<sub>2</sub>: 245.1416, Found: 245.1412.

**1-(1-ethynyl-cyclohexyl)-pyrrolidine (6f):**

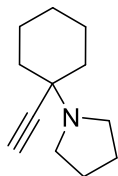

Light brown crystalline solid (55 mg); mp 62.5–63.5 °C; <sup>1</sup>H NMR (400 MHz, CDCl<sub>3</sub>): δ 2.73–2.70 (m, 4H), 2.28 (s, 1H), 1.94 (d, *J* = 12.4 Hz, 2H), 1.78 (quint, *J* = 3.6 Hz, 4 H), 1.67–1.46 (m, 8H); <sup>13</sup>C NMR (100 MHz, CDCl<sub>3</sub>): δ 84.48, 72.98, 58.63, 46.78, 37.71, 25.55, 23.35, 22.74; IR (KBr): 3127, 2420, 1623, 1424, 1325, 1217, 1167, 1136, 1107, 1065, 830, 798 cm<sup>-1</sup>; GC-MS (EI): 177 (11), 162 (18), 148 (21), 134 (100), 120 (21), 79 (10), 70 (26), 65 (10), 41 (10 %); HRMS (EI) Calcd. For C<sub>12</sub>H<sub>19</sub>N: 177.1517, Found: 177.1520.

## VIII. References

- S1 Maisoniai, A.; Serafin, P.; Traïkia, M.; Debiton, E.; Théry, V.; Aitken, D. J.; Lemoine, P.; Viossat, B.; Gautier, A. *Eur. J. Inorg. Chem.* **2008**, 2, 298.
- S2 Hédou, D.; Deau, E.; Dubouilh-Benard, C.; Sanselme, M.; Martinet, M.; Chosson, E.; Levacher, V.; Besson, T. *Eur. J. Org. Chem.* **2013**, 33, 7533.
- S3 Suzuki, T.; Ota, Y.; Ri, M.; Bando, M.; Gotoh, A.; Itoh, Y.; Tsumoto, H.; Tatum, P. R.; Mizukami, T.; Nakagawa, H.; Iida, S.; Ueda, R.; Shirahige, K.; Miyata, N. *J. Med. Chem.* **2012**, 55, 9562.
- S4 Mio, M. J.; Kopel, L. C.; Braun, J. B.; Gadzikwa, T. L.; Hull, K. L.; Brisbois, R. G.; Markworth, C. J.; Grieco, P. A. *Org. Lett.* **2002**, 4, 3199.
- S5 Stefely, J. A.; Palchaudhuri, R.; Miller, P. A.; Peterson, R. J.; Moraski, G. C.; Hergenrother, P. J.; Miller, M. J. *J. Med. Chem.* **2010**, 53, 3389.
- S6 Liu, M.; Reiser, O. *Org. Lett.* **2011**, 13, 1102.
- S7 Wu, L. Y.; Xie, Y. X.; Chen, Z. S.; Niu, Y. N.; Liang, Y. M. *Synlett* **2009**, 1453.
- S8 Ikemoto, T.; Ito, T.; Tomimatsu, K.; Sawai, Y.; Nishiyama, H.; Isogami, Y. PCT Int. Appl. WO 2002006, 2002.
- S9 Lin, Z.; Yu, D.; Sum, Y. N.; Zhang, Y. *ChemSusChem* **2012**, 5, 625.
- S10 Lee, A. S.-Y.; Chen, G.-A.; Chang, Y.-T.; Chu, S.-F. *Synlett* **2009**, 441.

## IX. NMR Spectra

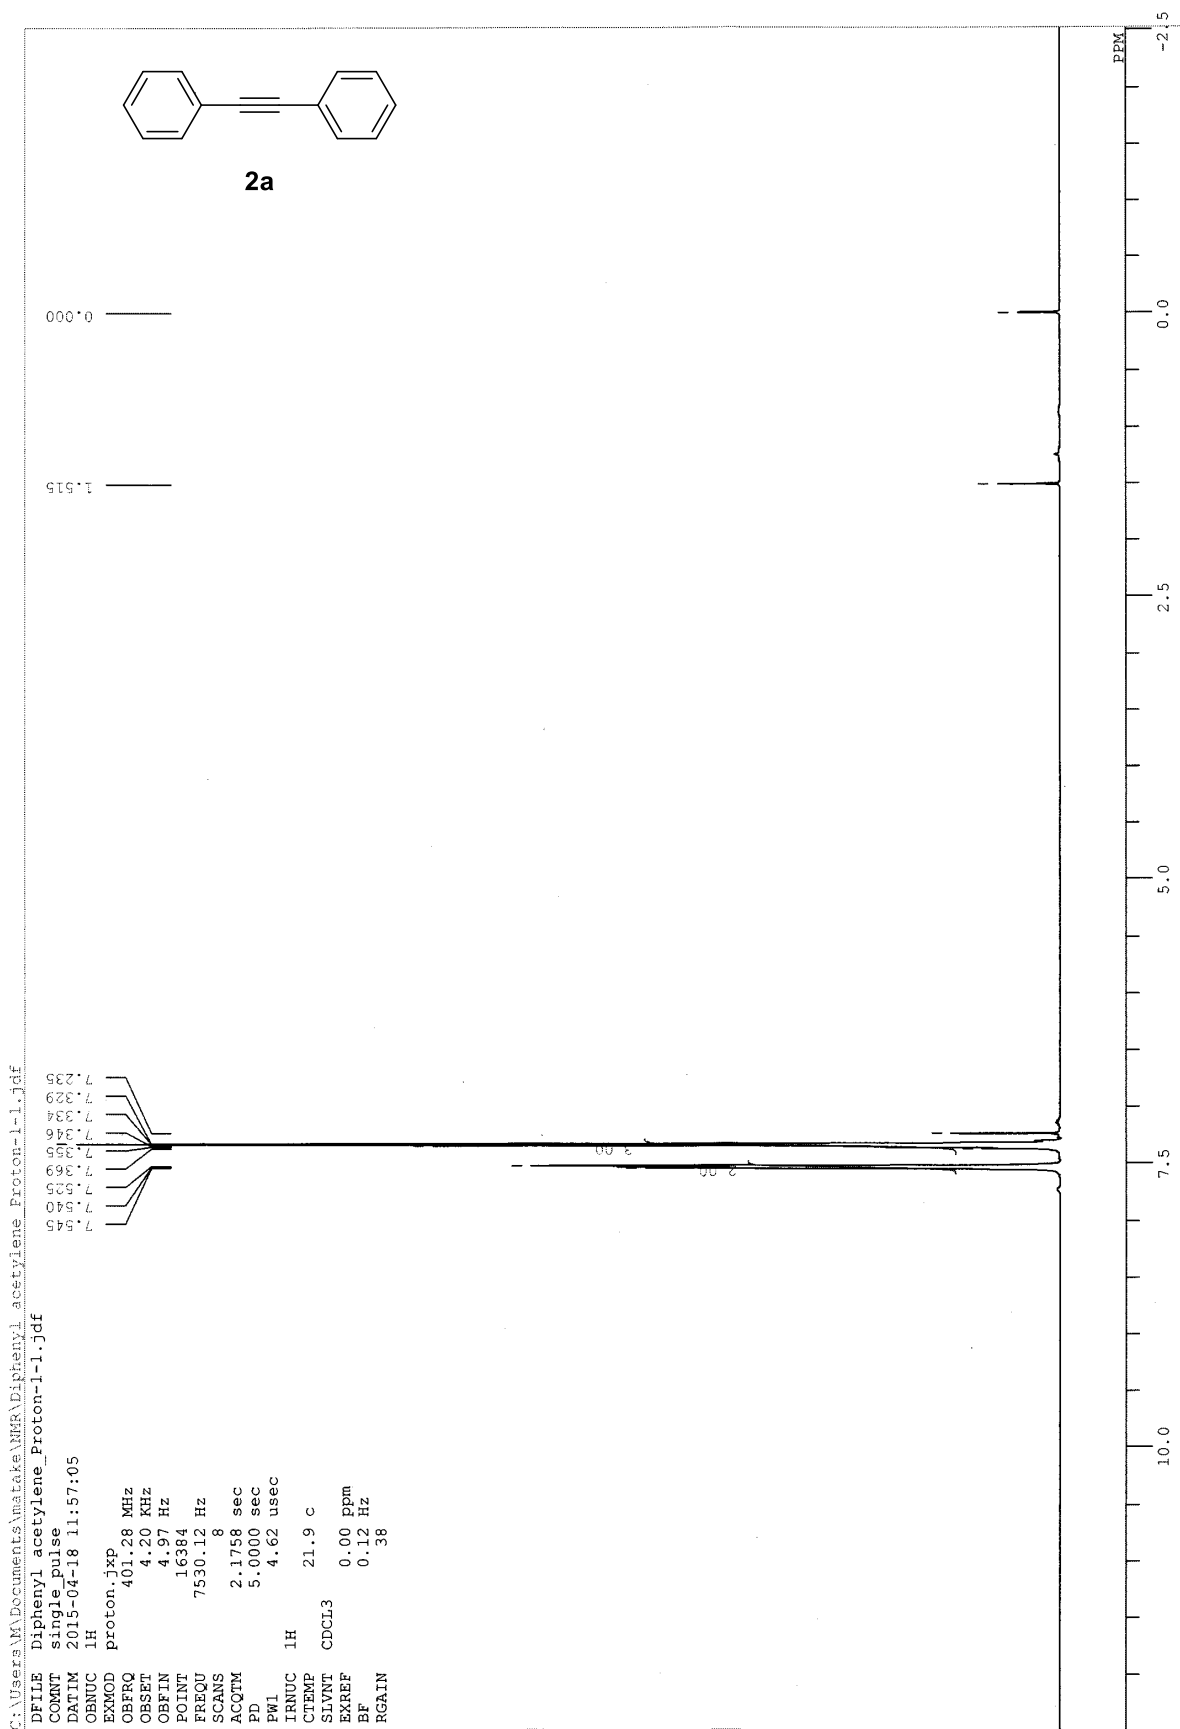

----- PROCESSING PARAMETERS -----  
Acq. File : 51022  
F2 : 1  
Machine : JEOL  
Sample : 2a  
Reference : 77.000 [ppm]  
Acquisition : 77.000 [ppm]  
-----

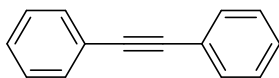

2a

----- ACQUISITION PARAMETERS -----  
File Name : 51022 Spectrum 37  
Author :  
Sample ID : diphenylacetylene  
Date : 15-MAR-2010 10:11:13  
Creation Date : 15-MAR-2010 10:11:13  
Revision Date : 15-MAR-2010 10:11:13  
Spec File : 51022  
Spec Type : 1D  
Data Format : 1D  
Dimensions : 1D  
Data Size : 136  
Data Units : [ppm]  
Scans : 256  
X-Axis : 136  
X-Offset : 100 [ppm]  
X-Scale : 15.7473579 [Hz]  
X-Group : 15.7473579 [Hz]  
Solvent : CDCl3  
Spin Set : 31 [Hz]  
Spin Mod : 30 [Hz]  
Recvr Gain : 11.7473579 [V]  
Field Strength : 125.7606221 [MHz]  
Filter Mod : 15.7473579 [Hz]  
Filter Width : 15.7473579 [Hz]  
-----

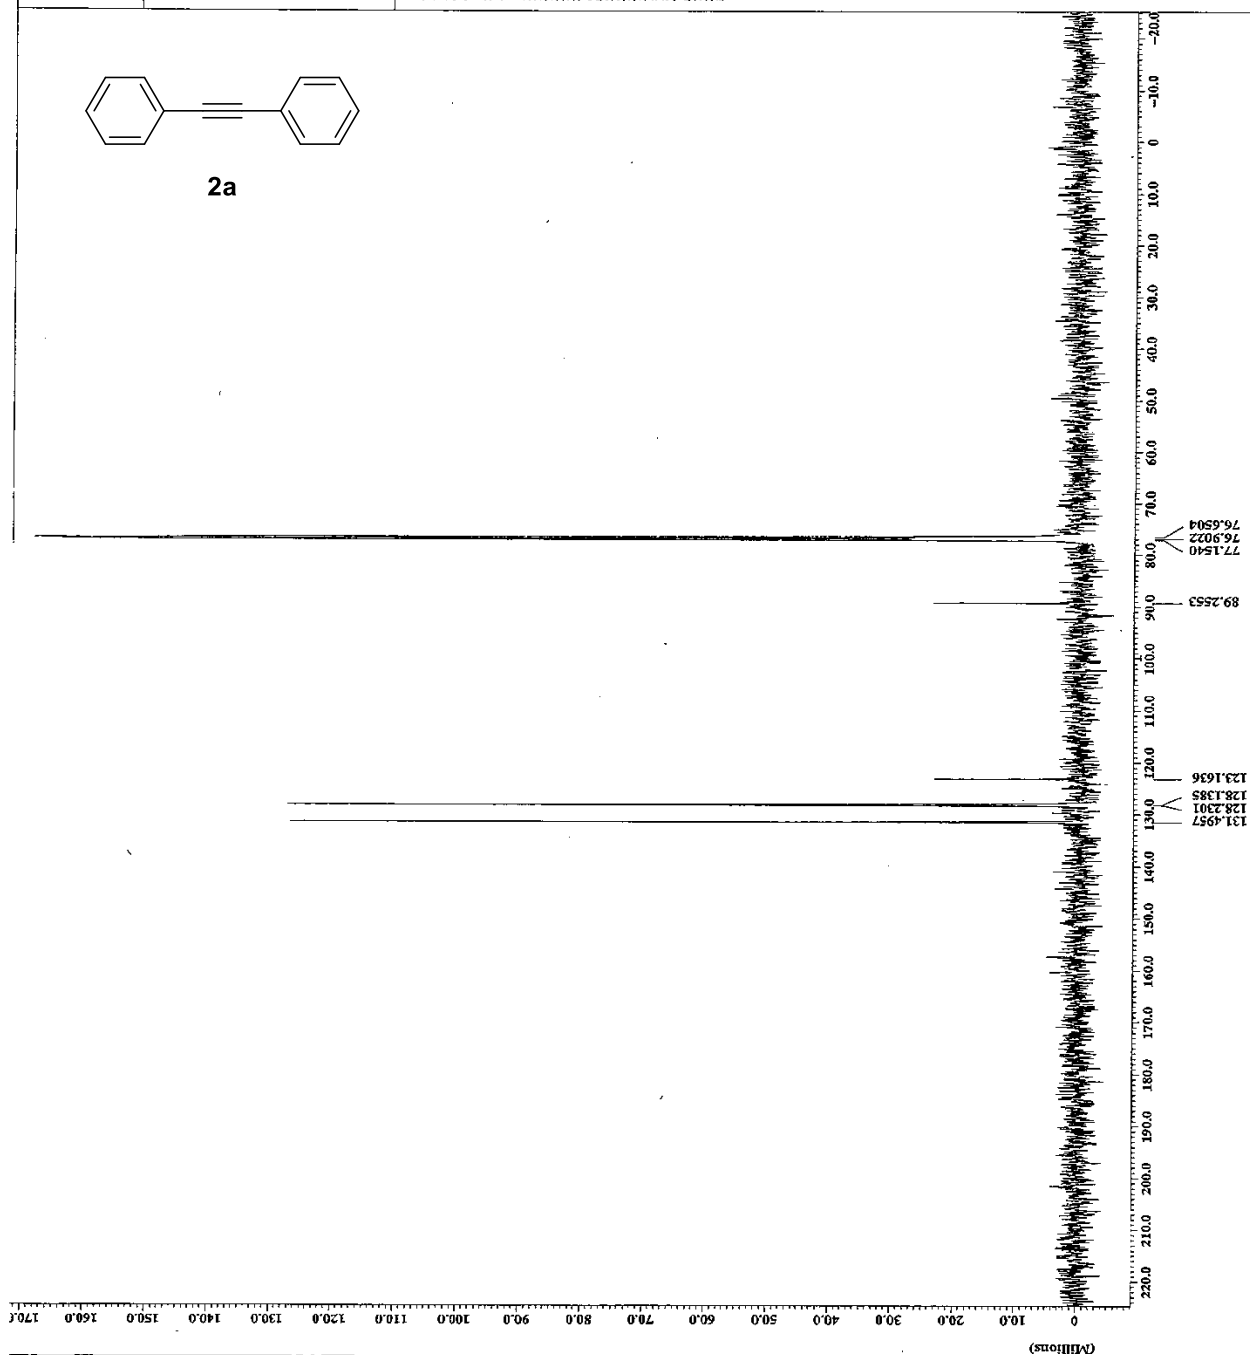



C:\Users\A\Documents\NMR\MTK110-1 Carbon-1-1.jdf

DFIL MTK110-1 Carbon-1-1.jdf  
 COMNT single pulse decoupled gated NOE  
 DATIM 2014-08-15 15:28:18  
 OBNUC 13C  
 EXMOD carbon.jxp  
 OBFRQ 100.91 MHz  
 OBSET 2.56 KHz  
 OBFIN 8.88 Hz  
 POINT 32767  
 FREQU 31565.66 Hz  
 SCANS 256  
 ACQTM 1.0381 sec  
 PD 2.0000 sec  
 PW1 2.92 usec  
 IRNUC 1H  
 CTEMP 22.4 C  
 SLVNT CDCL3  
 EXREF 77.00 ppm  
 BF 1.20 Hz  
 RGAIN 50

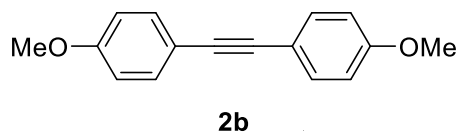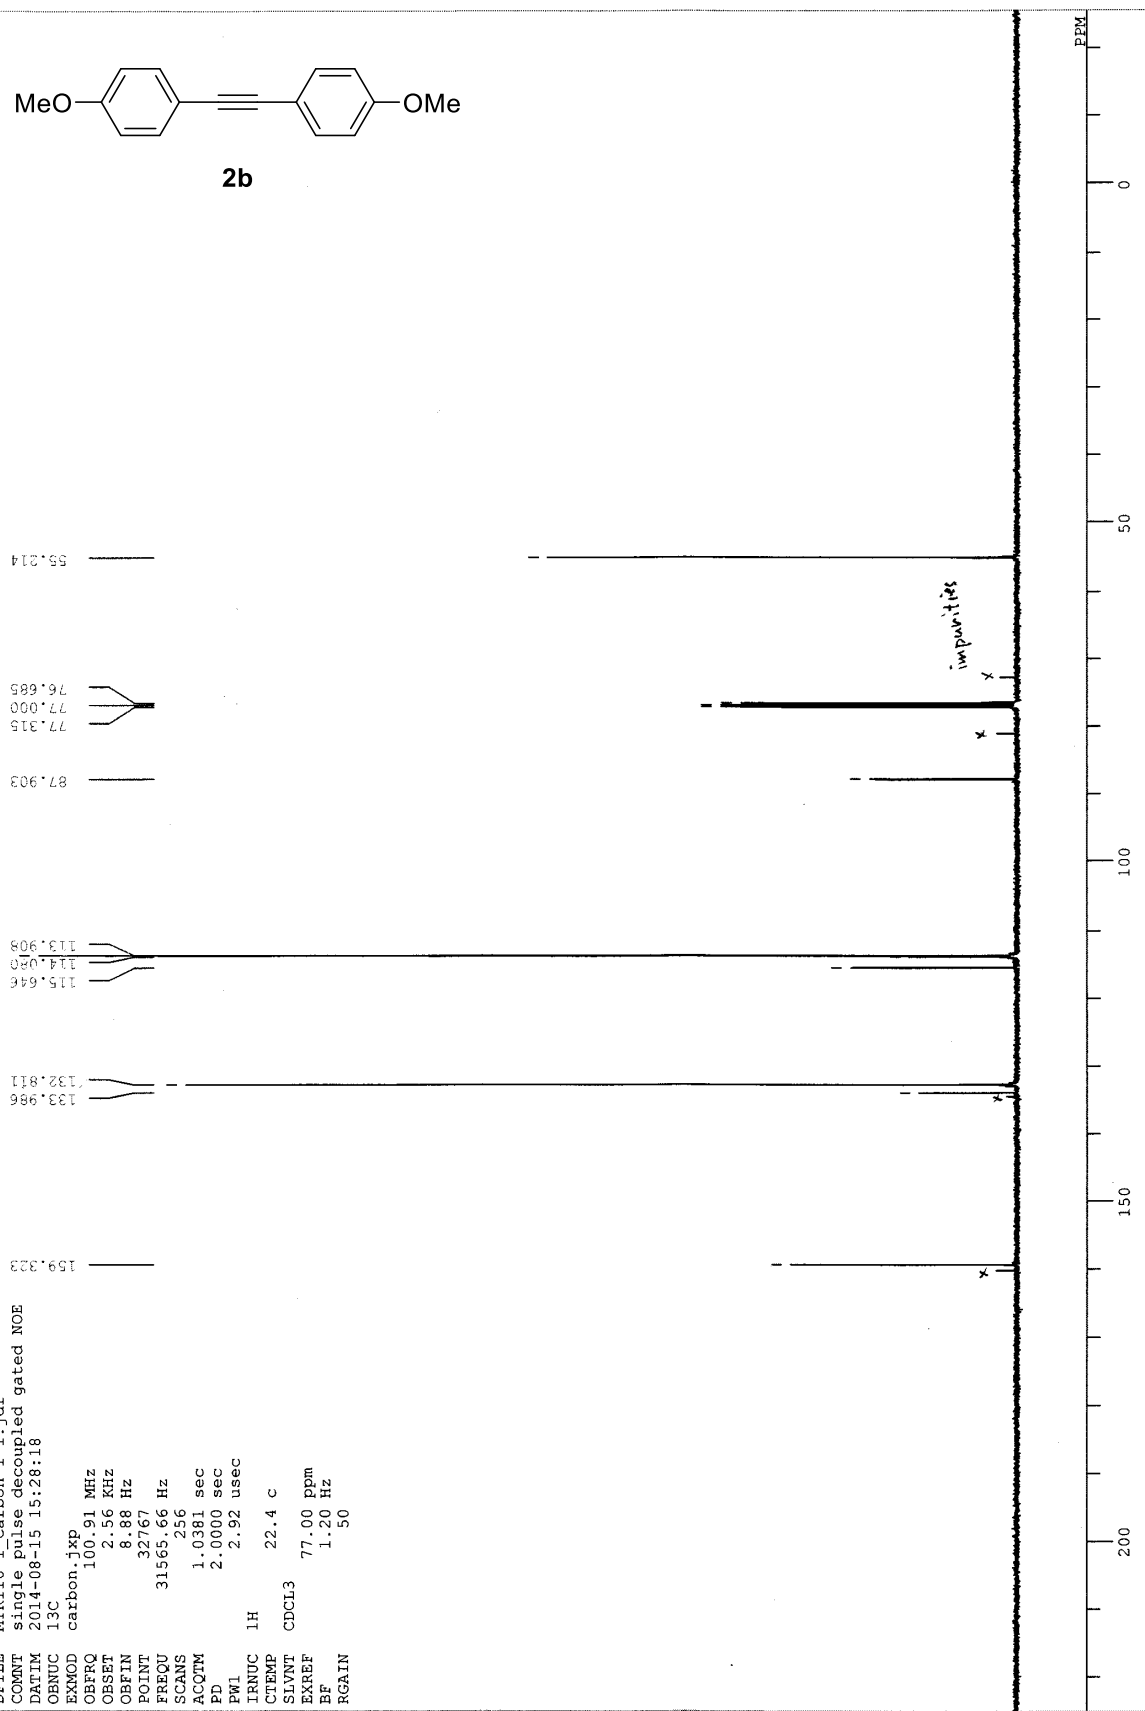

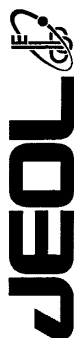

----- PROCESSING PARAMETERS -----  
dc\_balance = 0.0 [Hz]  
freq = 500.13 [MHz]  
f2 = 1  
machinename =  
reference = 7.255 [ppm] : 7.26 [ppm]

----- ACQUISITION PARAMETERS -----  
File Name = id\_spectrum.185  
Sample = methyl  
Content = Single Pulse Experiment  
Creation Date = 15-MAR-2010 10:17:20  
Revision Date = 17-MAR-2010 19:37:39  
Spec Site = ECP500  
Spec Type = DELTA\_NMR  
Data Format = 1D COMPLEX  
Dimensions = 1  
Dim Size = 16384  
Dim Units = [ppm]  
Mod Return = 1  
X\_domain = 1H  
X\_freq = 500.13241602 [MHz]  
X\_sweep = 7.50750751 [kHz]  
SOLVENT = CDCl3  
Split = 1  
Temp\_set = 21.4 [°C]  
Nuc1\_gain = 15  
Nuc1\_freq = 74.8375 [Hz]  
Filter\_mode = BUTTERWORTH  
Filter\_width = 3.75119936 [kHz]

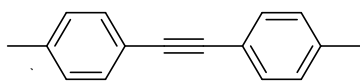

2c

x in purities

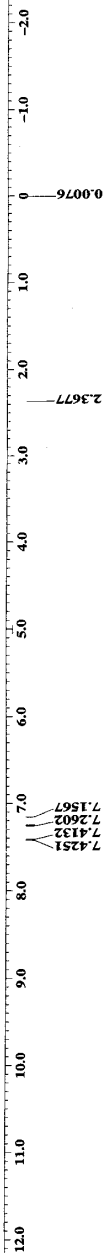

X : parts per Million : 1H





----- PROCESSING PARAMETERS -----  
dc\_balance  
freq : 0.2 [Hz]  
machinphase  
Pyr  
reference : 7.262 [ppm] : 7.26 [ppm]  
reference : 7.26 [ppm] : 7.26 [ppm]

----- ACQUISITION PARAMETERS -----  
File Name : 1d\_spectrum.186  
Author :  
Sample ID :  
Content : Single Pulse Experiment  
Creation Date : 15-MAR-2010 10:31:54  
Revision Date : 17-MAR-2010 19:42:12  
Spec Site : ECP500  
Spec Type : DELTA 500  
Data Format : 1D COMPLEX  
Dimensions :  
Dim 1 Size : 16384  
Dim 2 Size : 8  
Dim Units : [ppm]  
Scales :  
X\_domain : 1H  
X\_offset : 5 [ppm]  
X\_sweep : 2.50750751 [kHz]  
X\_resolution : 2.50750751 [kHz]  
Solvent : CHLOROFORM-D  
Spin\_set : 31 [14C]  
Recvr\_gain : 15  
Field\_strength : 11.743379 [T]  
P1 : 12.00 [sec]  
Pulse\_width : 3.7515936 [kHz]

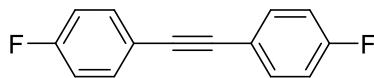

2d

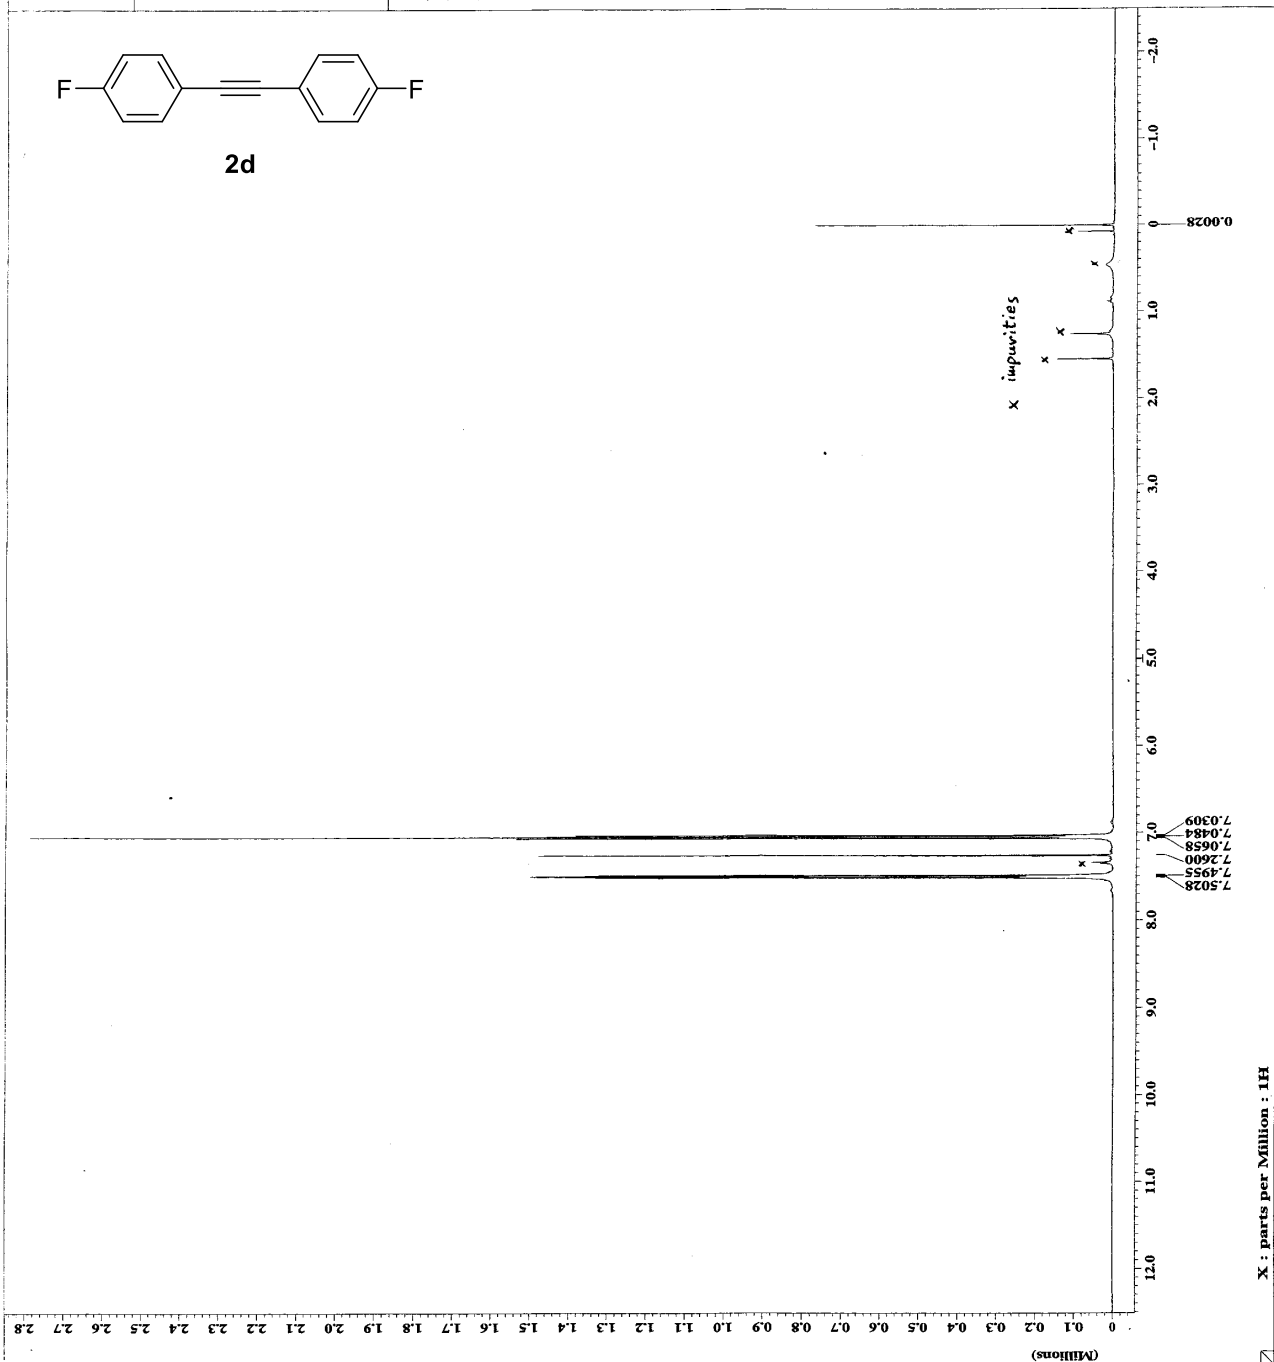

X : parts per Million : 1H

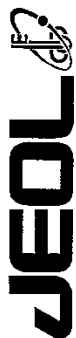

----- PROCESSING PARAMETERS -----  
dc balance  
freq : 5 [Hz]  
p1 : 1  
p2 : 1  
machineshape  
reference : 77.031 [ppm] : 77 [ppm]

----- ACQUISITION PARAMETERS -----  
File Name = 1a\_13c\_spectrum\_41  
Author =  
Sample ID = 410000  
Sample = 100%  
Constant = 15-MAR-2010 10:40:23  
Creation Date = 15-MAR-2010 10:40:23  
Revision Date = 15-MAR-2010 10:40:23  
Spec file = 410000  
Spec type = 1D  
Data Format = 1D  
Dimensions = 1  
Time = 1  
Date = 15-MAR-2010 10:40:23  
Time Units = [ppm]  
Acq. Mode = 1  
X\_gain = 1  
X\_offset = 1  
X\_resolution = 1  
X\_sweep = 1  
SOLVENT = CDCl3  
Pulse Program = zgpg30  
Pulse Length = 12.00 [ms]  
Pulse Width = 15.7286221 [ms]  
Filter Width = 15.7286221 [ms]

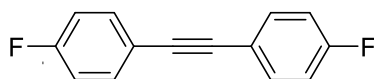

2d

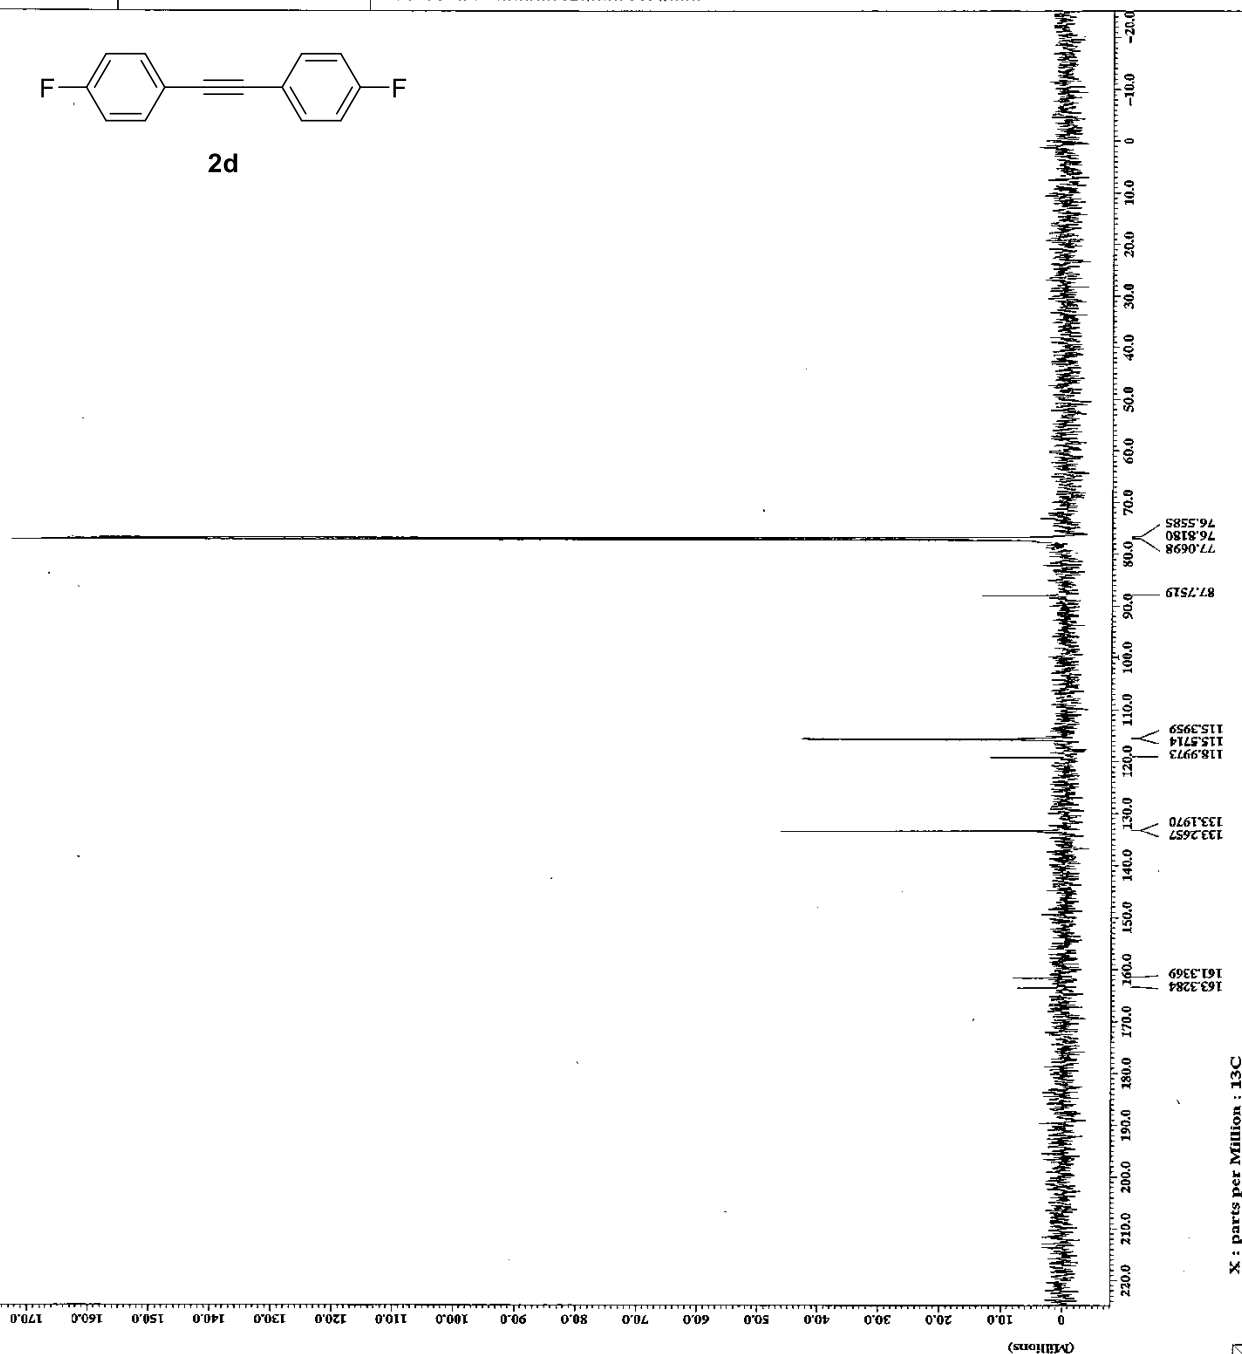

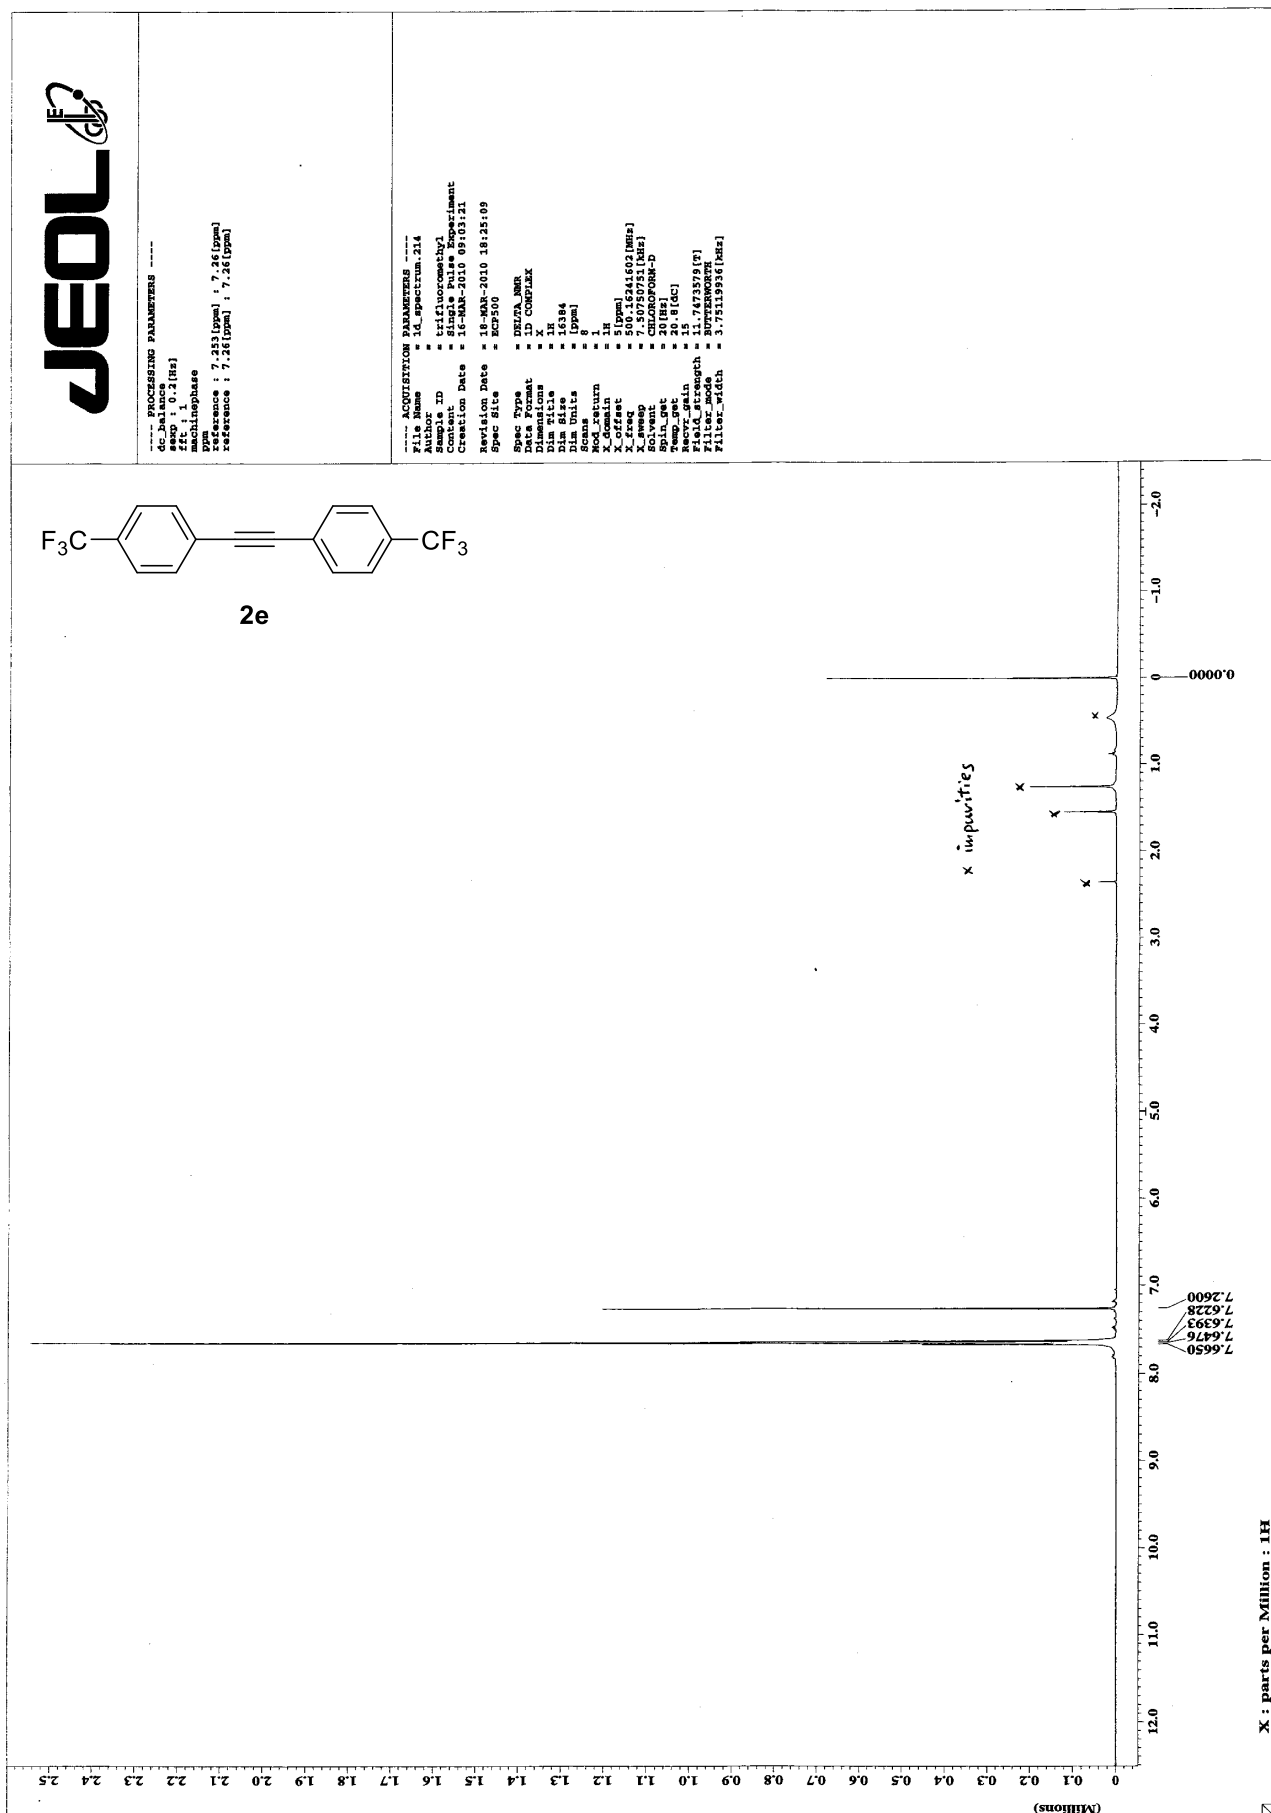

C:\Users\A\Documents\anatake\NMR\CF3-acetylene-2 Carbon-1-L-1.jdf

CF3-acetylene-2 Carbon-1-L-1.jdf  
 COMNT single pulse decoupled gated NOE  
 DATIM 2015-03-04 12:24:04

13C  
 OBNUC carbon.jxp  
 EXMOD 100.91 MHz  
 OBFRQ 2.56 KHz  
 OBSET 8.88 Hz  
 OBFIN 32767  
 POINT 31565.66 Hz  
 SCANS 1024  
 ACQTM 1.0381 sec  
 PD 2.0000 sec  
 PW1 2.92 usec  
 IRNUC 1H  
 CTEMP 19.9 c  
 SIVNT CDCL3  
 EXREF 77.00 ppm  
 BF 1.20 Hz  
 RGAIN 50

131.962  
 130.950  
 130.625  
 130.300  
 129.976  
 127.885  
 126.358  
 125.384  
 125.355  
 125.183  
 122.491  
 119.789  
 90.108  
 77.315  
 77.000  
 76.685

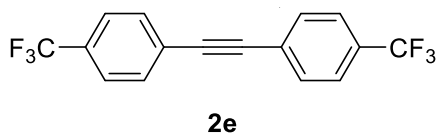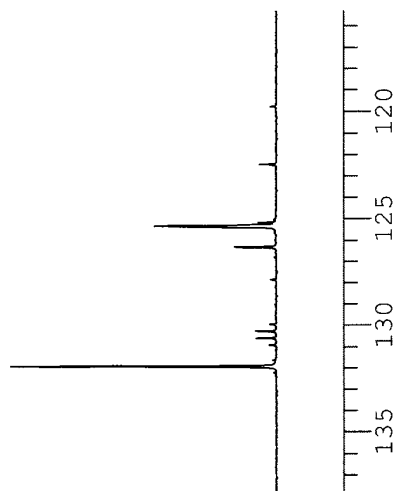

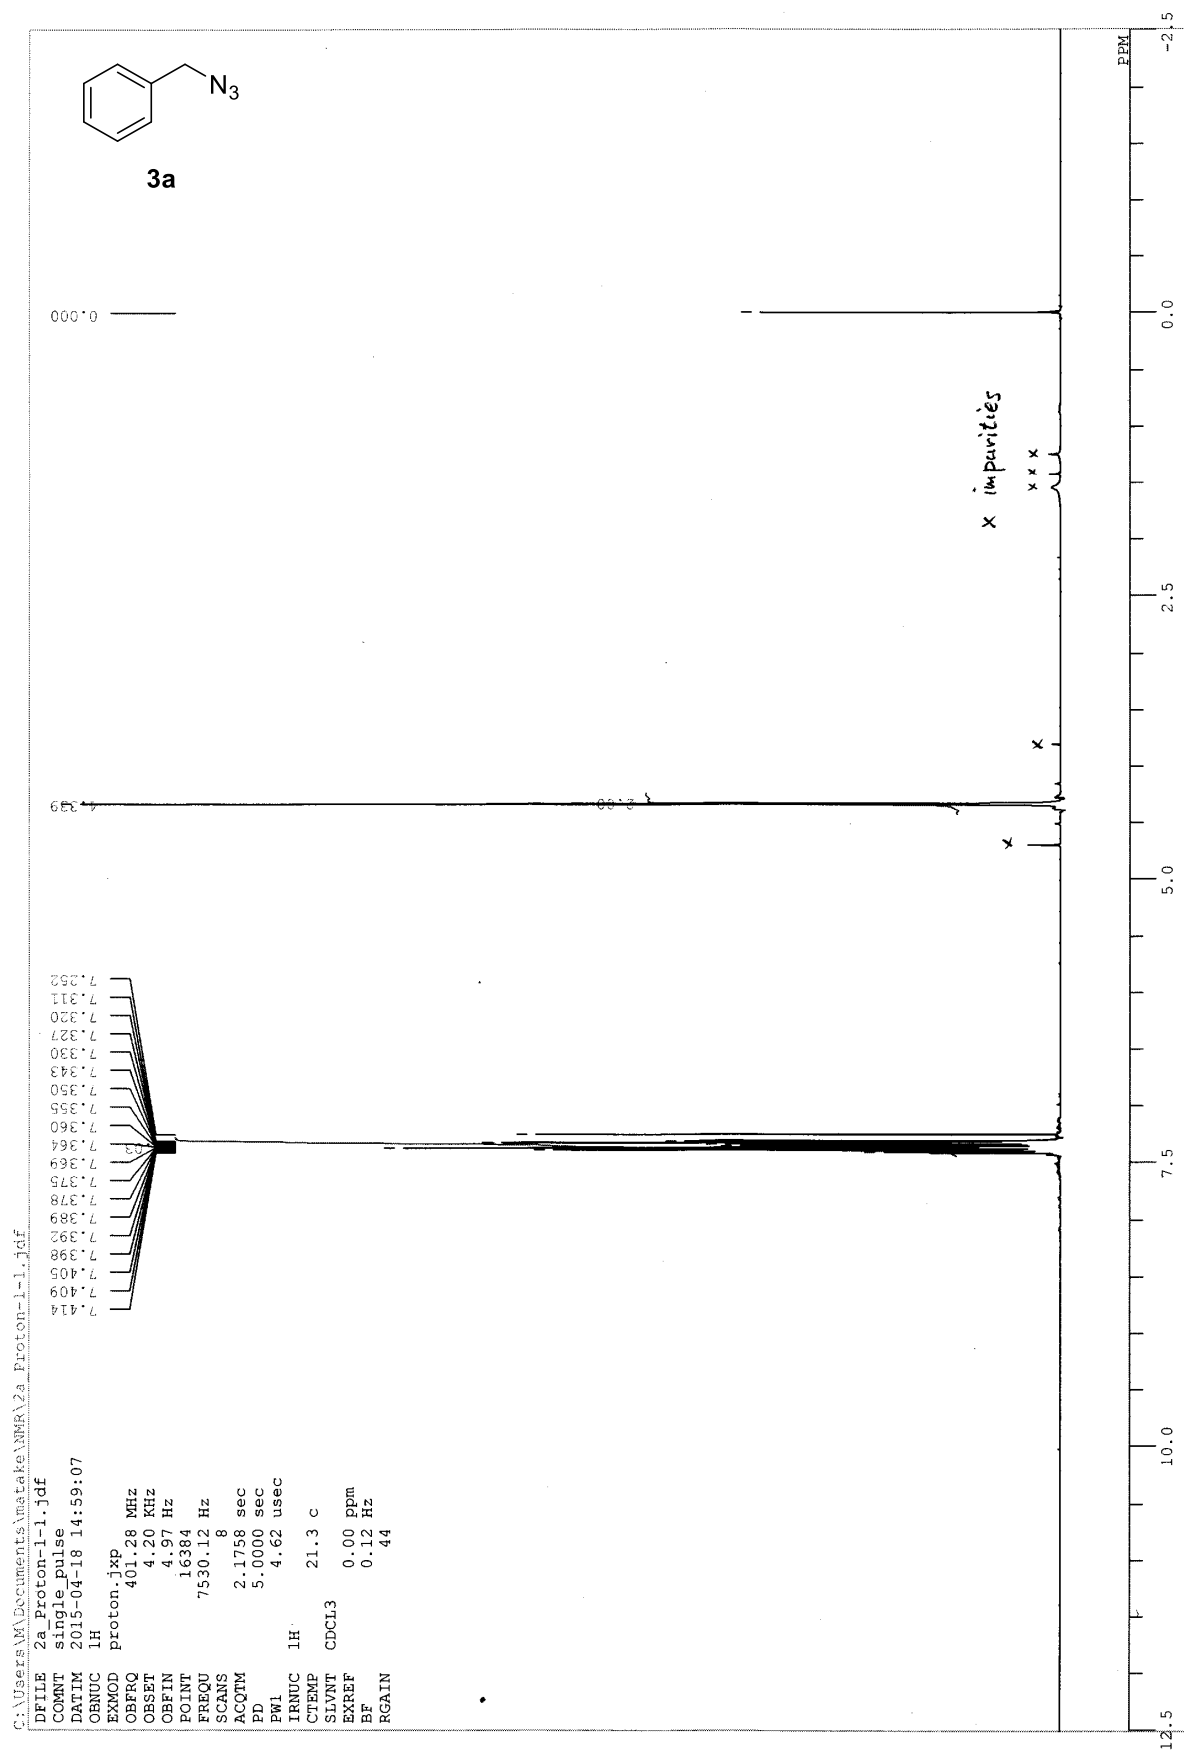

C:\Users\MA\Documents\matatake\NMR\MTX88-1 Carbon-1-L.jdf

DEFILE MTX88-1 Carbon-1-L.jdf  
CONNT single pulse decoupled gated NOE  
DATIM 2014-12-12 11:40:08  
CENUC 13C  
EXMOD carbon-1xp  
OBFRQ 100.91 MHz  
OBSET 2.56 KHz  
OBFIN 8.88 Hz  
POINT 32767  
FREQU 31565.66 Hz  
SCANS 256  
ACQTM 1.0381 sec  
PD 2.0000 sec  
PWL 2.92 usec  
IRNUC 1H  
CPRP 20.9 c  
SLVNT CDCL3  
EXREF 77.00 ppm  
BF 1.20 Hz  
RGAIN 50

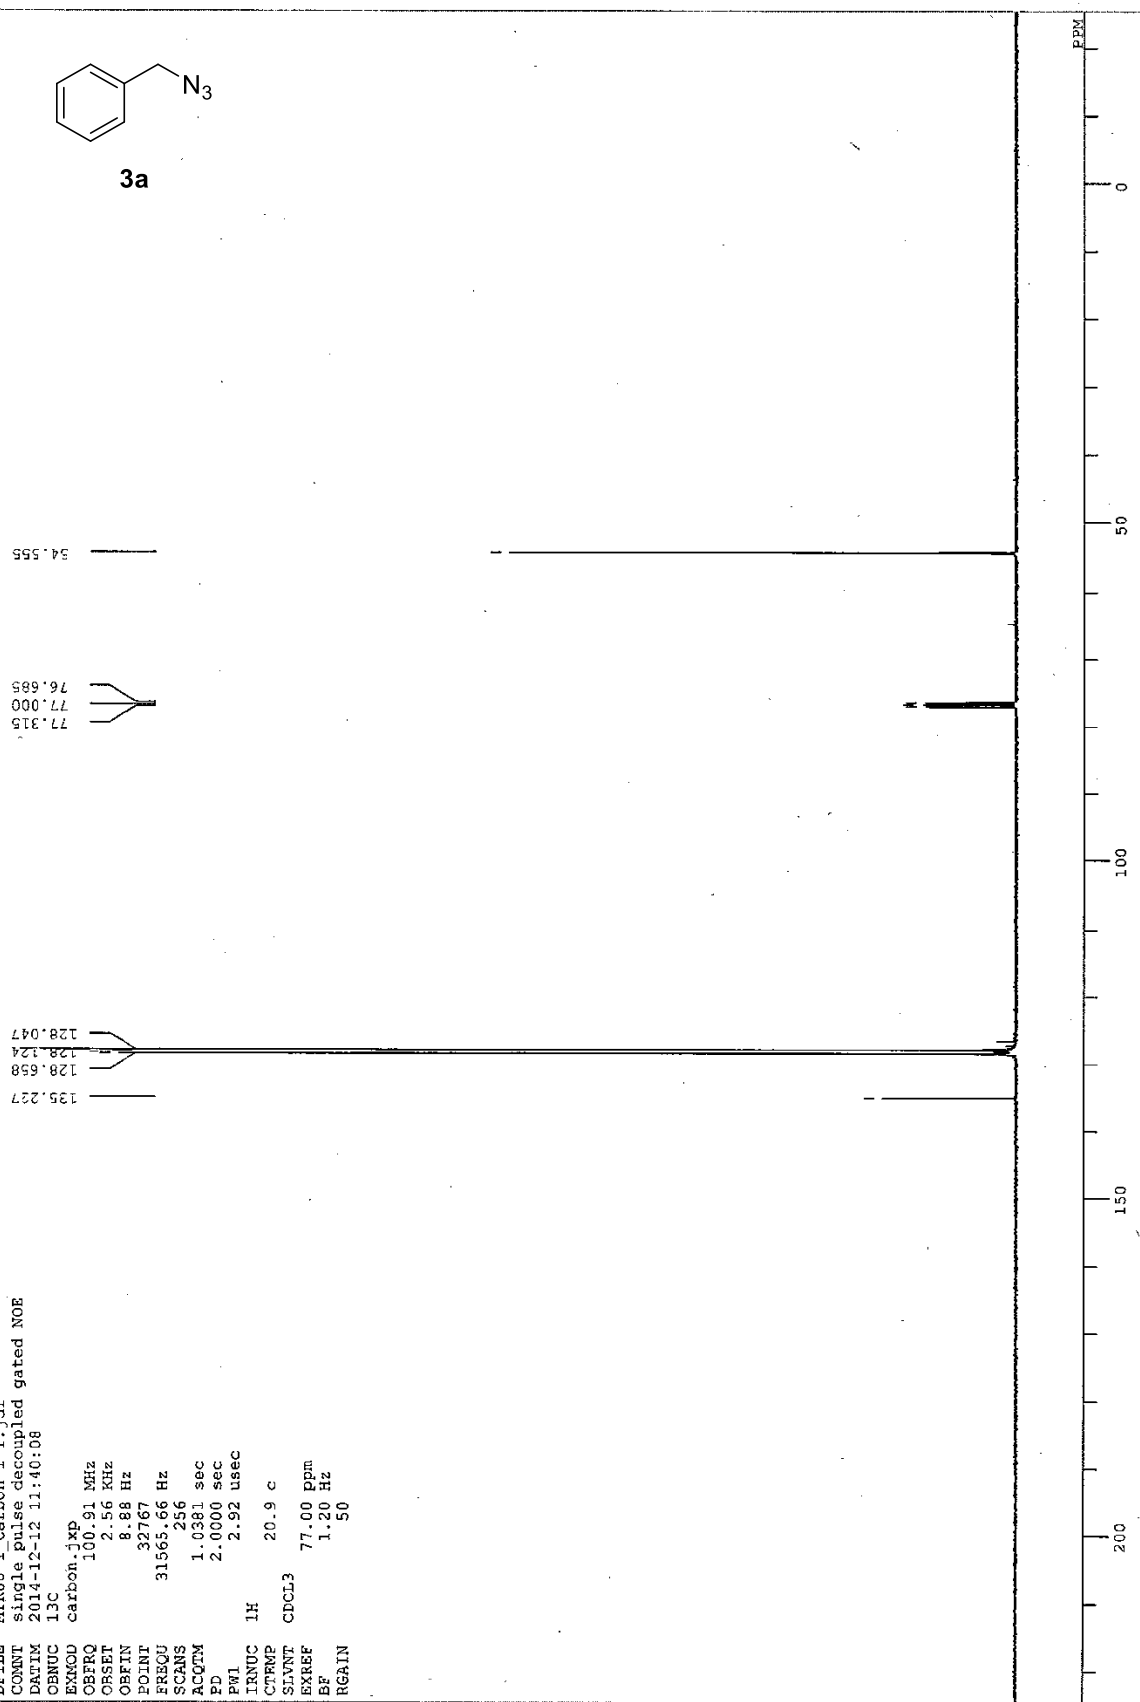

C:\Users\MDocuments\matak\NMR\NMR34-1 Proton-1-1.fdf

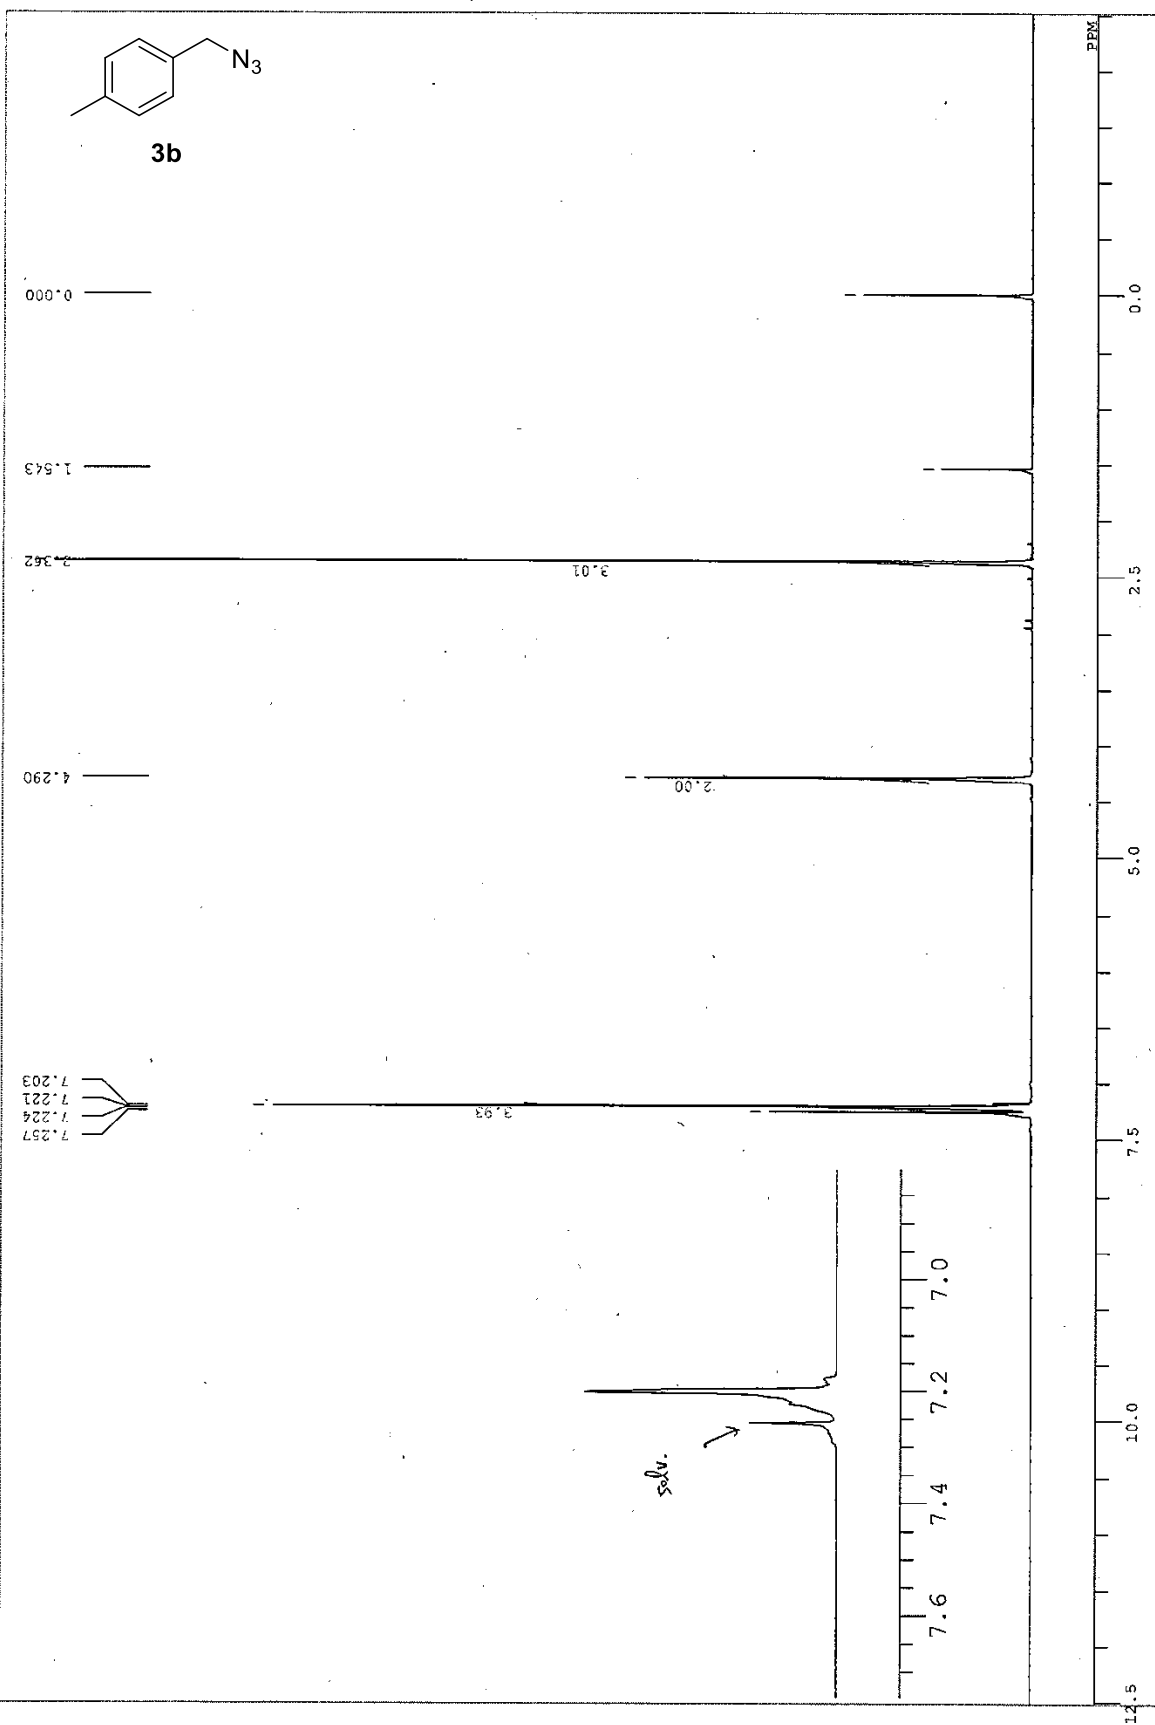

C:\Users\A\Documents\Natake\NMR\NMR94-1\_Carbon-1-1-1.jdf

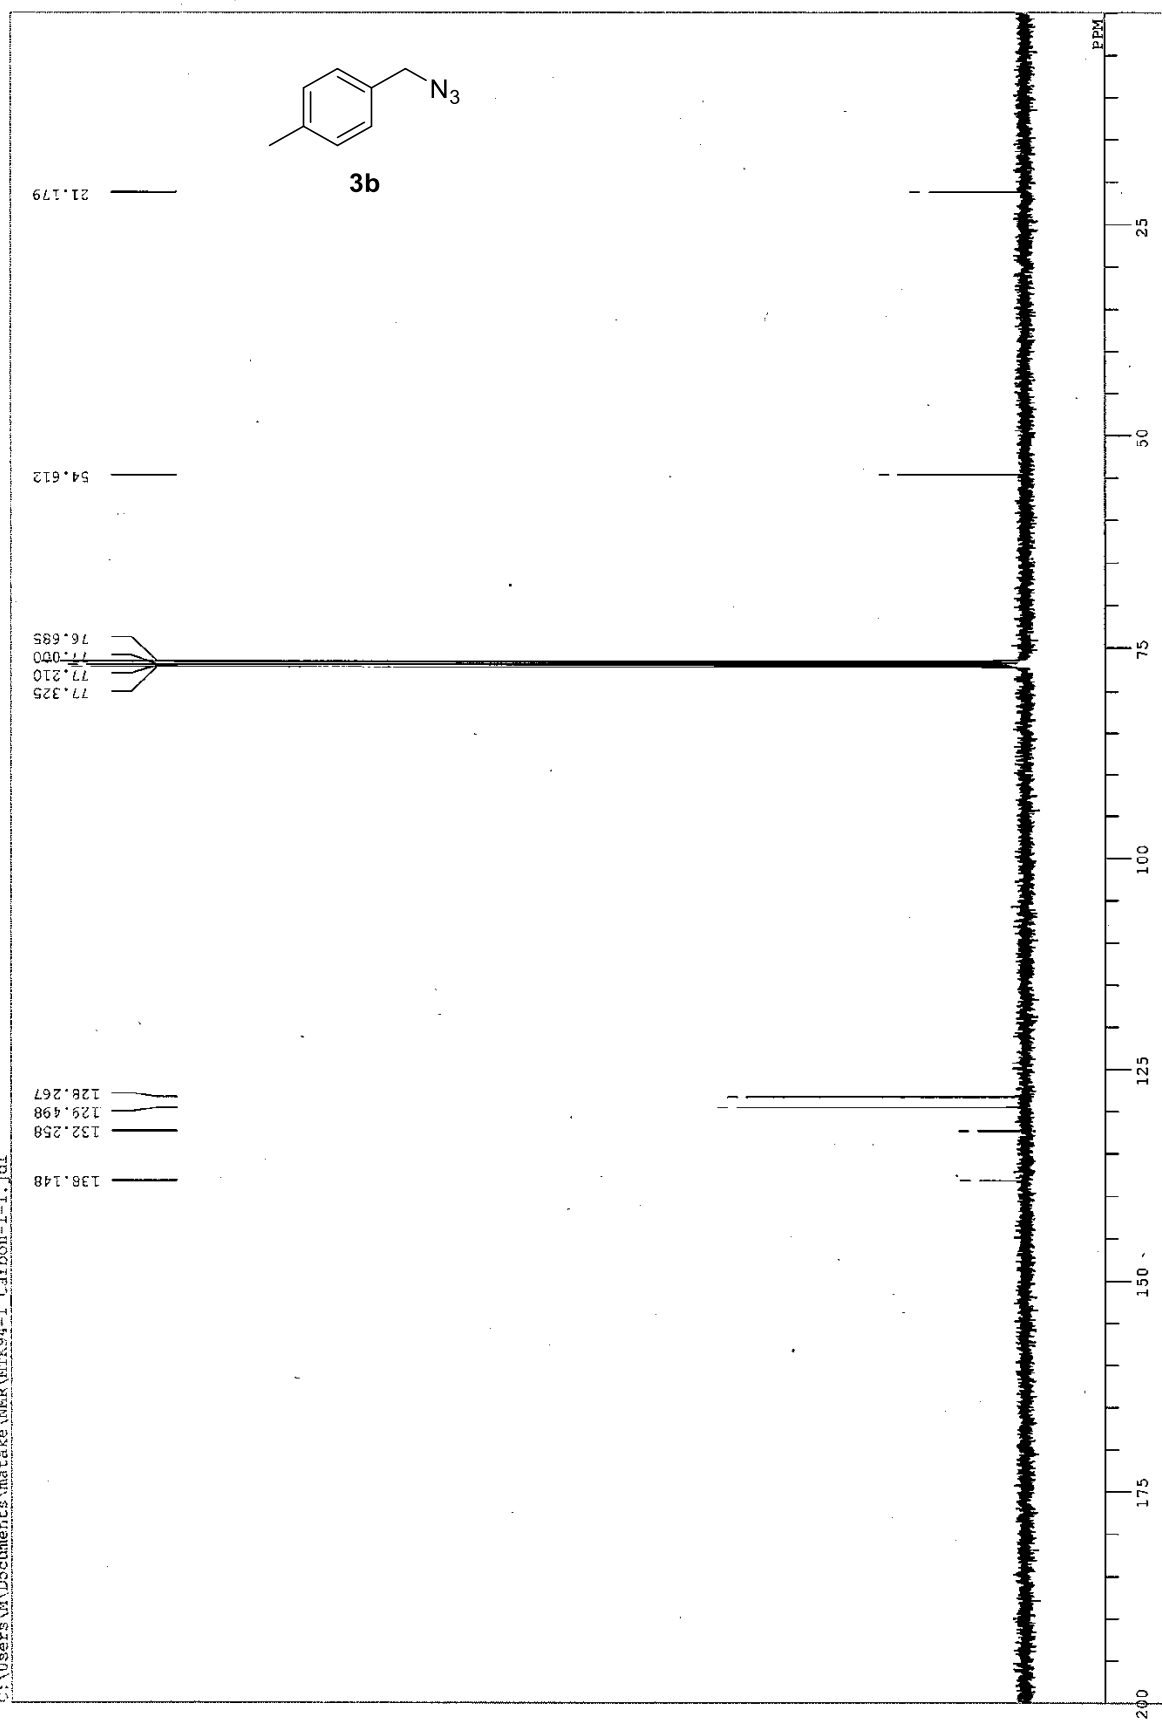



C:\Users\H\Documents\matak\NMR\Wt25-1 Proton-1-1.tif

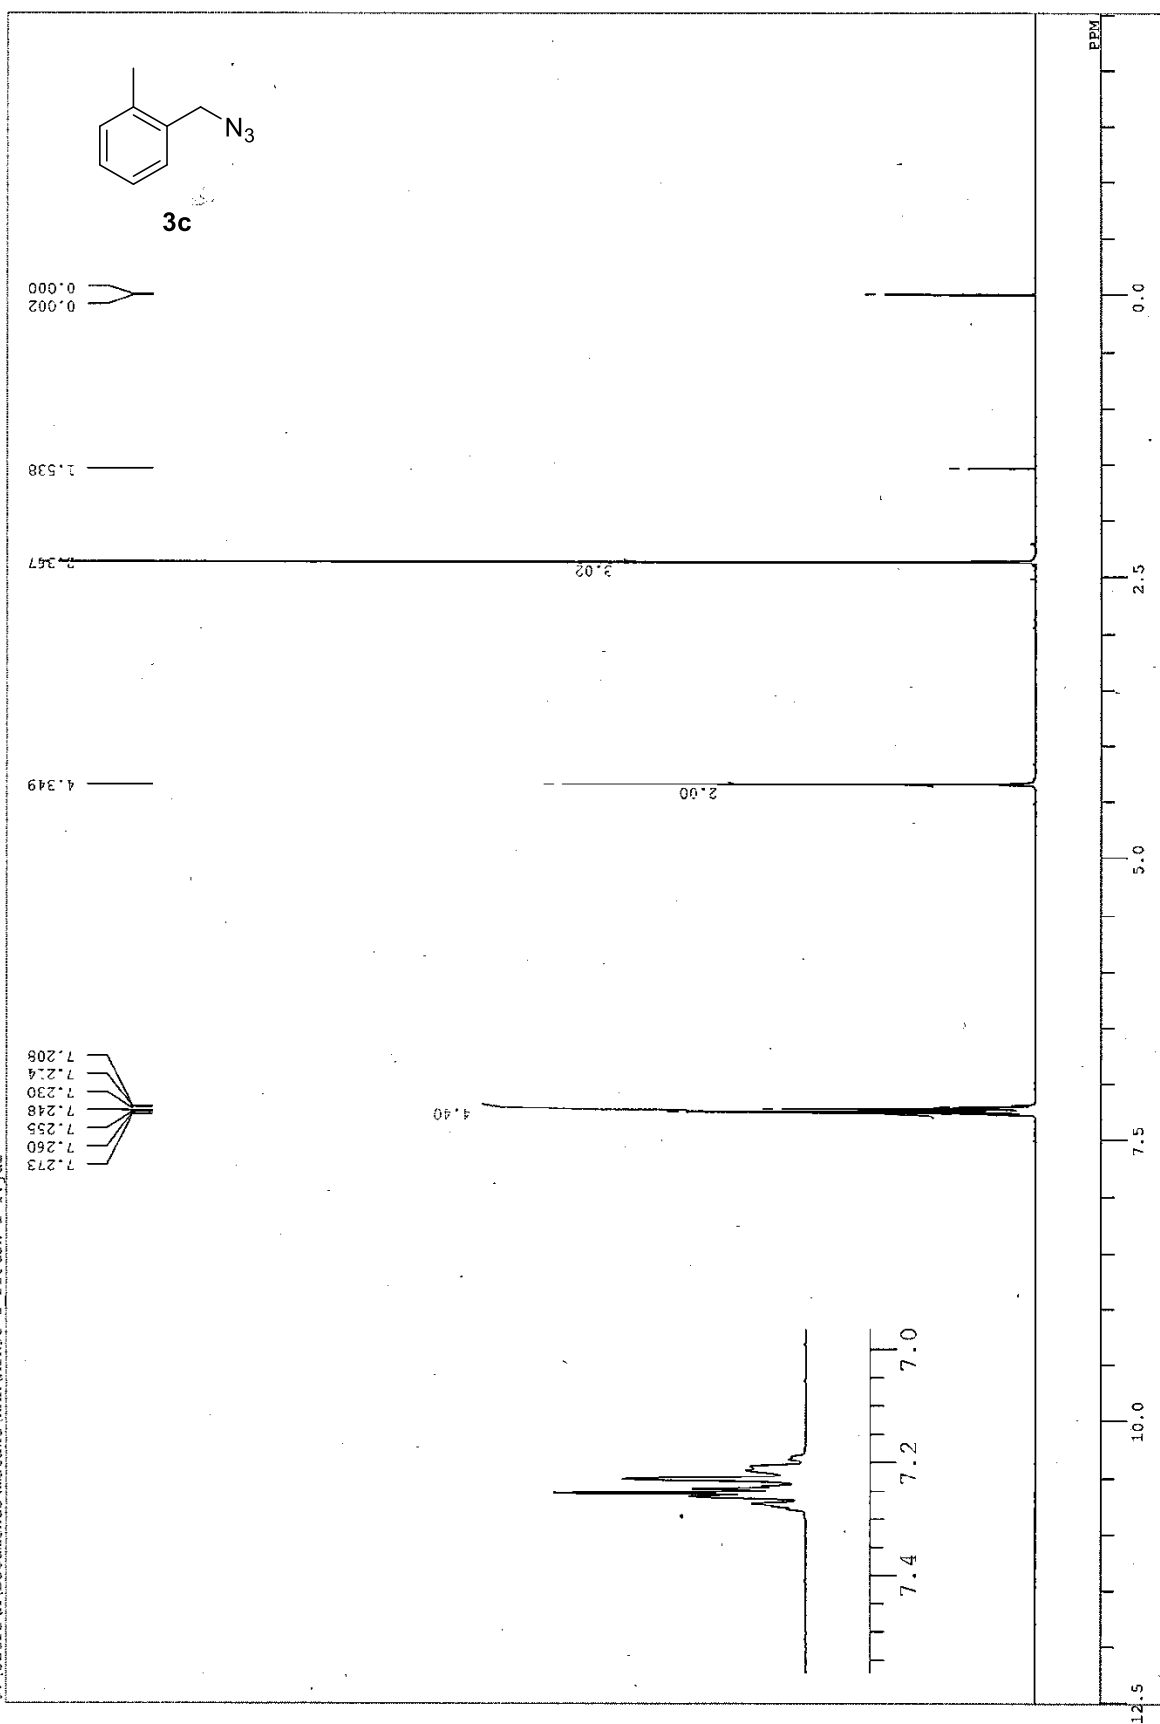

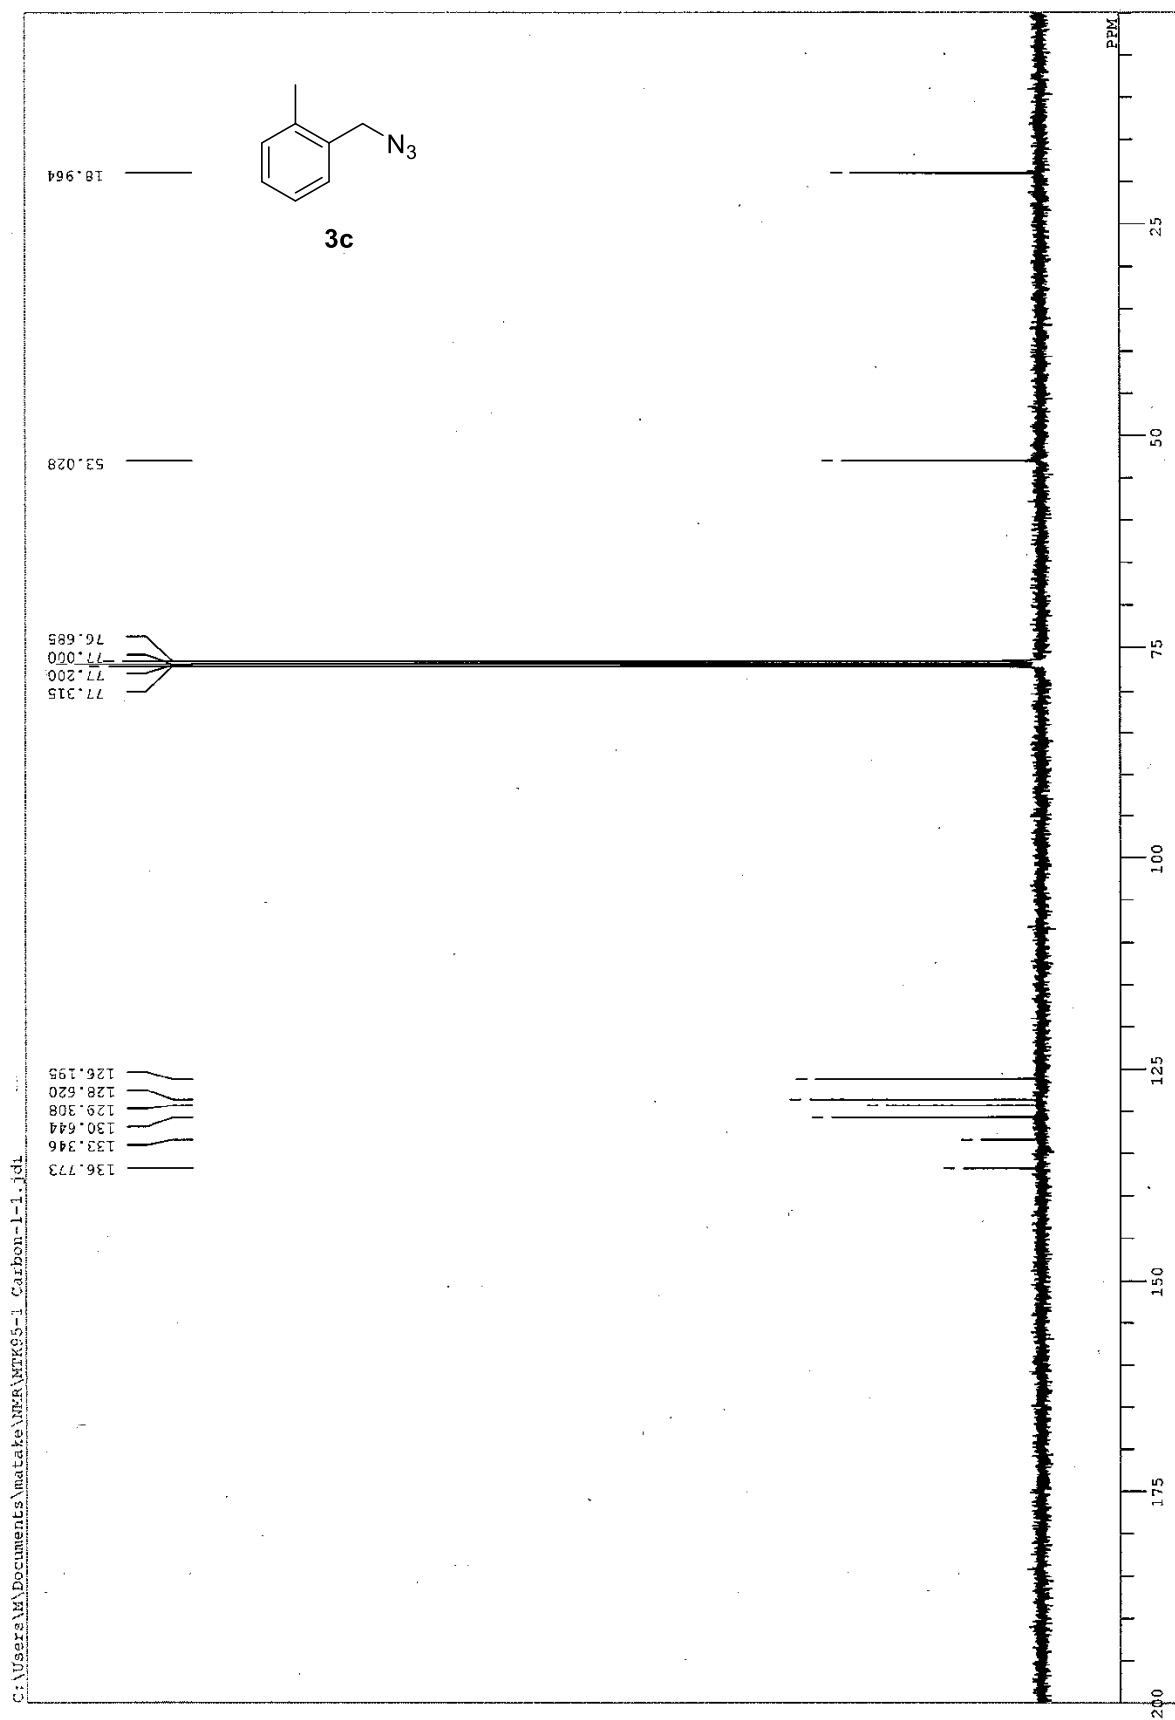

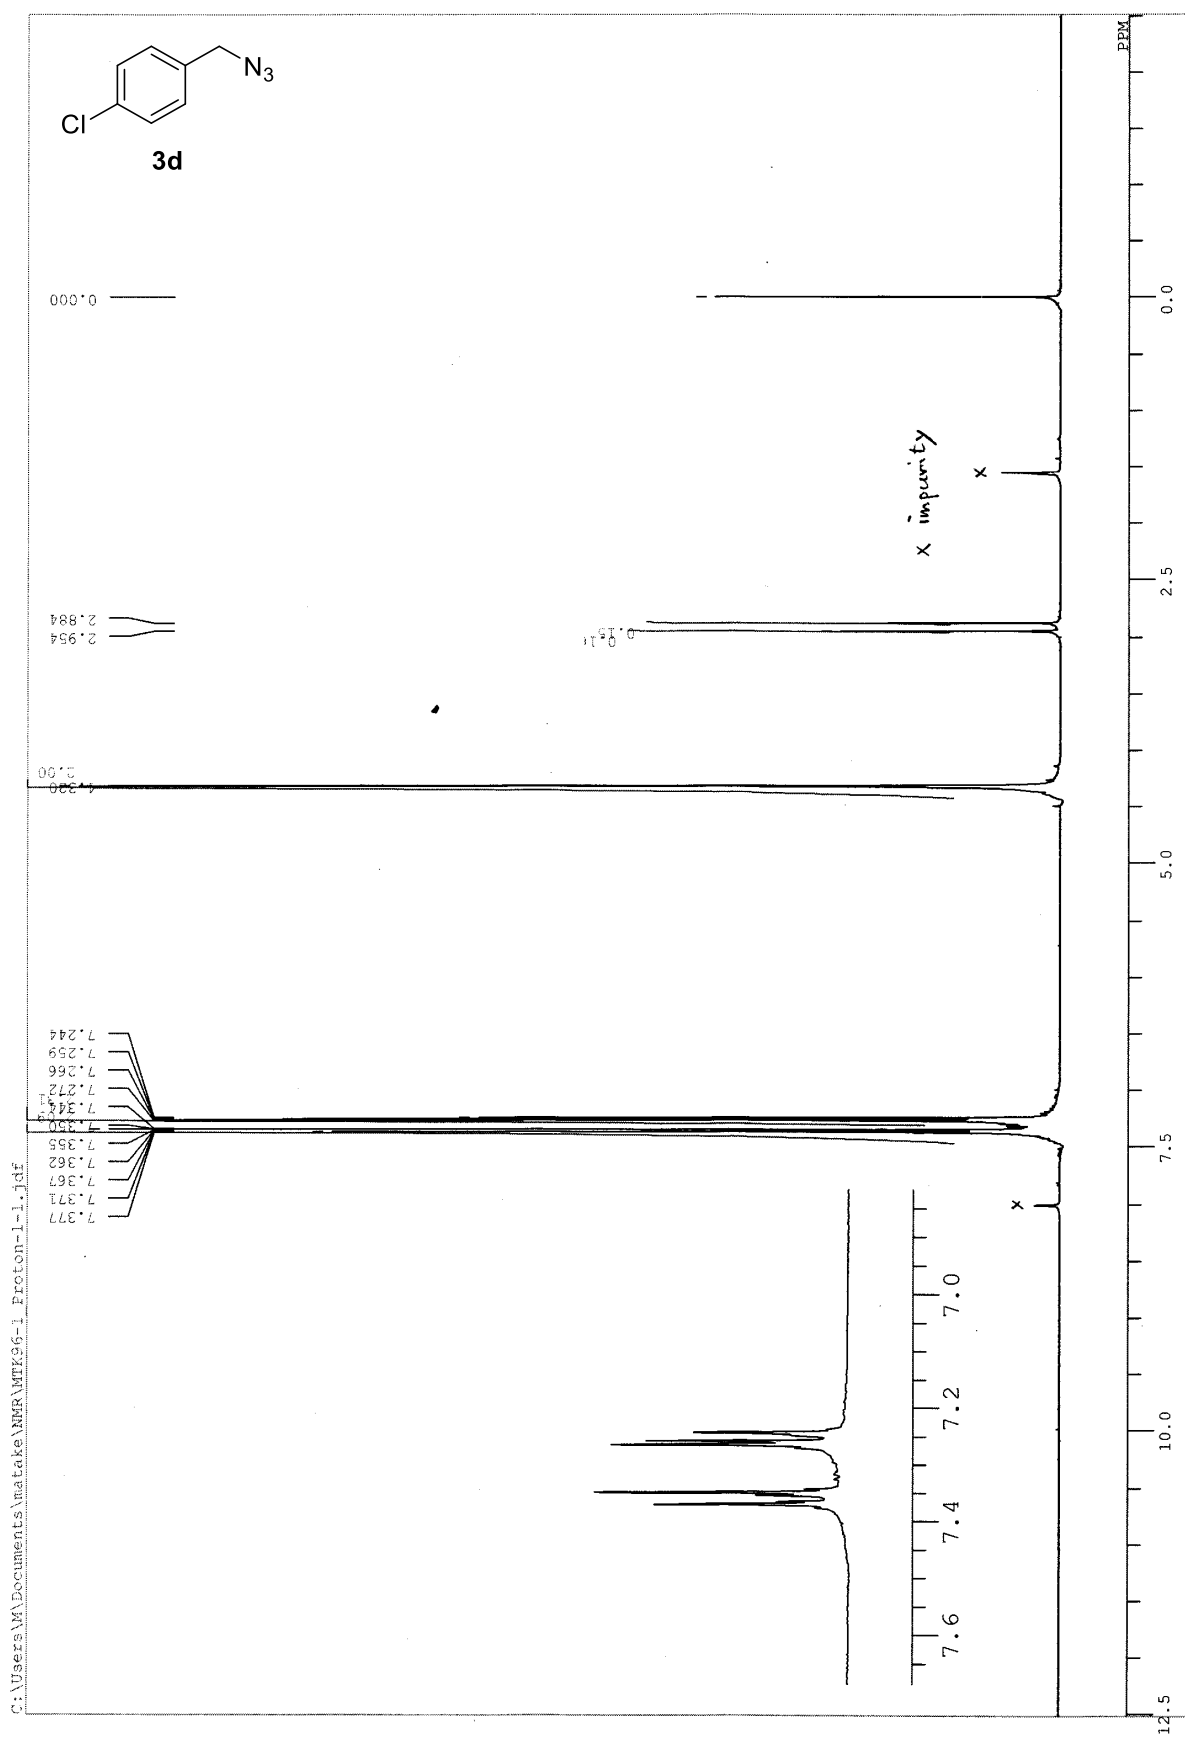

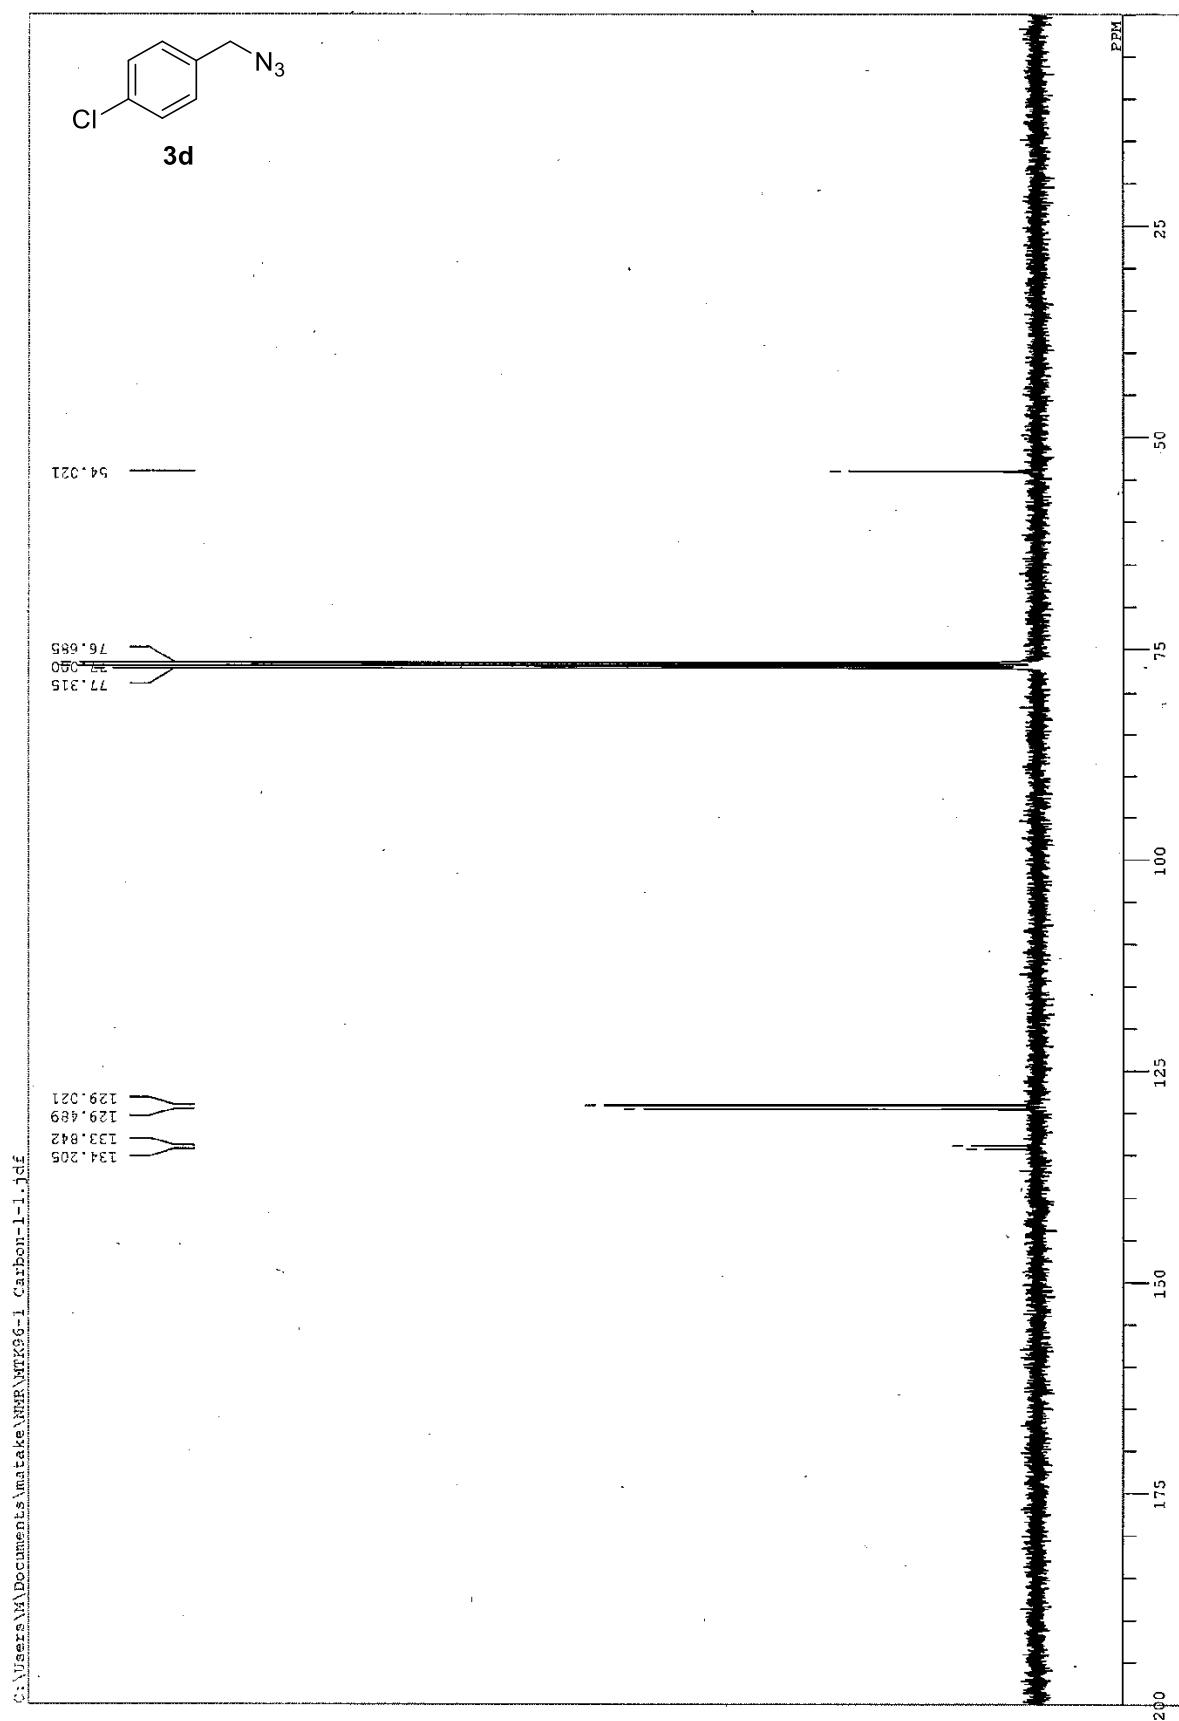

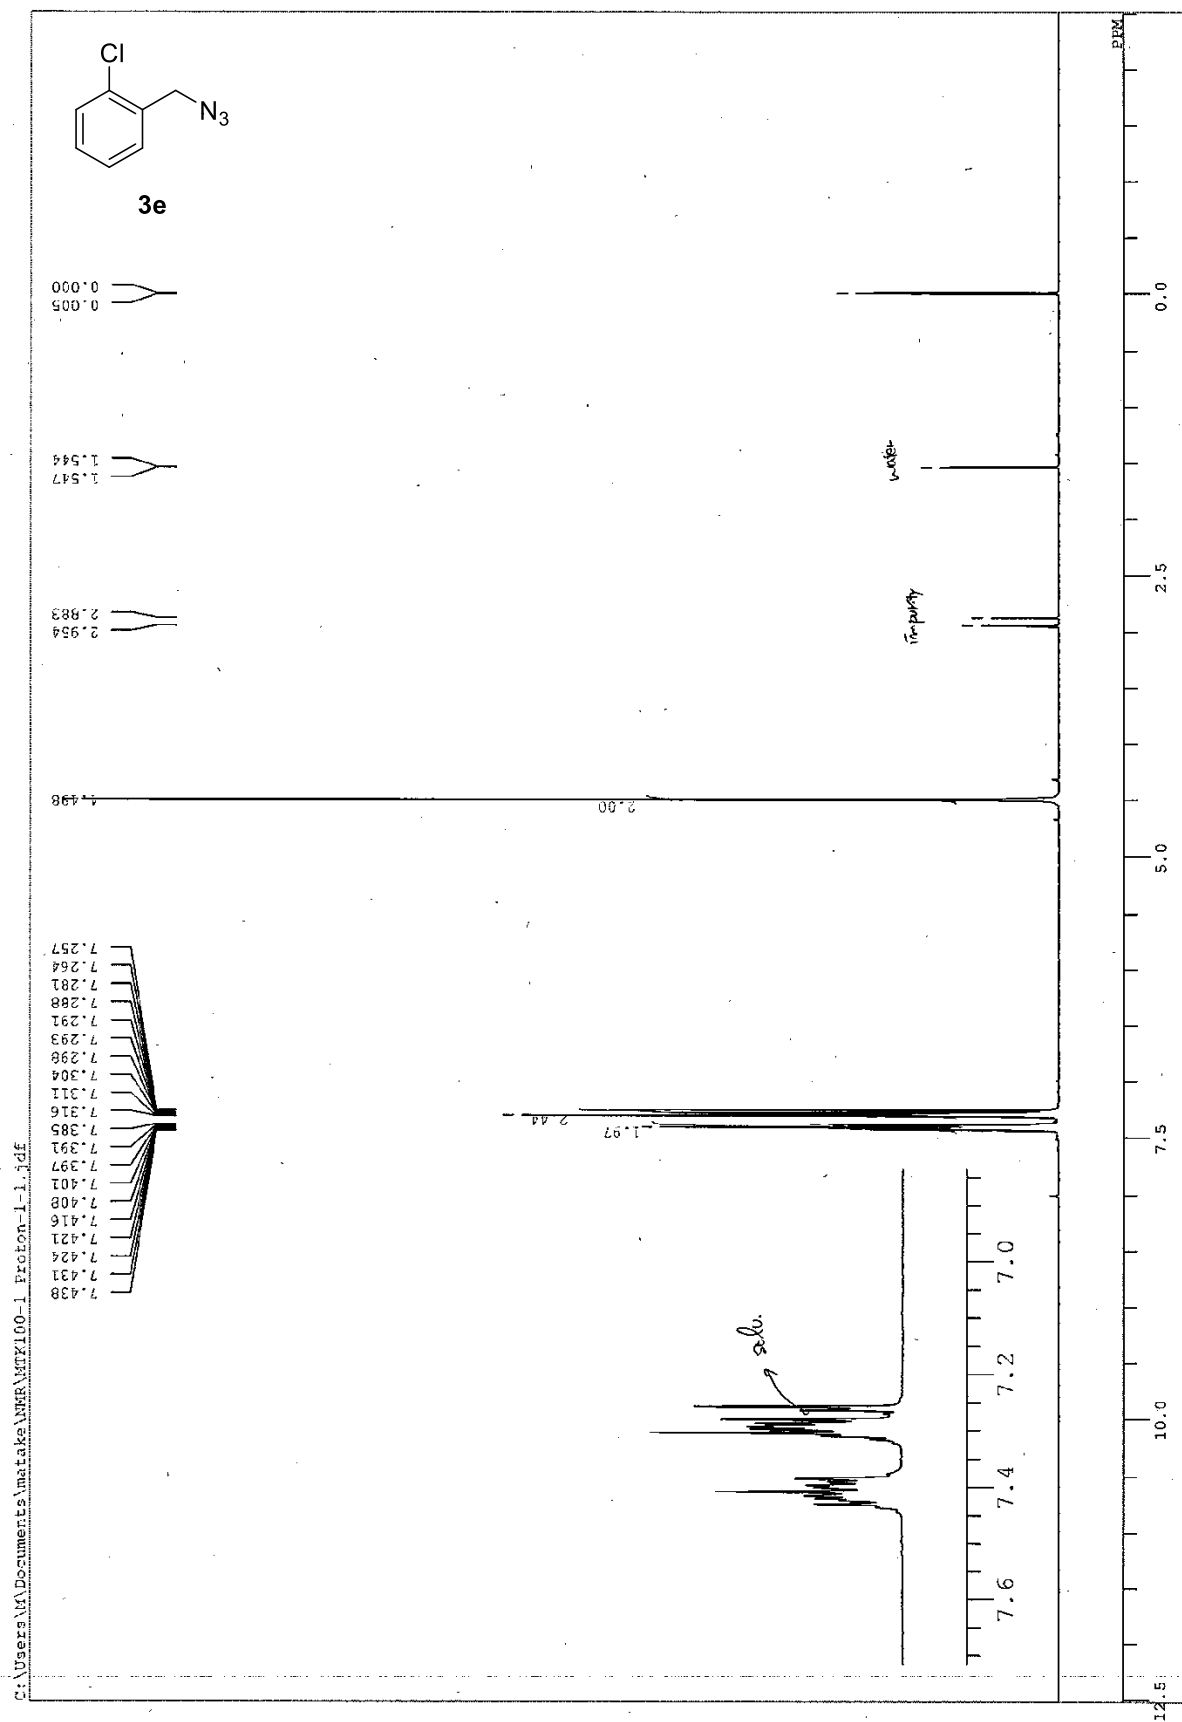

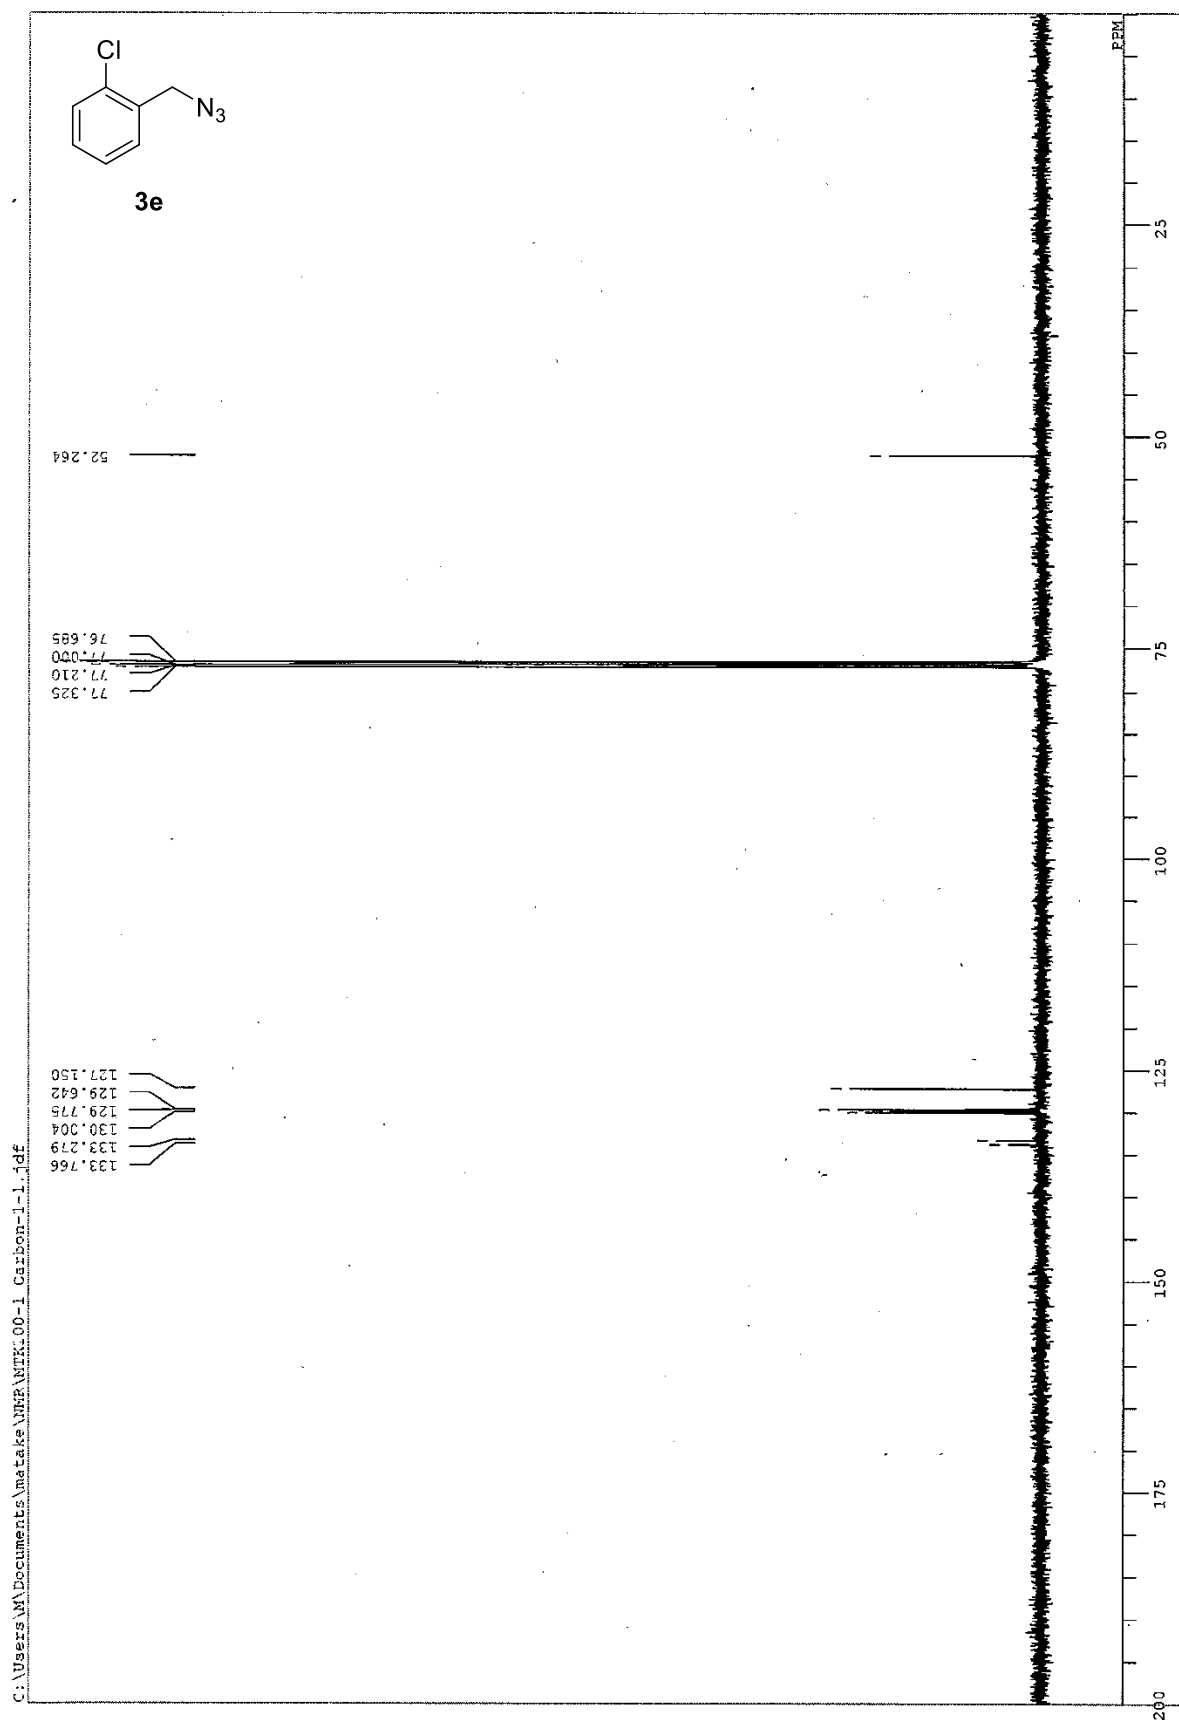

C:\Users\N\Documents\NMR\NMR37-1 Proton-1-1.jdf

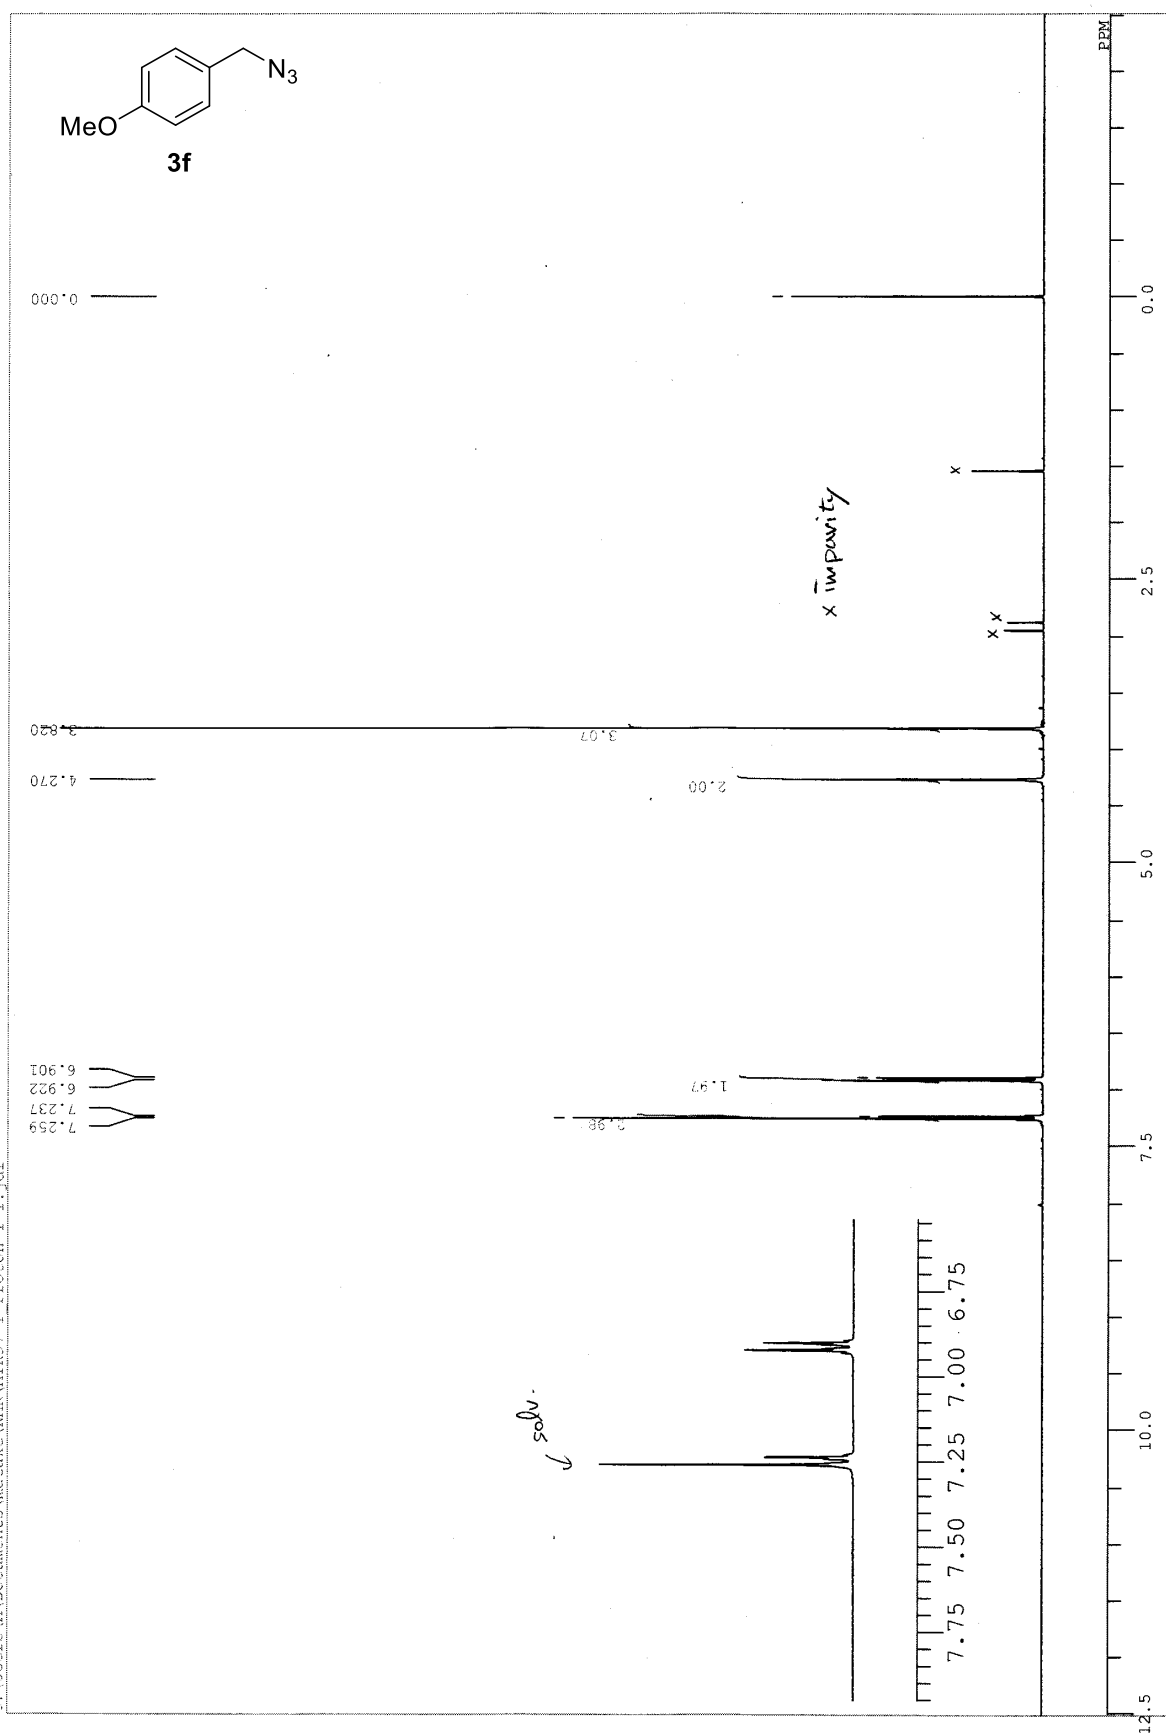

C:\Users\M\Documents\mateke\NMR\Wt97-2 Carbon-1-1-1.tif

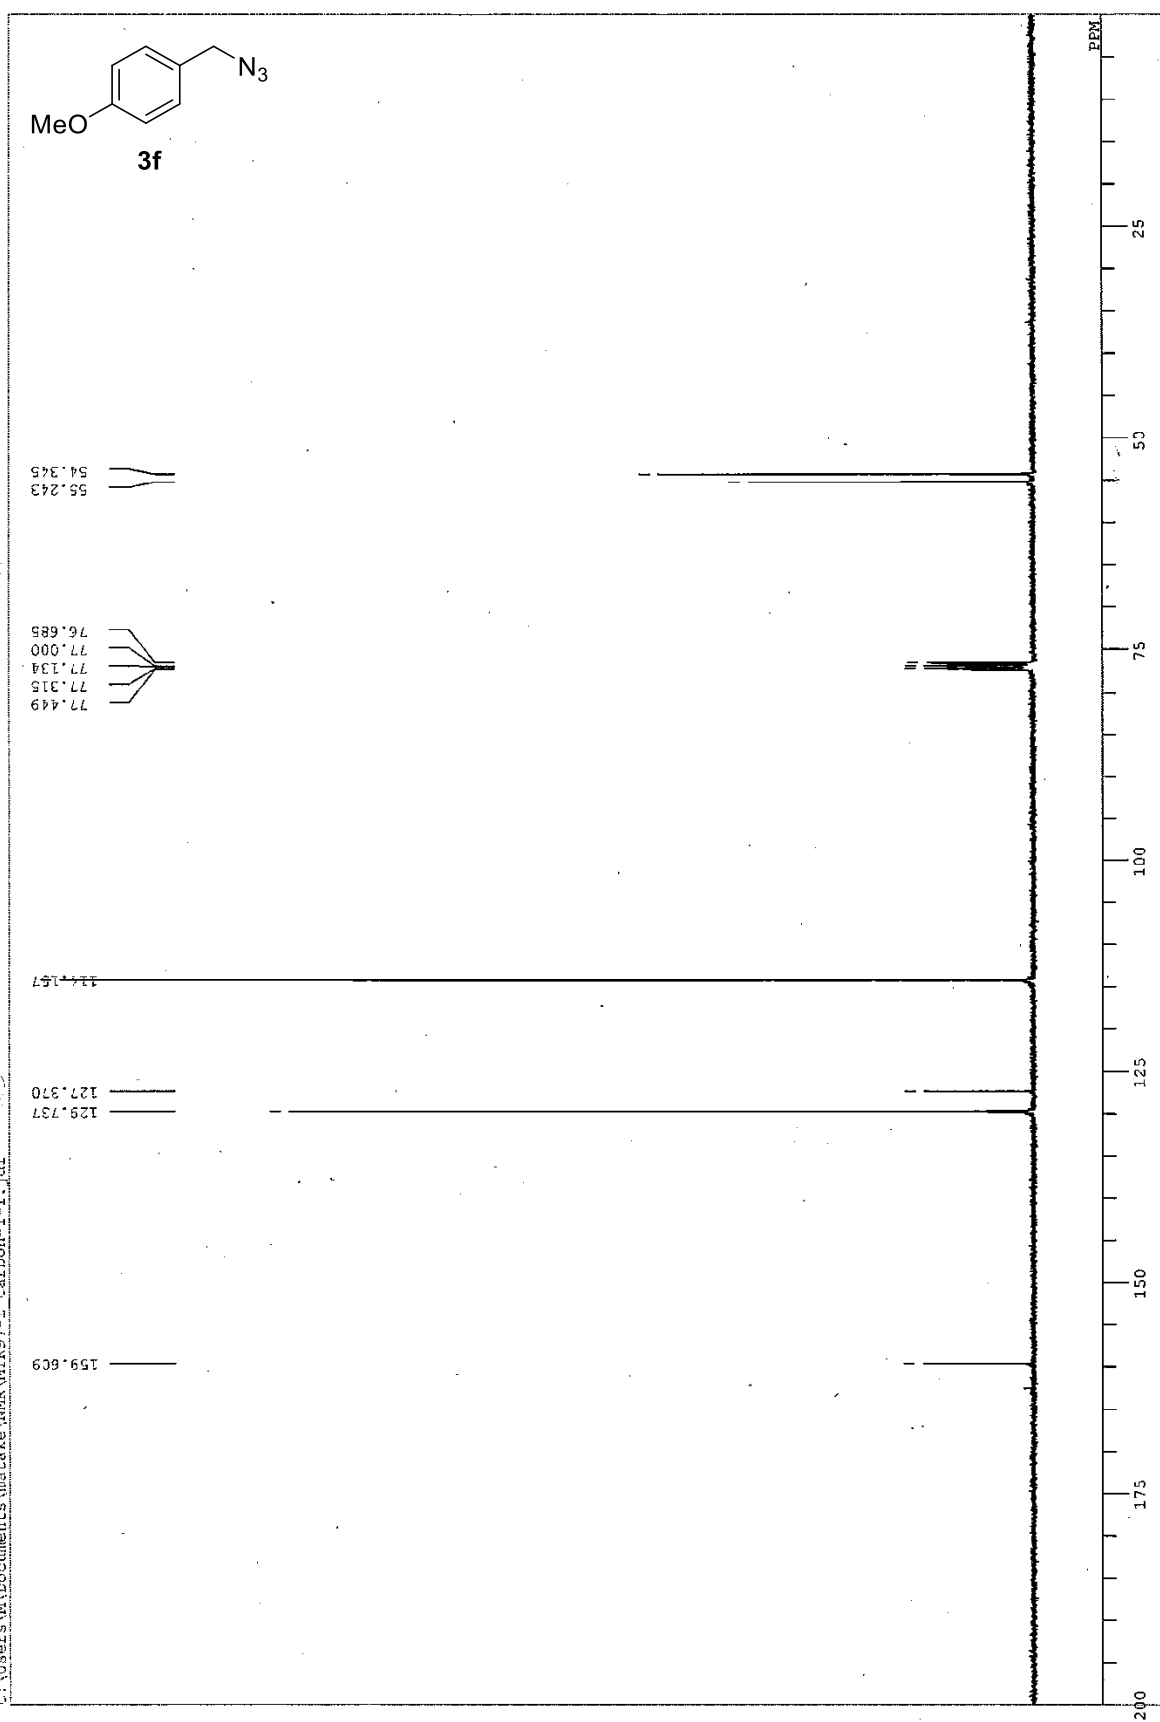



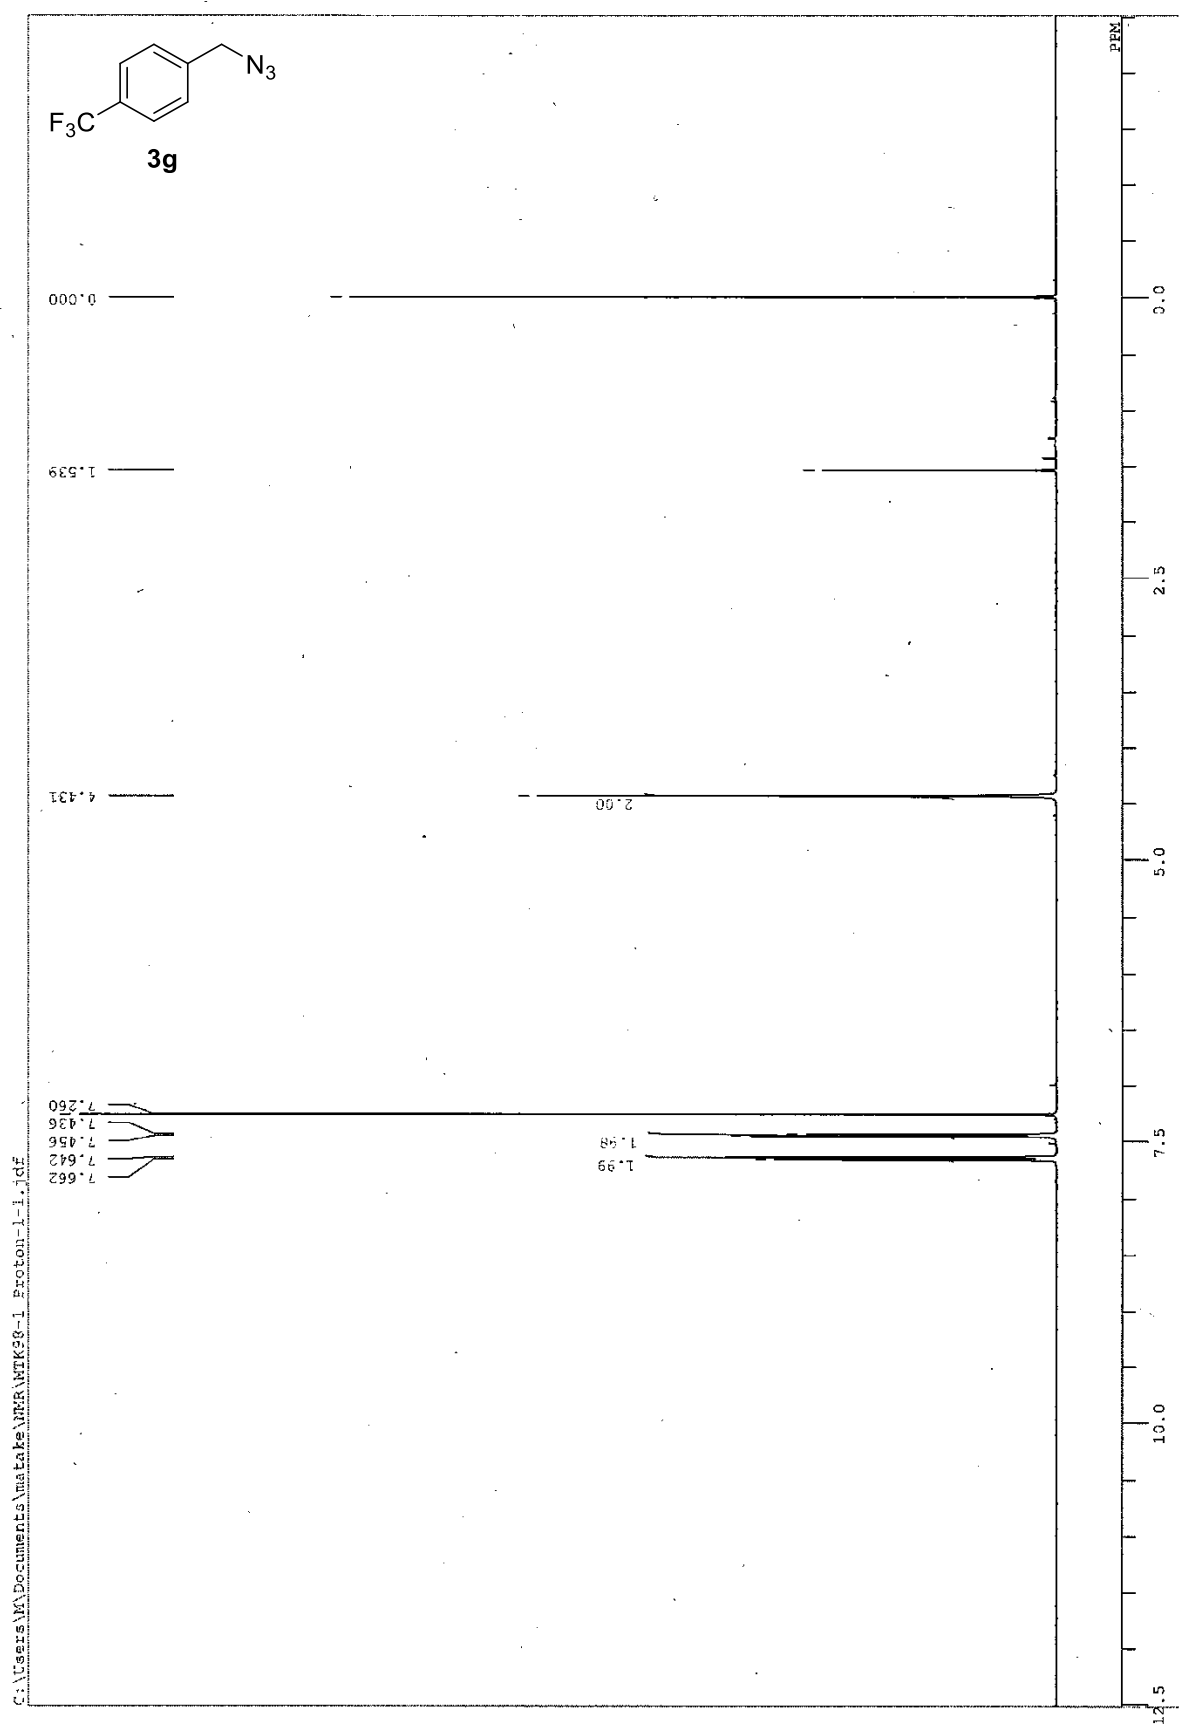

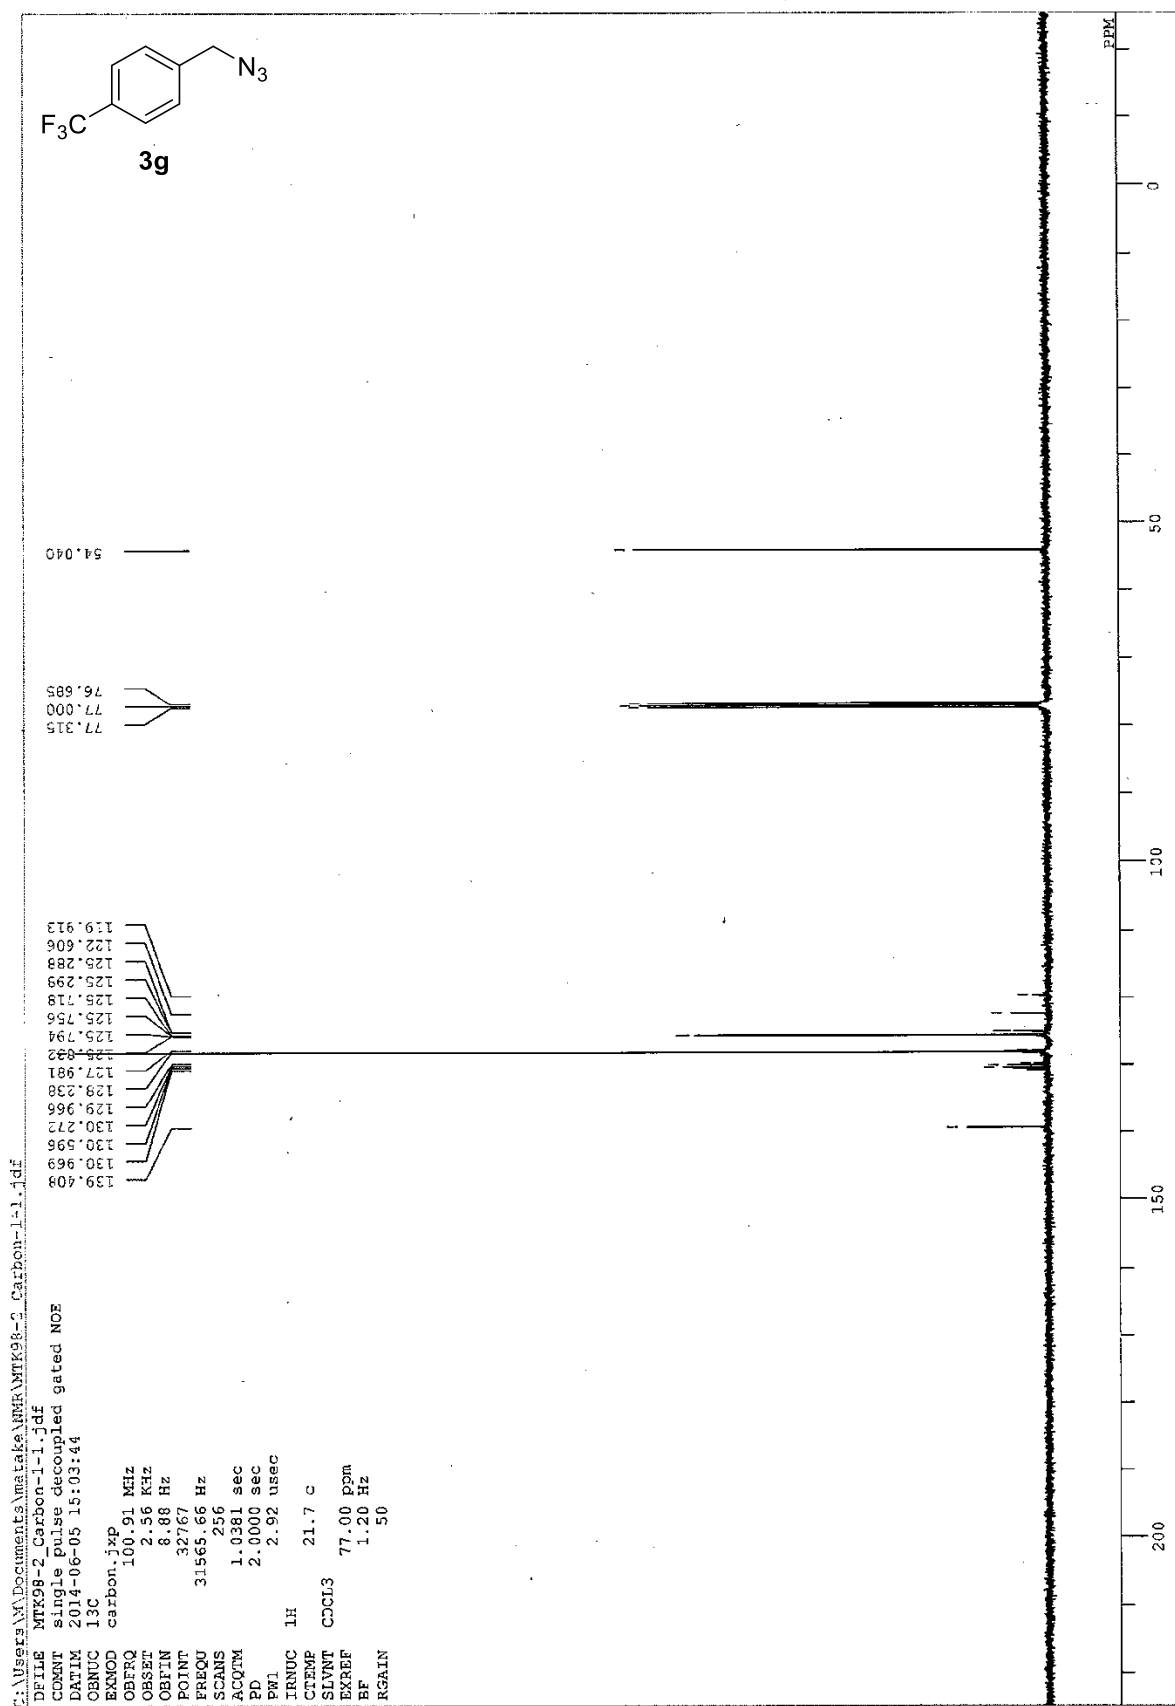

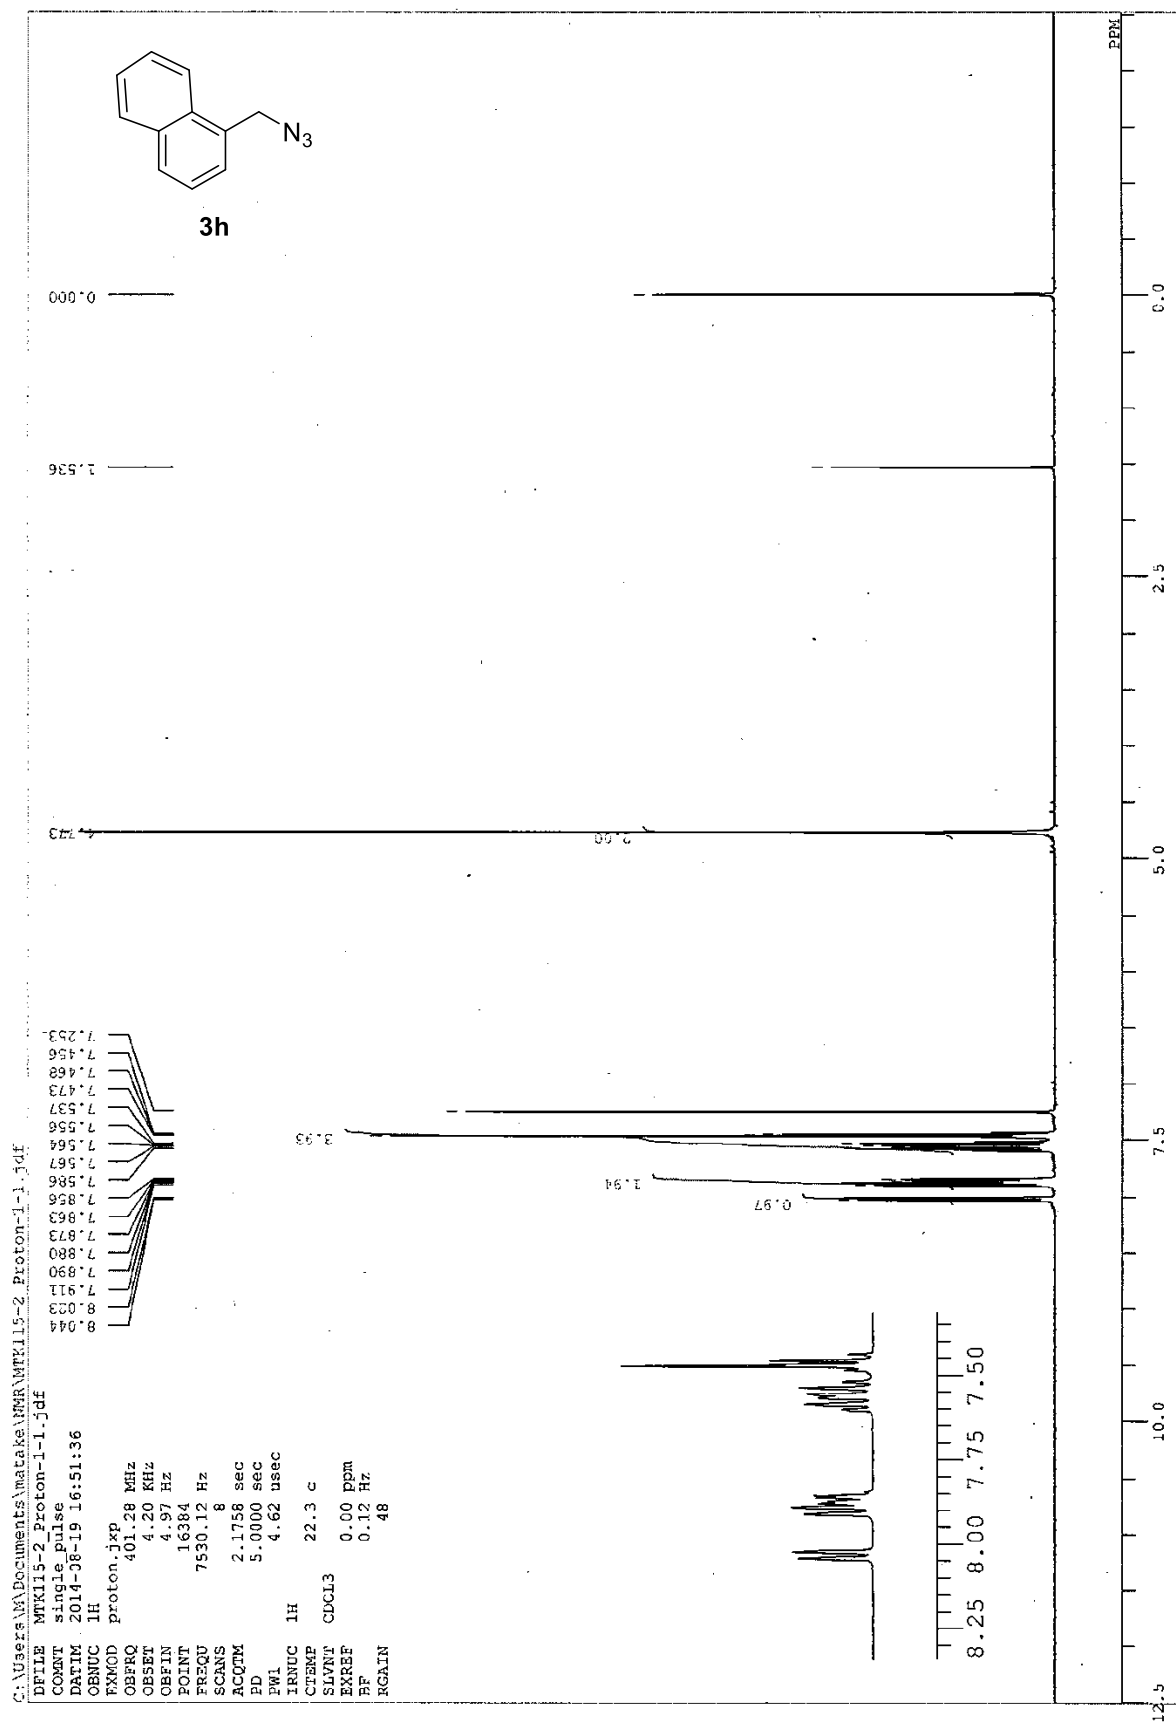



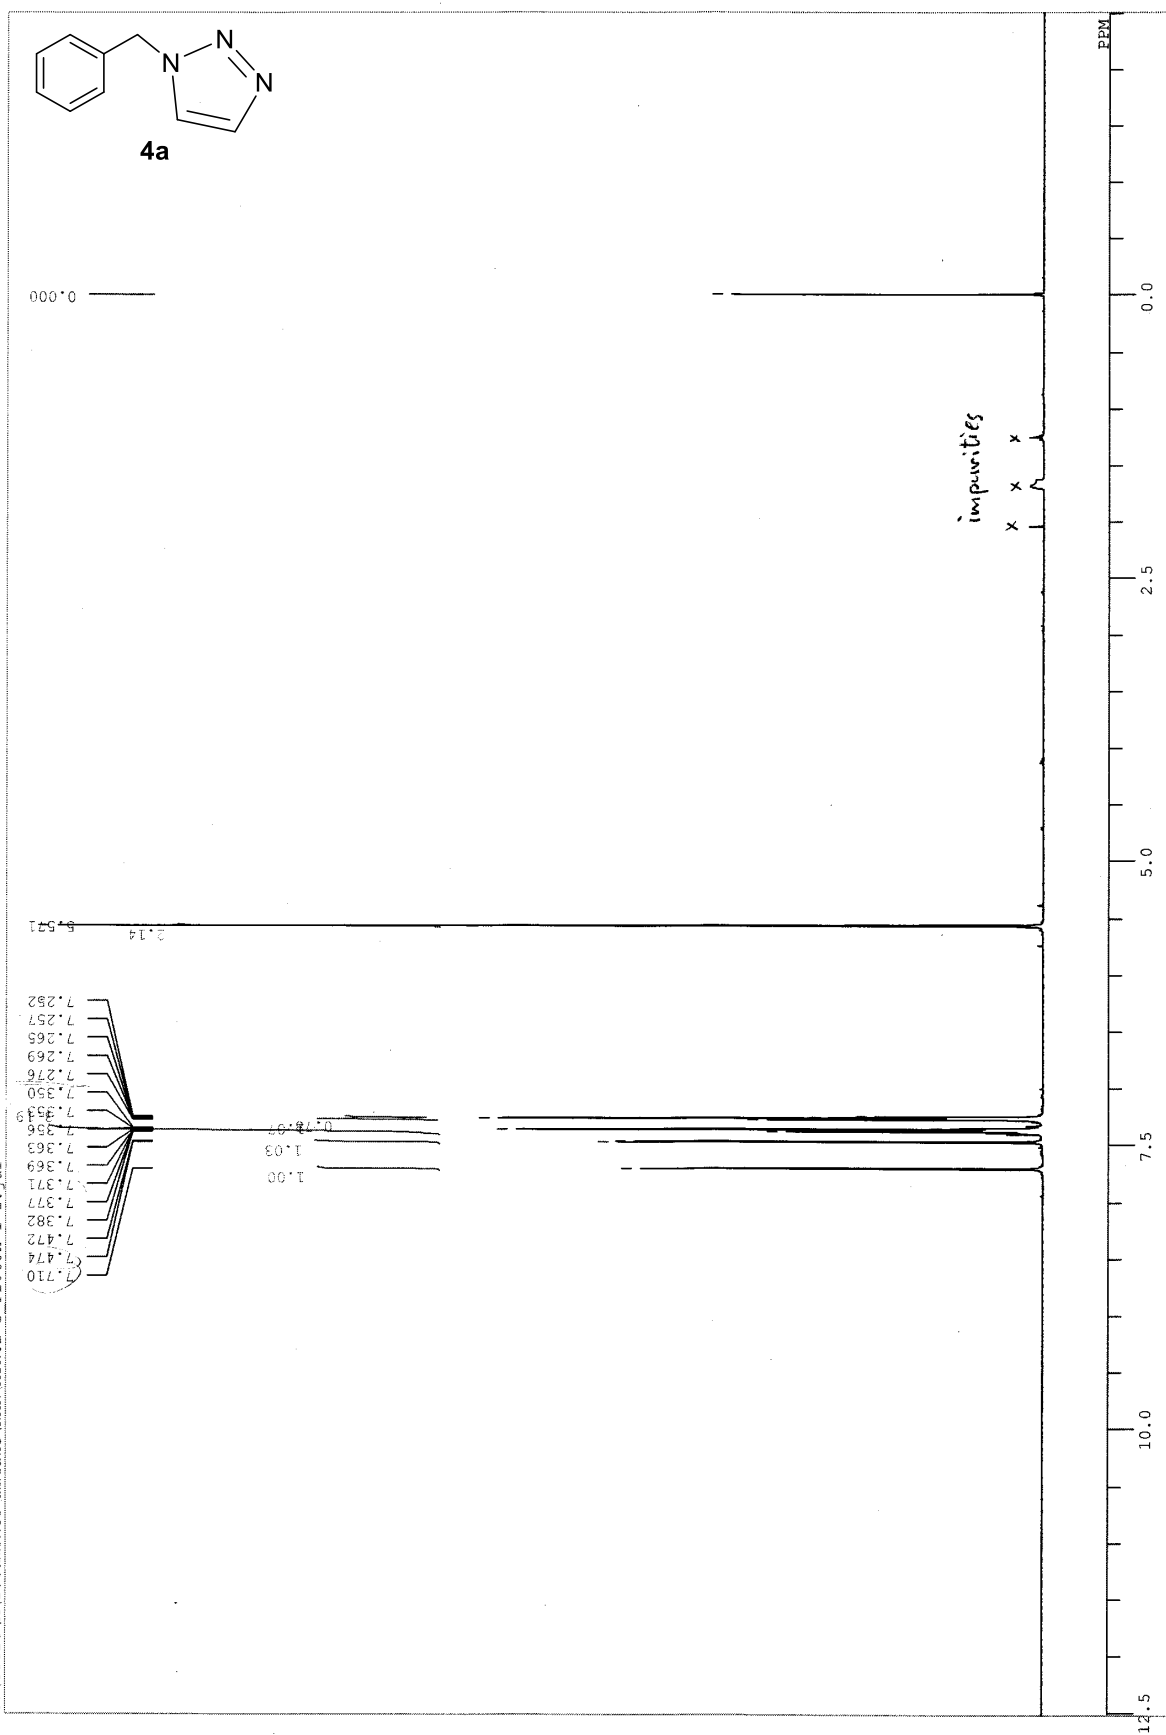

C:\Users\A\Documents\matak\NMR\NMR82-2\_Carbon-1-1.jdf

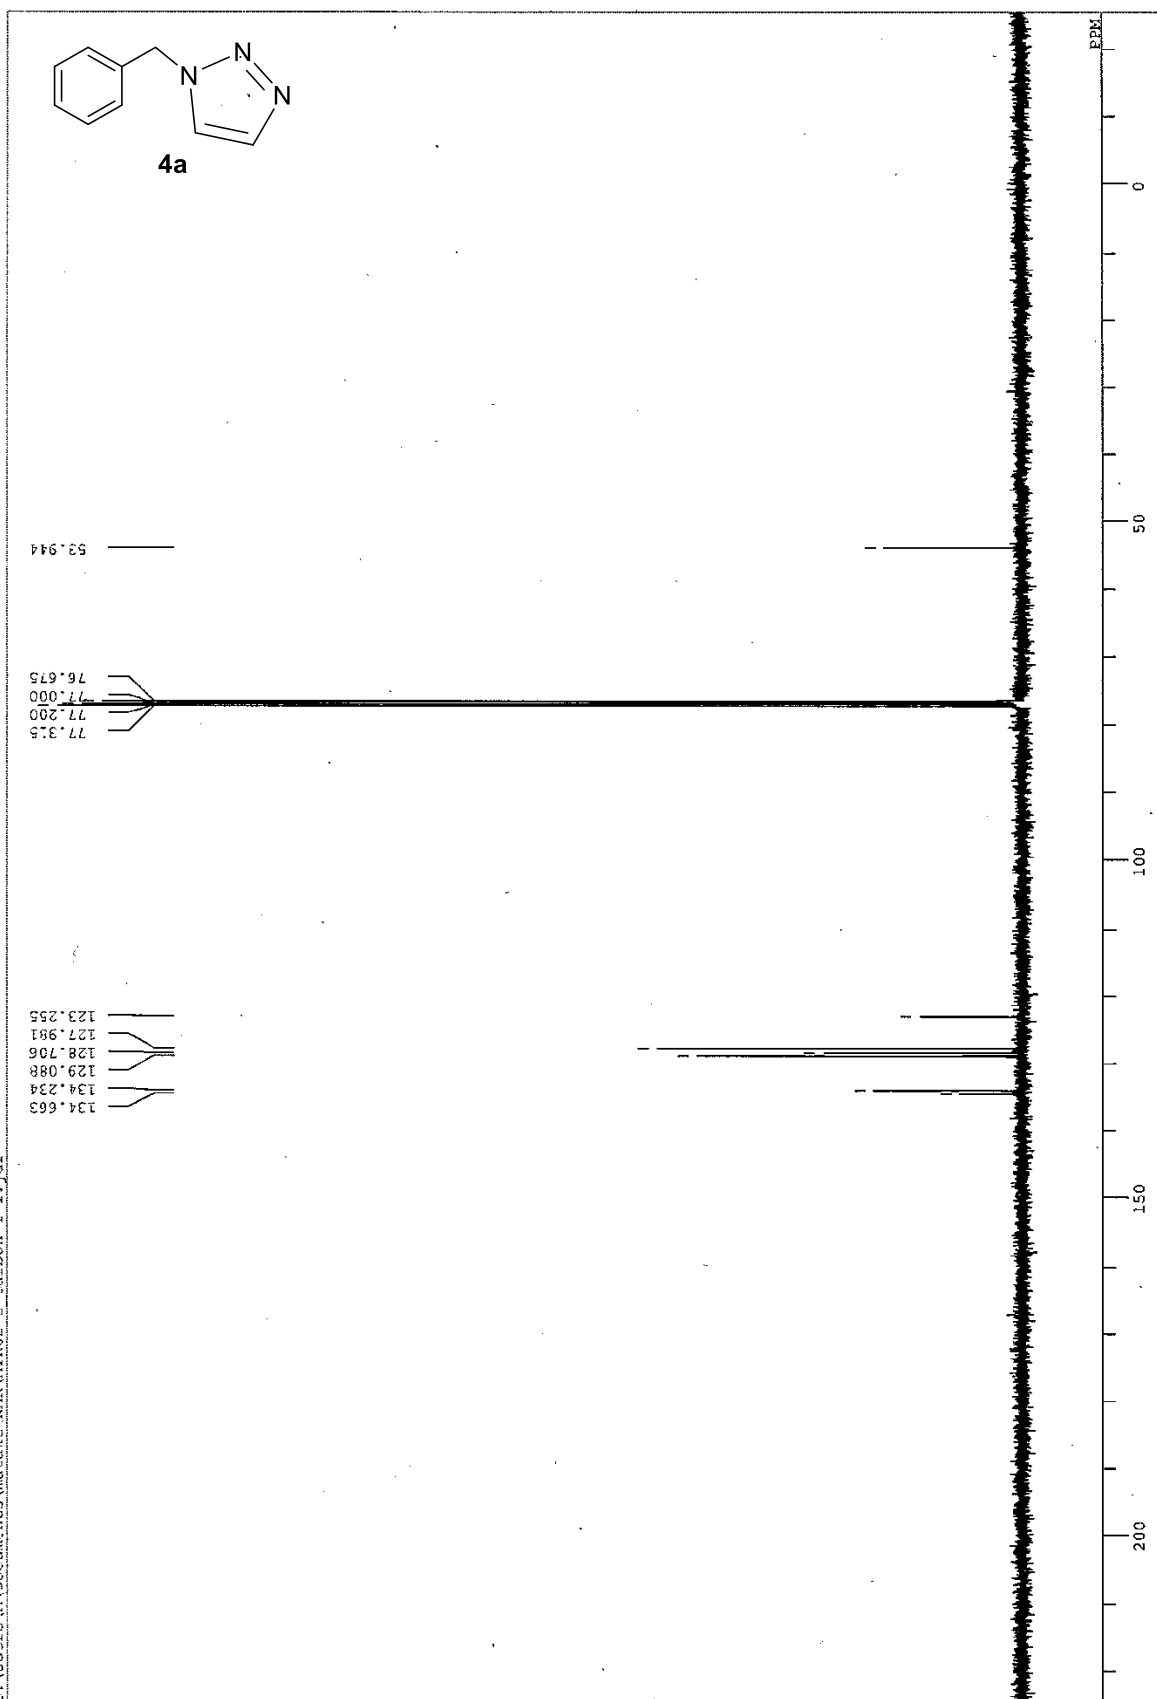

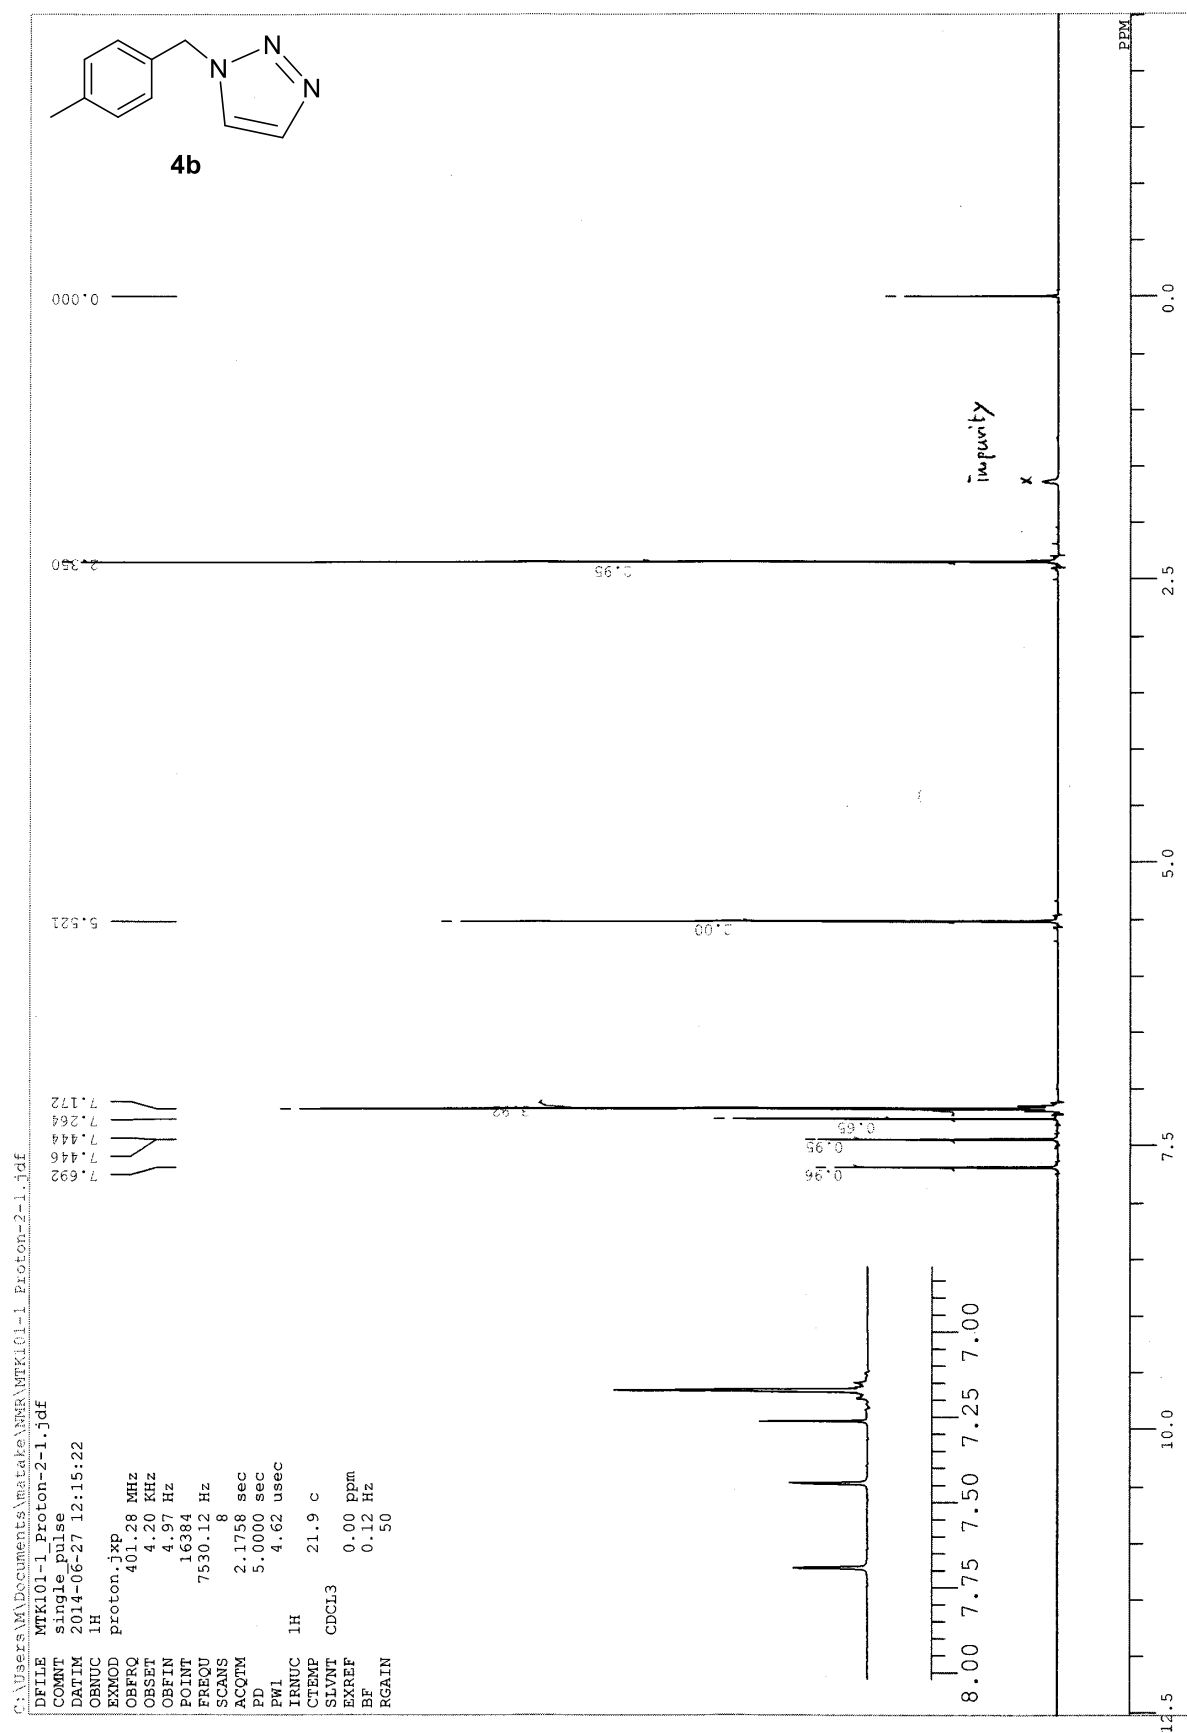

C:\Users\A\Documents\matak\MPK101-1\Carbon-1-1-1.jdf

MPK101-1\Carbon-1-1-1.jdf  
 COMNT single pulse decoupled gated NOE

DATE 2014-06-27 15:03:54

OBNUC 13C

EXMOD carbon.jxp

OBFRQ 100.91 MHz

OBSET 2.56 KHz

OBFIN 8.88 Hz

POINT 32767

FREQ 31565.66 Hz

SCANS 256

ACQTM 1.0381 sec

PD 2.0000 sec

PW1 2.92 usec

IRNUC 1H

CTEMP 22.4 C

SLVNT CDCL3

EXREF 77.00 ppm

BF 1.20 Hz

RGAIN 50

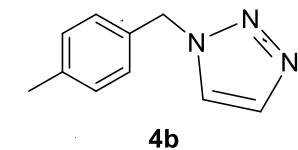

20.769

53.285

76.885  
 77.000  
 77.325

123.121  
 127.675  
 129.146  
 131.456  
 133.718  
 138.148

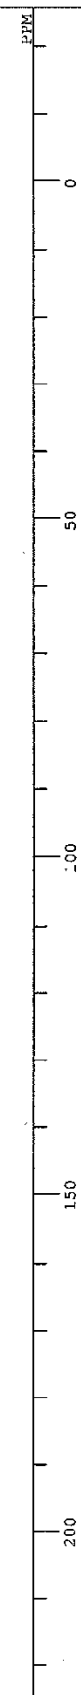





C:\Users\A\Documents\anatake\NMR\NTK102-3 Carbon-1-1.jcf

DFIIE MTK102-3 Carbon-1-1.jdf  
 COMMT single pulse decoupled gated NOE  
 DATIM 2014-06-18 18:48:12

OBNUC 13C  
 EXMOD carbon.jxp  
 OBFRQ 100.91 MHz  
 OBSET 2.56 KHz  
 OBFIN 8.88 Hz  
 POINT 32767  
 FREQU 31565.66 Hz  
 SCANS 256  
 ACQTM 1.0381 sec  
 PD 2.0000 sec  
 PW1 2.92 usec  
 TRNUC 1H  
 CTMP 23.1 c  
 SLVNT CDCL3  
 EXREF 77.00 ppm  
 BF 1.20 Hz  
 RGAIN 50

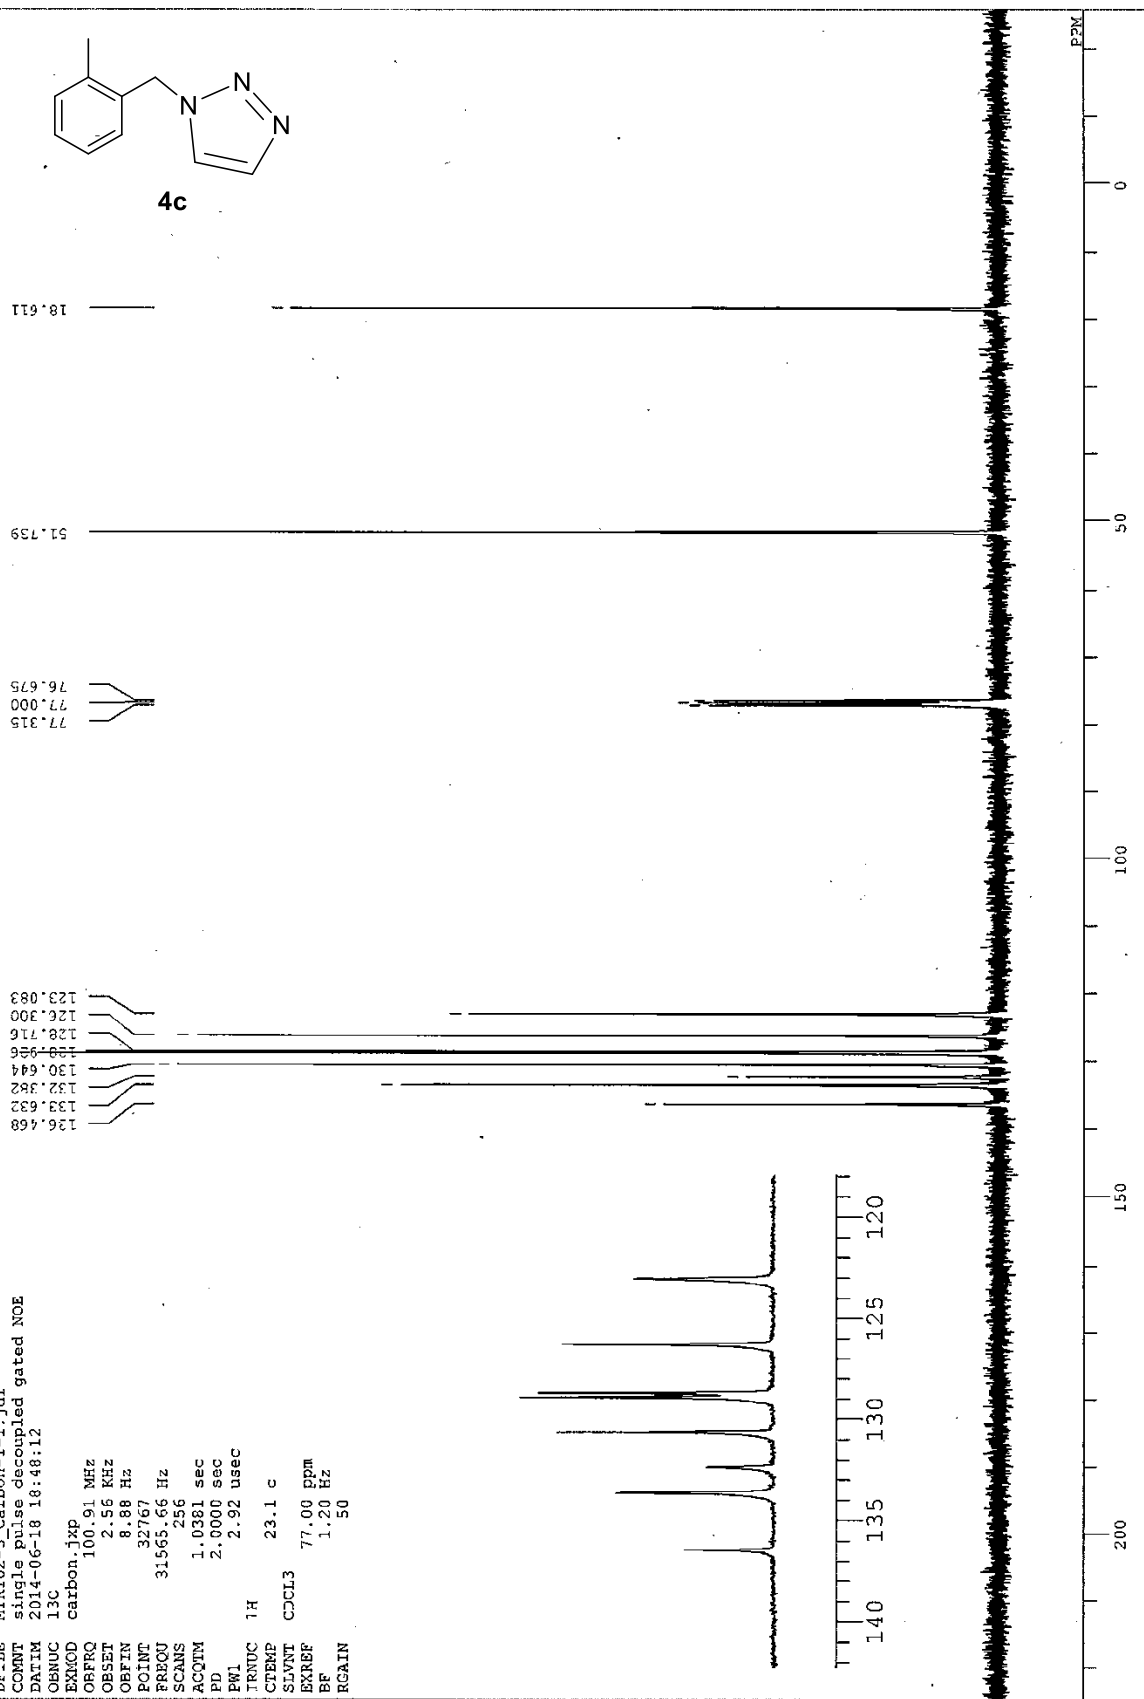

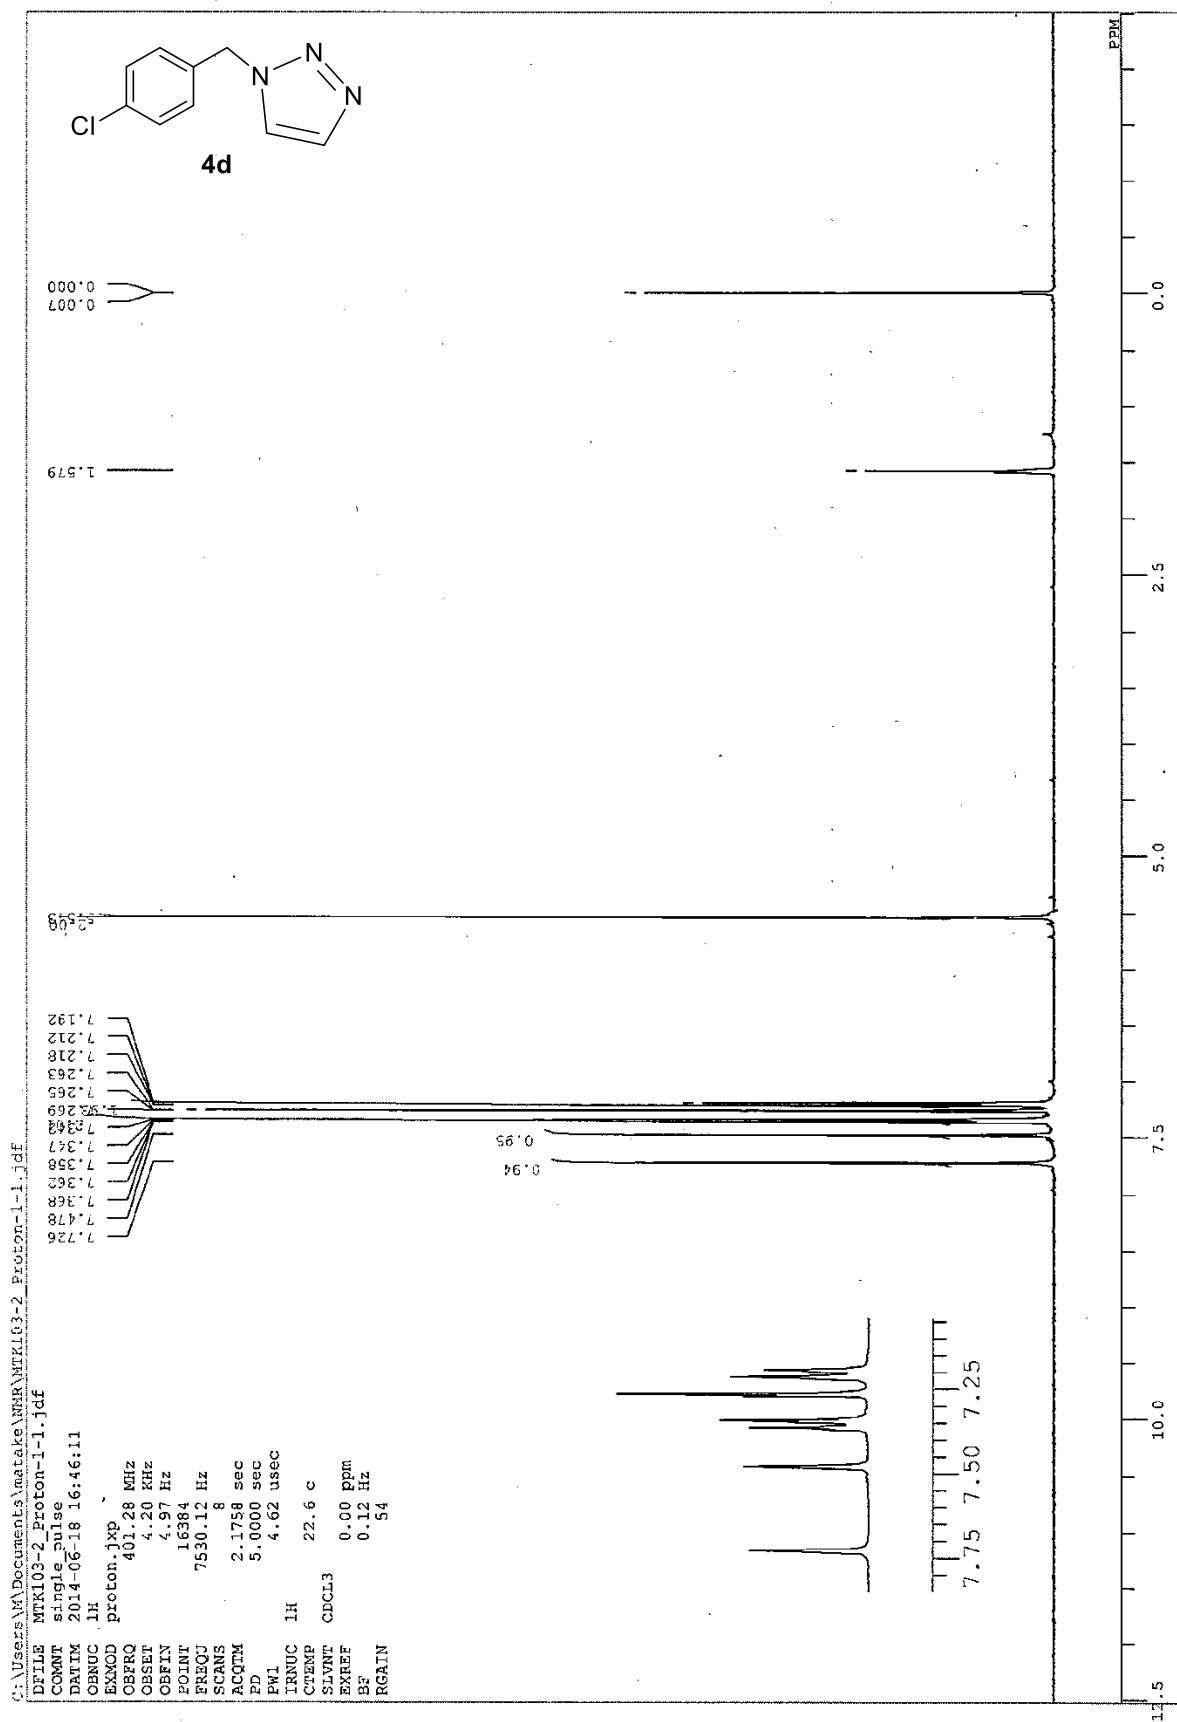

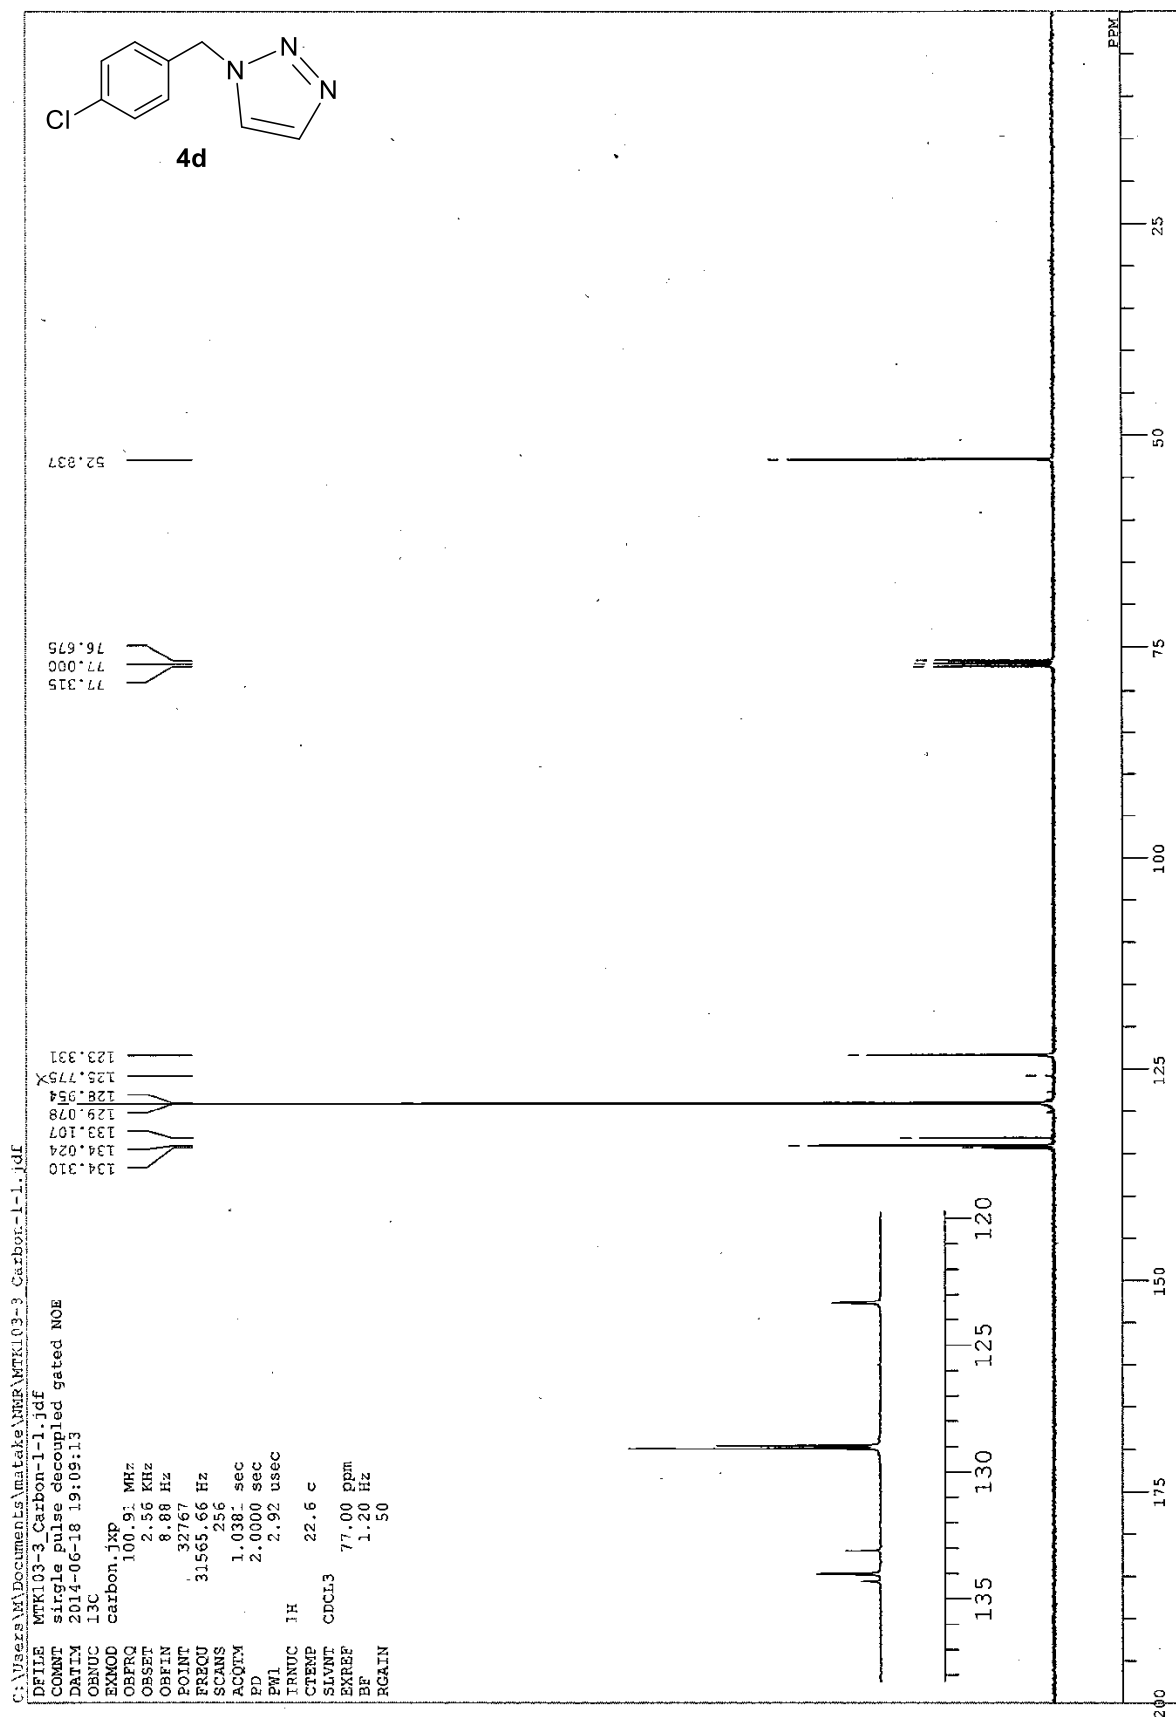



C:\Users\A\Documents\NMR\MTK108-1 Carbon-1-1.jdf

DFILE MTK108-1 Carbon-1-1.jdf  
COMNT single pulse decoupled gated NOE  
DATIM 2014-06-27 15:58:41  
OBNUC 13C  
EXMOD carbon.jxp  
OBPRO 100.91 MHz  
OBSET 2.56 KHz  
OBFIN 8.88 Hz  
POINT 32767  
FREQU 31565.66 Hz  
SCANS 256  
AQTM 1.0381 sec  
PD 2.0000 sec  
FWL 2.92 usec  
IRNUC 1H  
CTEMP 22.5 c  
SIVNT CDCL3  
EXREF 77.00 ppm  
BF 1.20 Hz  
RGAIN 50

50.966

76.675  
77.000  
77.315

123.665  
127.341  
129.623  
129.966  
132.305  
133.136  
133.823

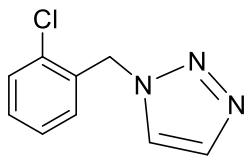

4e

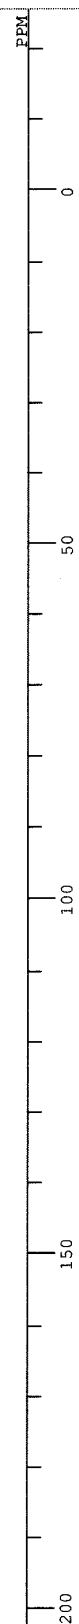

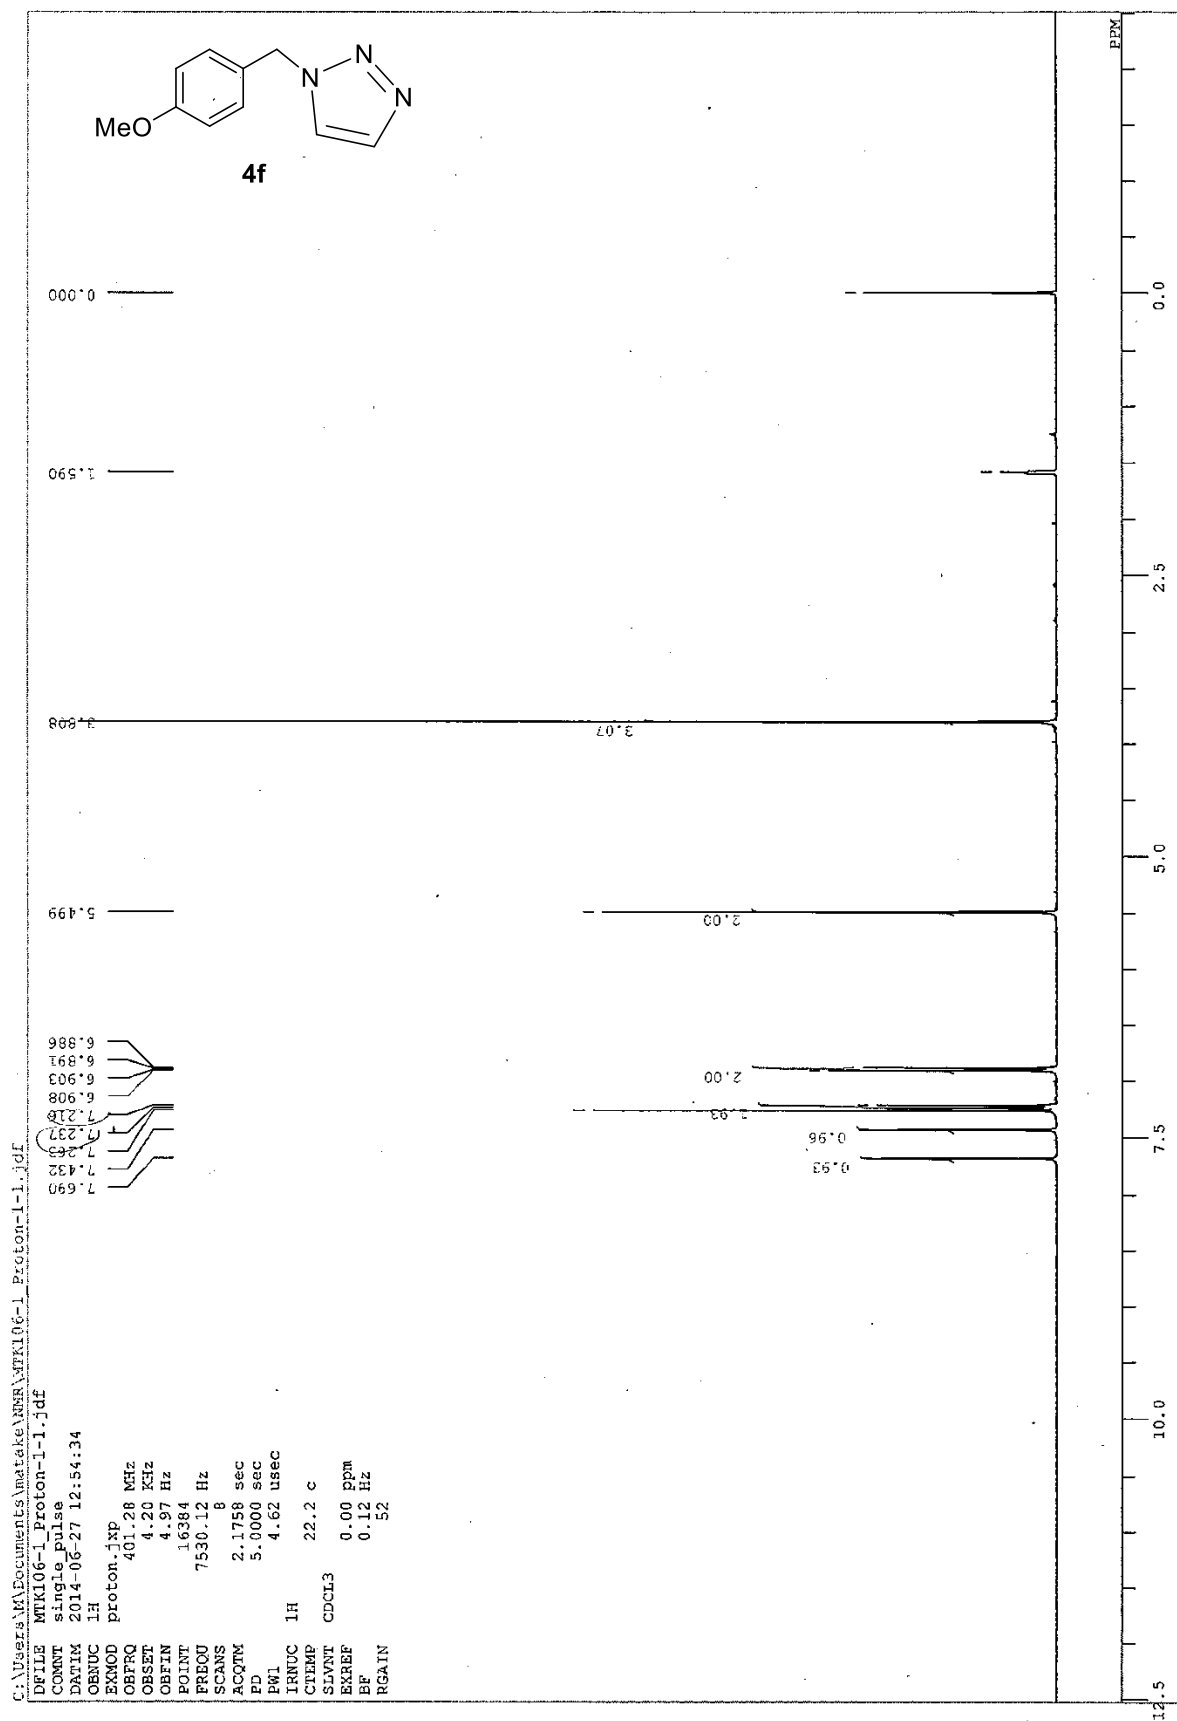





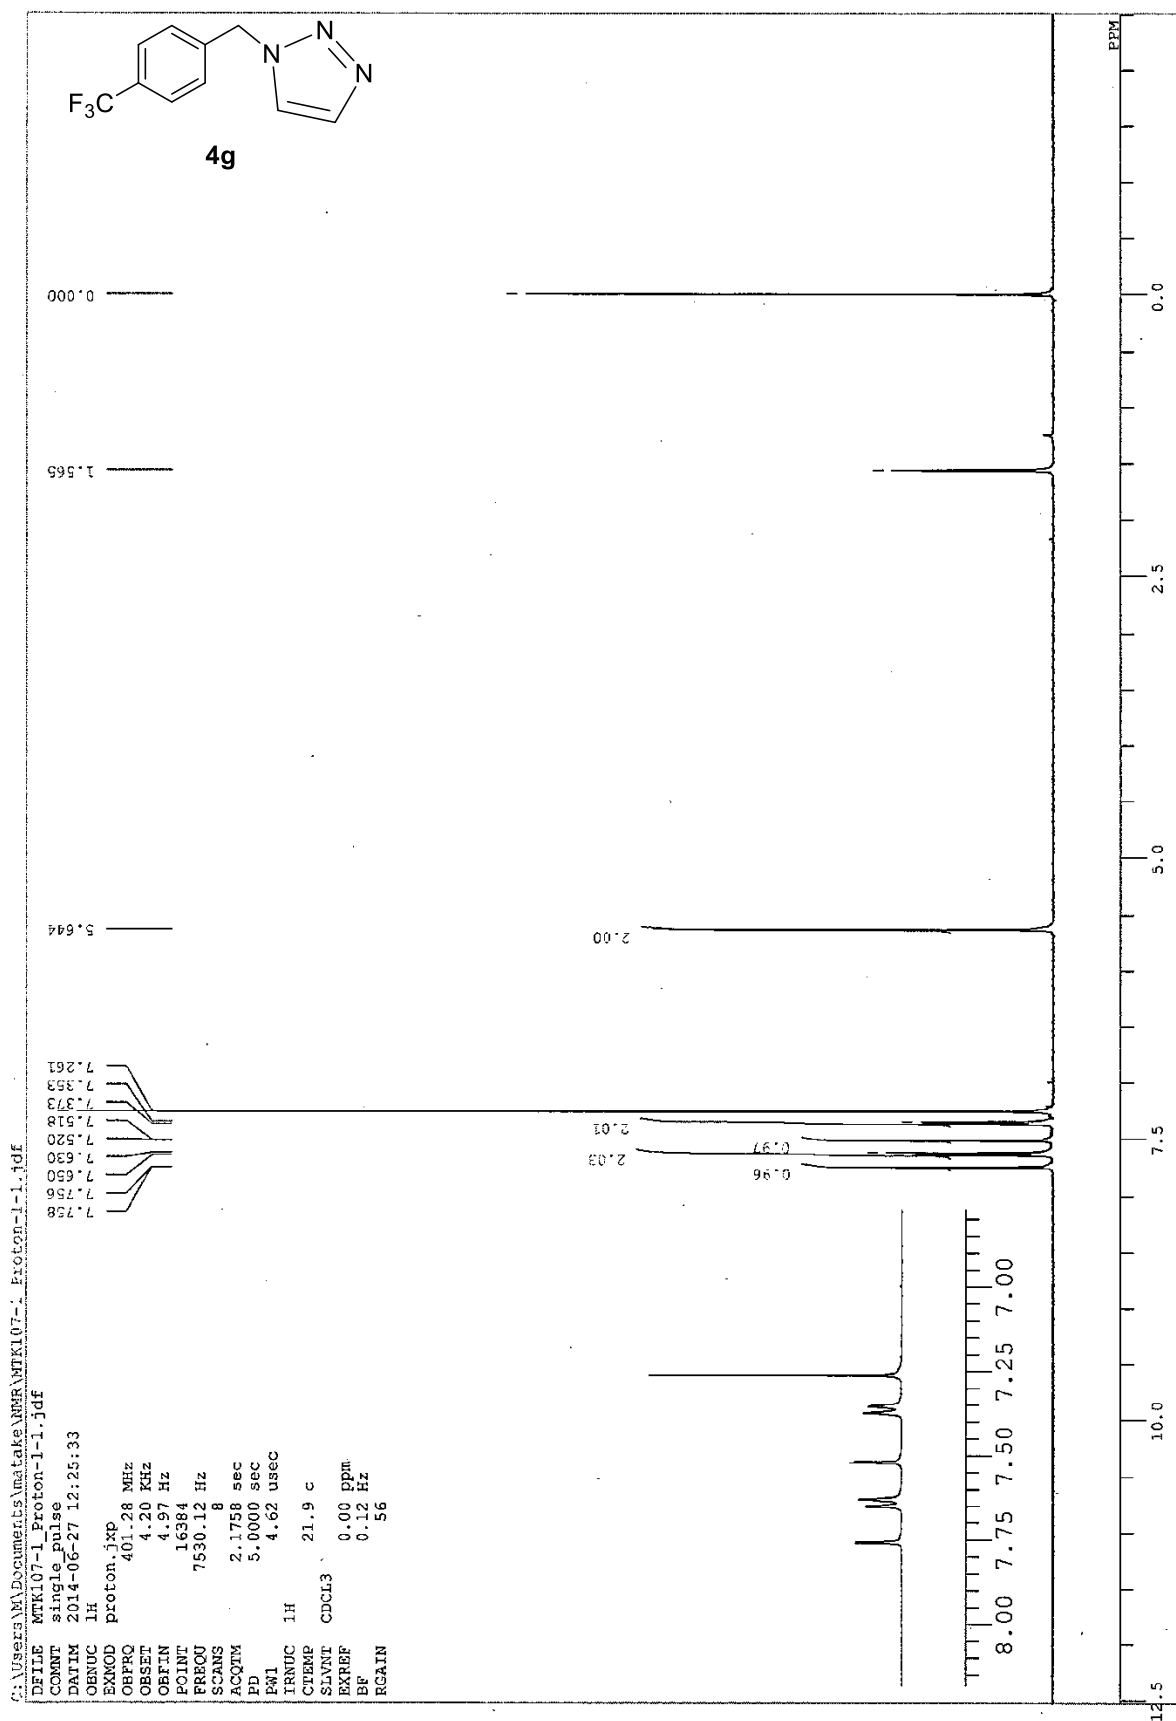

C:\Users\matate\Documents\matate\NMR\MTK107-1\_Carbon-1-1.jdf

DFILE MTK107-1\_Carbon-1-1.jdf  
 COMNT single pulse decoupled gated NOE  
 DATIM 2014-06-27 14:35:51  
 OBSNUC 13C  
 EXMOD carbon.jxp  
 OBPRQ 100.91 MHz  
 OBSET 2.56 KHz  
 OBFIN 8.88 Hz  
 POINT 32767  
 FREQ 31565.66 Hz  
 SCANS 256  
 ACQTM 1.0381 sec  
 PD 2.0000 sec  
 PW1 2.92 usec  
 IRNUC 1H  
 CTEMP 21.9 c  
 SLVNT CDCL3  
 EXREF 77.00 ppm  
 BF 1.20 Hz  
 FGAIN 50

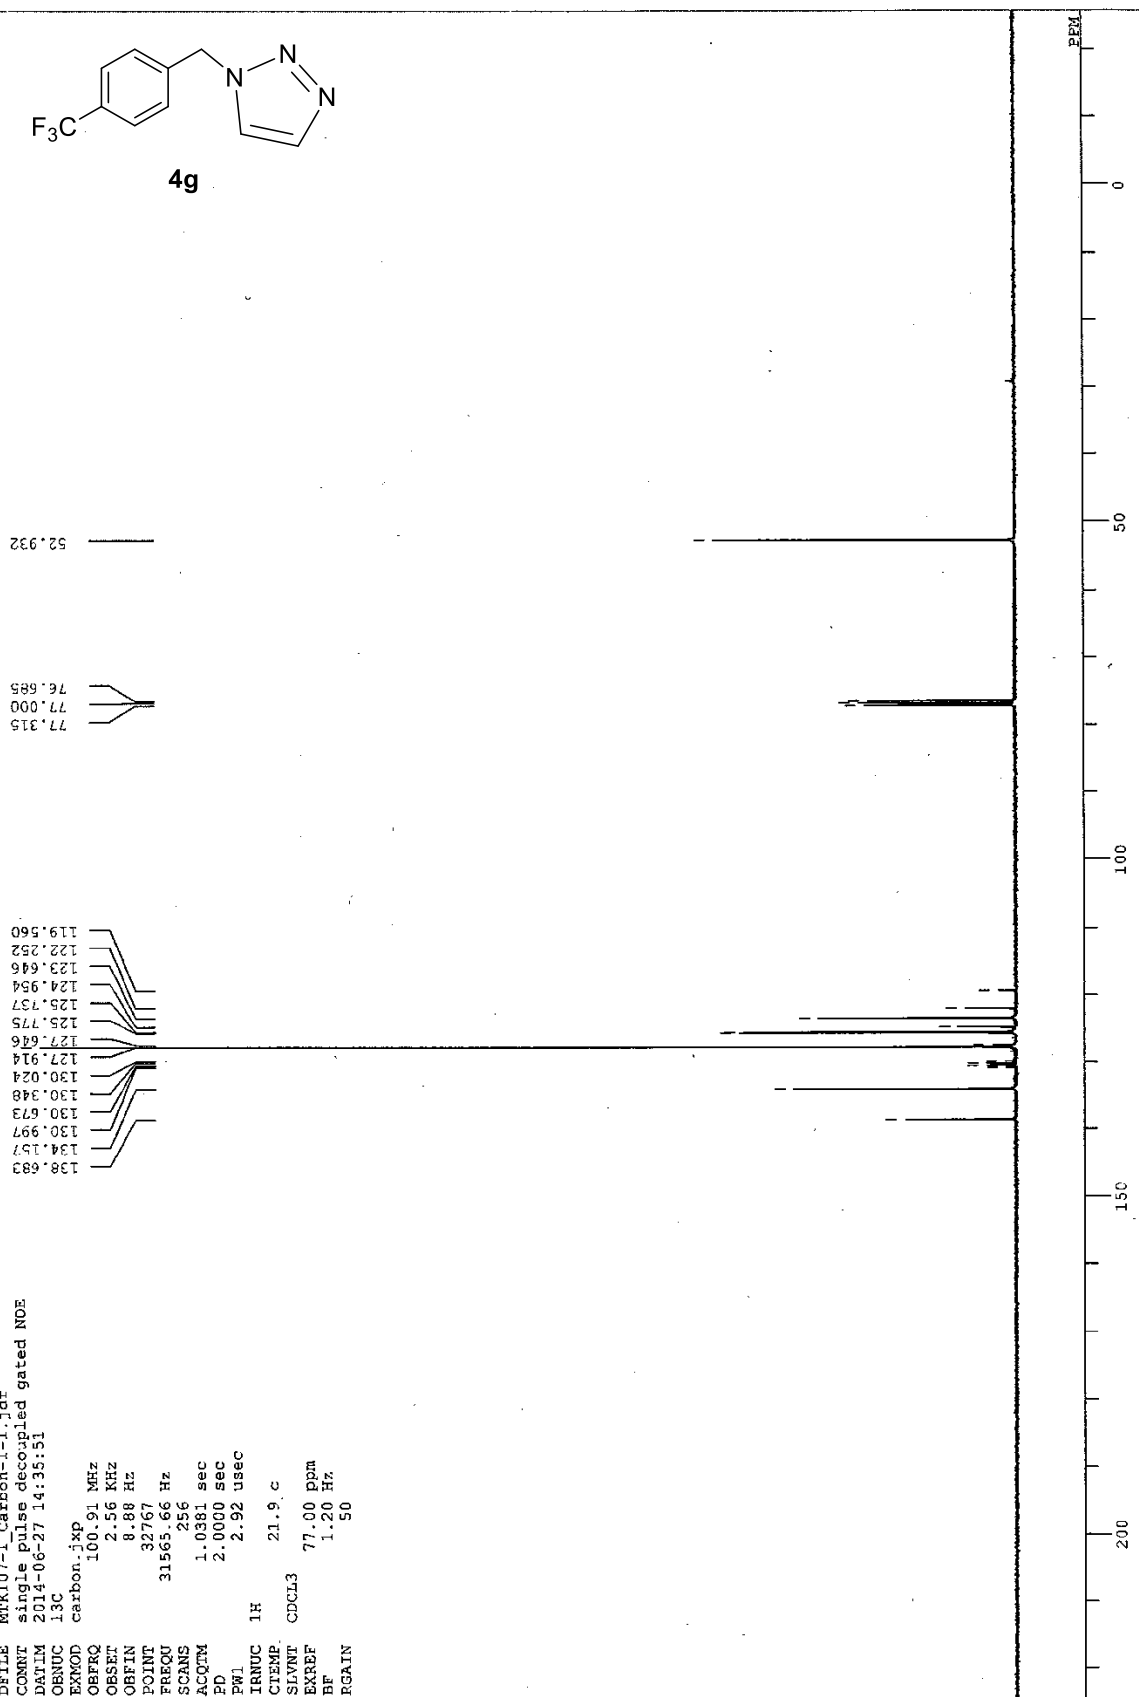



C:\Users\A\Documents\NMR\MTK118-2\_Carbon-1-2\_1.fdf

DFILE MTK118-2\_Carbon-1-2\_1.fdf

COMNT single pulse decoupled gated NOE

DATIM 2014-08-25 15:49:10

CBNUC 13C

EXMOD carbon-1xp

CBFREQ 100.61 MHz

OBSET 2.56 KHz

OBFIN 8.88 Hz

POINT 40960

FREQ 39457.07 Hz

SCANS 256

ACQIM 1.0381 sec

PD 2.0000 sec

FW 2.92 usec

IRNUC 1H

CTEMP 22.7 c

SLVNT CDCL3

EXREF 77.00 ppm

RF 0.12 Hz

RGAIN 50

122.558  
123.198  
125.107  
126.100  
127.930  
127.943  
128.649  
129.661  
129.661  
130.816  
133.594  
133.756

76.673  
77.000  
77.313

51.720

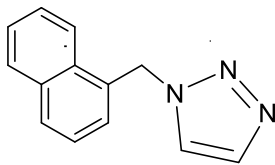

4h

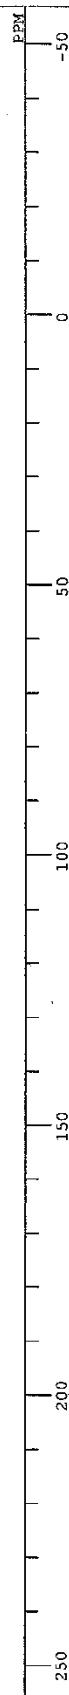



C:\Users\A\Documents\anatake\NMR\MTKI70-1 Carbon-1-1.jdf

FILE MTKI70-1 Carbon-1-1.jdf  
 COMNT single pulse decoupled gated NOE  
 DATIM 2014-12-25 12:45:05  
 OBNUC 13C  
 EXMOD carbon.jxp  
 OBFRQ 100.91 MHz  
 OBSET 2.56 KHz  
 OBFIN 8.88 Hz  
 POINT 32767  
 FREQU 31565.66 Hz  
 SCANS 256  
 ACQTM 1.0381 sec  
 PD 2.0000 sec  
 PW1 2.92 usec  
 IRNUC 1H  
 CTEMP 21.0 c  
 SLVNT CDCL3  
 EXREF 77.00 ppm  
 BF 1.20 Hz  
 RGAIN 50

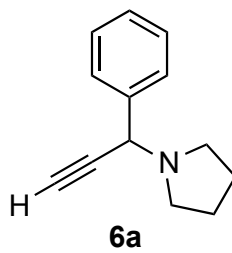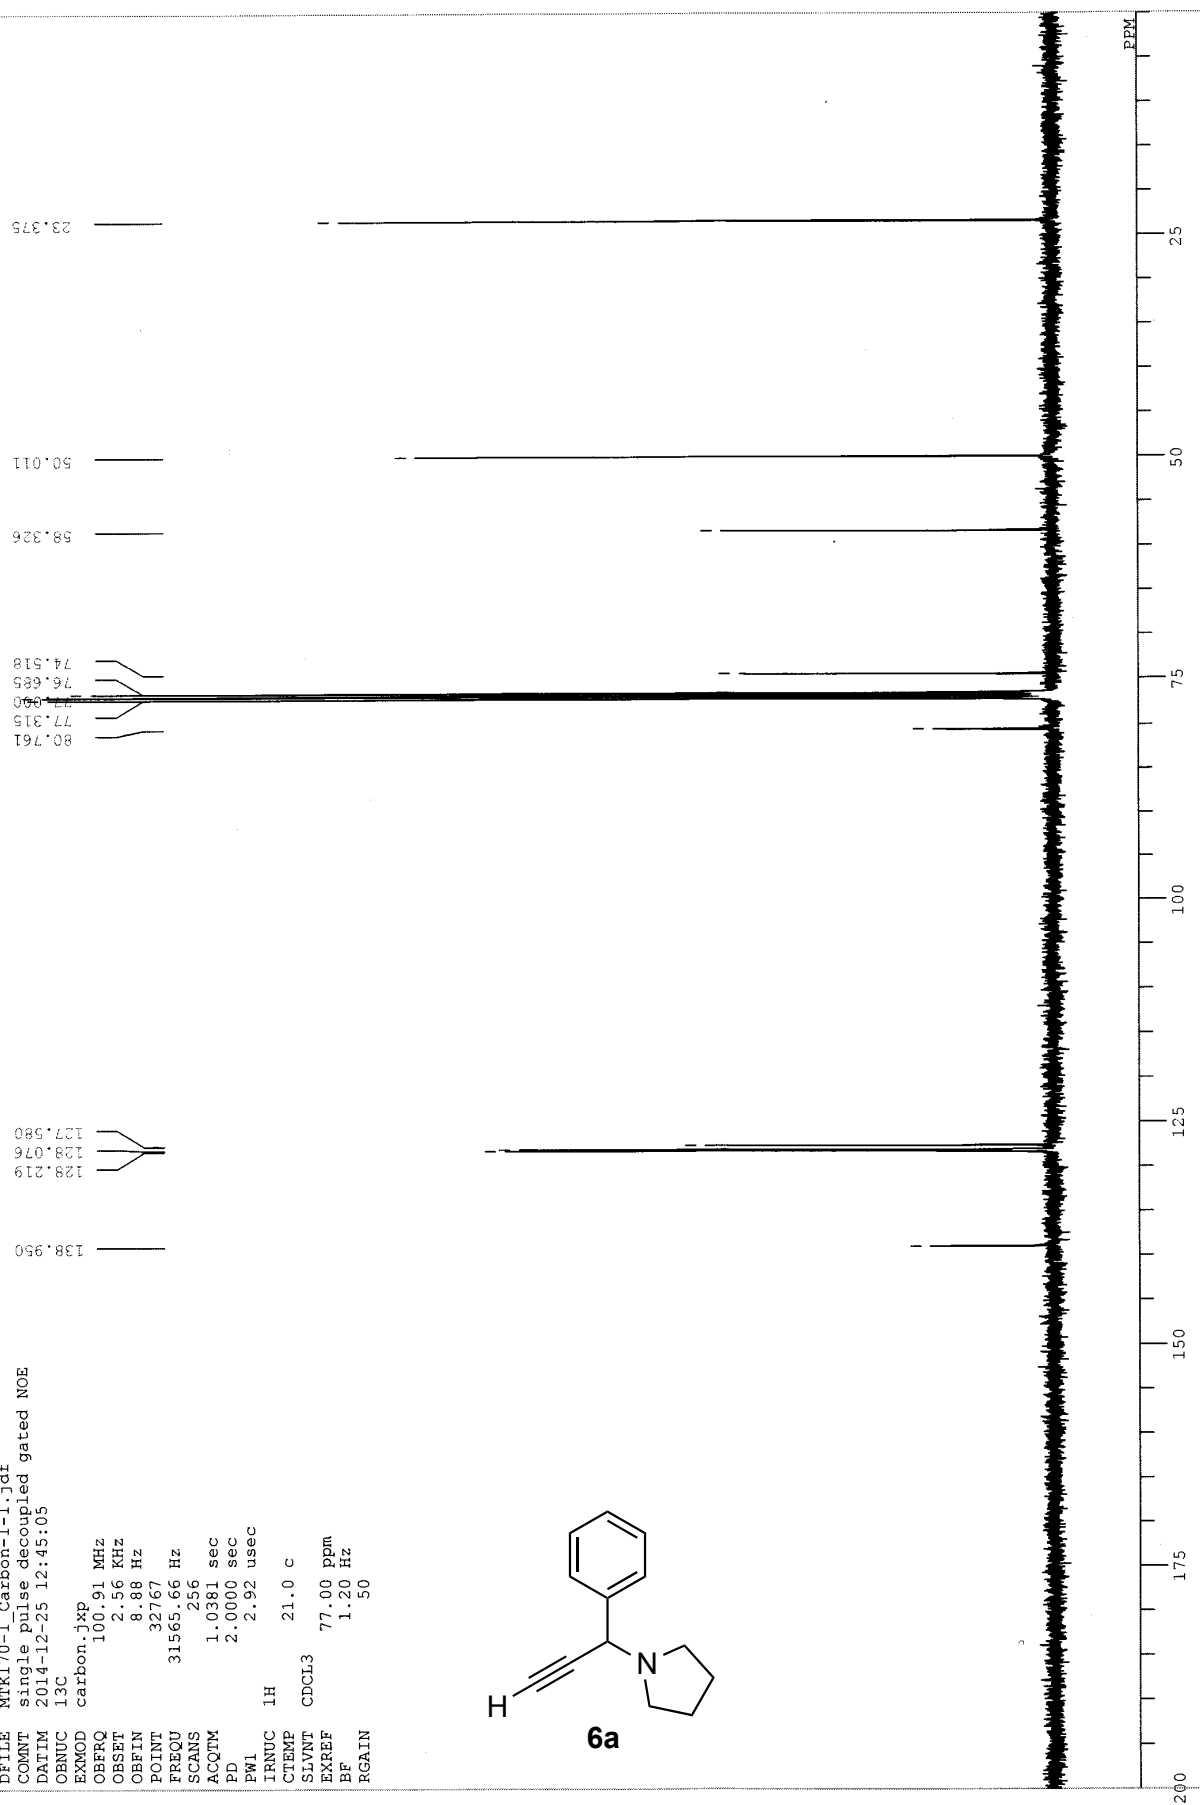

C:\Users\N\Documents\data\NMR\MTK196-1H Proton-1-1.jdf

DELF MTK196-1H Proton-1-1.jdf

COMNT single\_pulse

DATIM 2015-02-12 00:02:05

ORNUC 1H

EXMOD proton.jxp

OBFRQ 401.28 MHz

OBSET 4.20 KHz

OBFIN 4.97 Hz

POINT 16384

FREQ 7530.12 Hz

SCANS 8

ACQTM 2.1758 sec

PD 5.0000 sec

PW1 4.62 usec

IRNUC 1H

CTEMP 20.9 C

SLVNT CDCL3

EXREF 0.00 ppm

BF 0.12 Hz

RGAIN 46

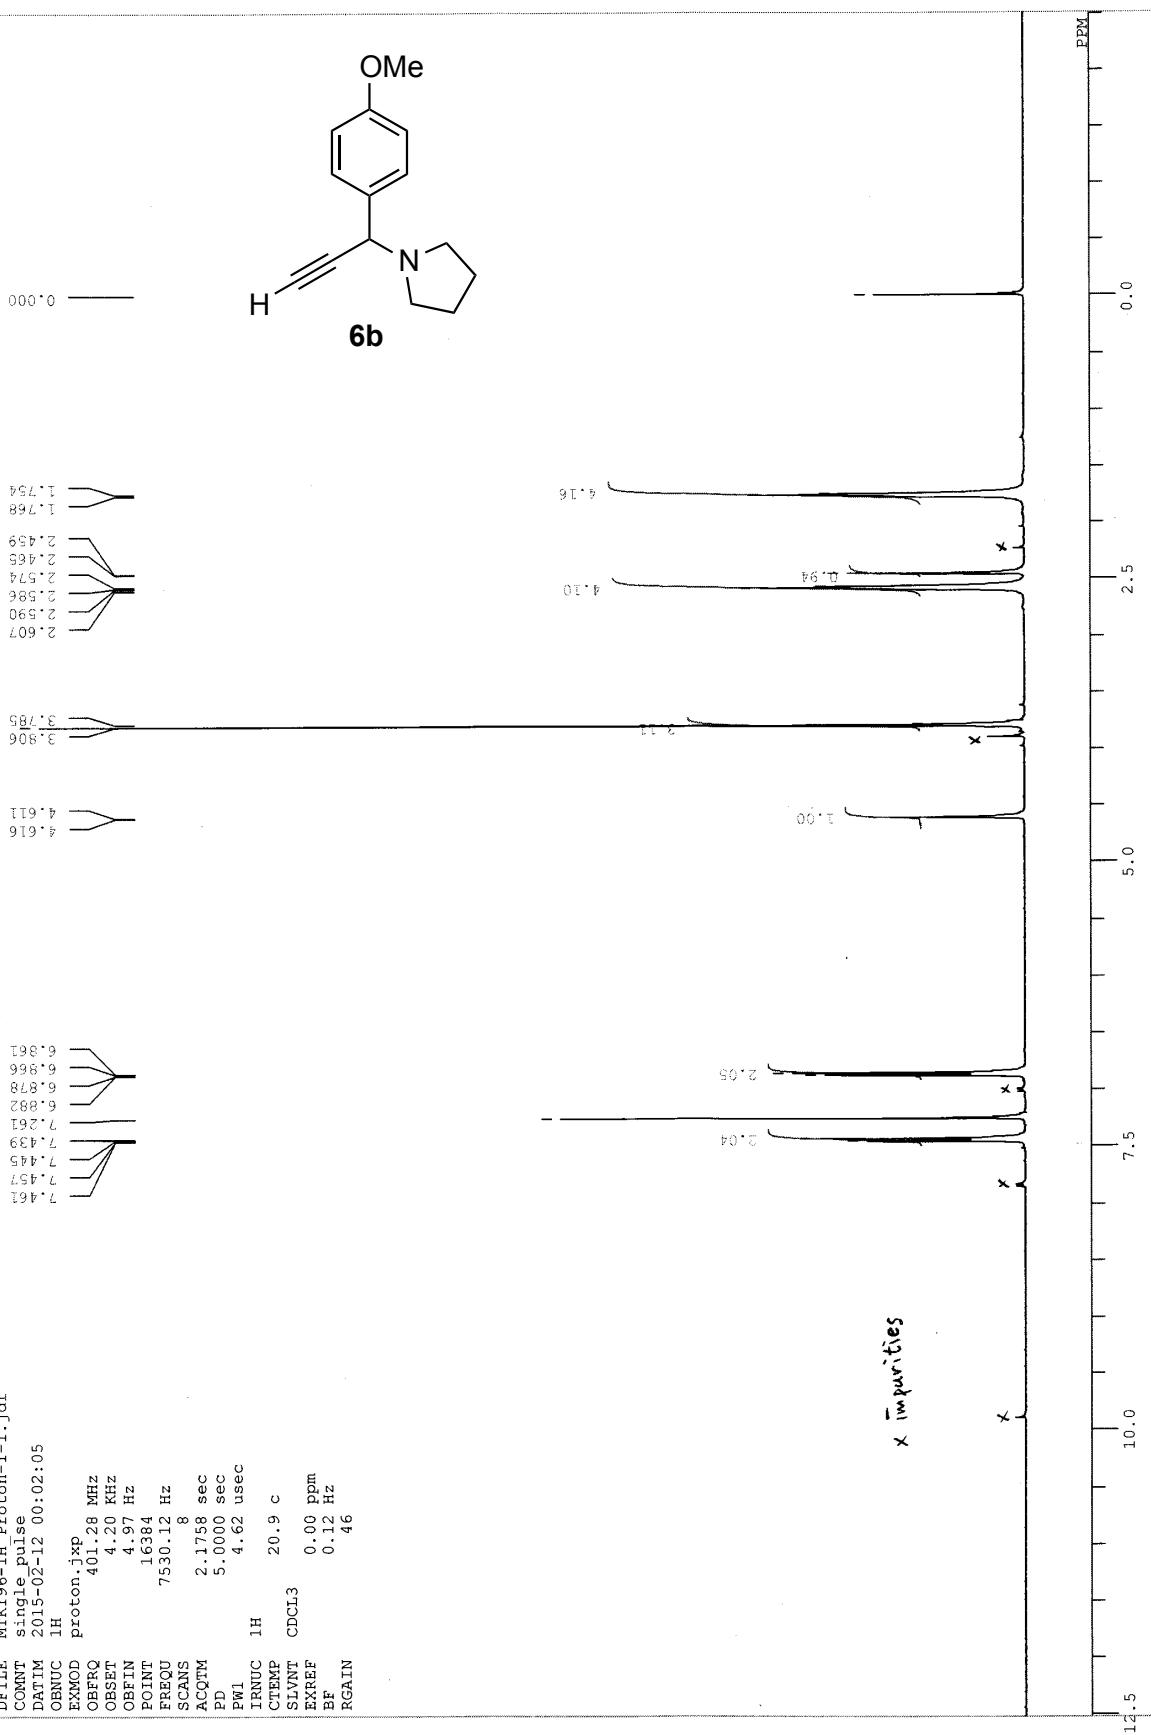

C:\Users\A\Documents\matak\NMR\MTK196-1C\_Carbon-1-1.fdf

DFILE MTK196-1C\_Carbon-1-1.fdf

COMNT single pulse decoupled gated NOE

DATEM 2015-02-12 00:11:43

OBNUC 13C

EXMOD carbon-1xp

OBFRQ 100.91 MHz

OBSET 2.56 kHz

OBFTN 8.88 Hz

POINT 32767

FREQU 31565.66 Hz

SCANS 256

ACQTM 1.0381 sec

PD 2.0000 sec

PW1 2.92 usec

IRNUC 1H

CTEMP 20.9 c

SLVNT CDCL3

EXREF 77.00 ppm

BF 1.20 Hz

RGAIN 50

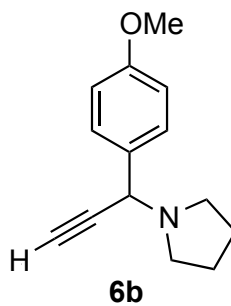

81.029  
77.315  
77.000  
76.685  
74.231

57.639  
55.138  
49.906

131.141  
129.107  
113.450

159.932

23.299





C:\Users\MI\Documents\data\NMR\MTK204-2C Carbon-1-1.jdf

DfFILE MTK204-2C Carbon-1-1.jdf  
 COMNT single pulse decoupled gated NOE  
 DATIM 2015-02-26 15:00:36

OBNUC 13C  
 EXMOD carbon.jxp  
 OBFRQ 100.91 MHz  
 OBSET 2.56 KHz  
 OBFIN 8.88 Hz  
 POINT 32767  
 FREQU 31565.66 Hz  
 SCANS 256  
 ACQTM 1.0381 sec  
 PD 2.0000 sec  
 PW1 2.92 usec  
 IRNUC 1H  
 CTMP 21.4 c  
 SLVNT CDCL3  
 EXREF 77.00 ppm  
 BF 1.20 Hz  
 RGAIN 50

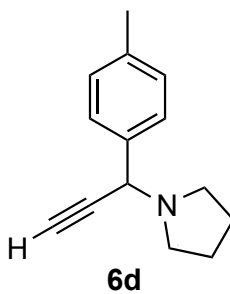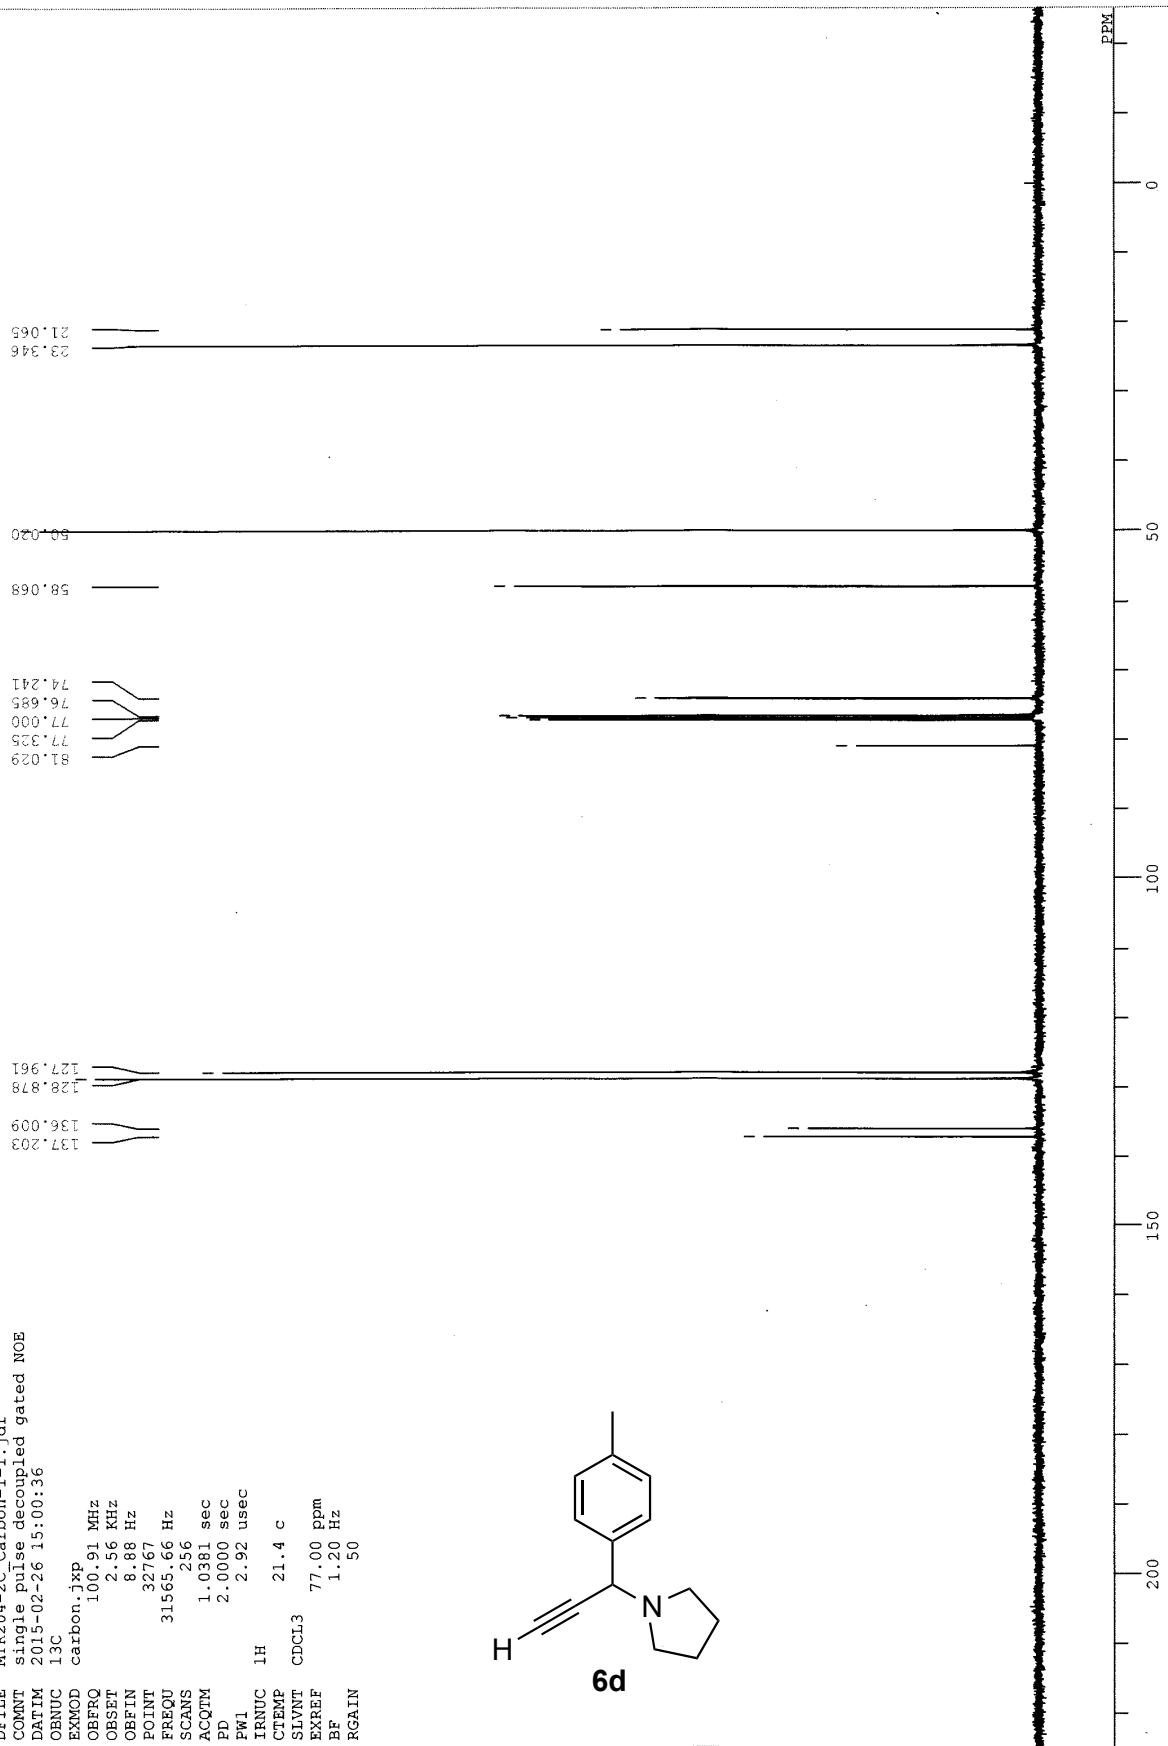

C:\Users\MTK205-2H\Documents\NMR\MTK205-2H Proton-1-1.jdf

DPFILE MTK205-2H Proton-1-1.jdf

COMNT single\_pulse

DATIM 2015-02-26 15:20:26

OBNUC 1H

EXMOD proton.jxp

OBFRQ 401.28 MHz

OBSET 4.20 KHz

POINT 16384

FREQ 7530.12 Hz

SCANS 8

ACQTM 2.1758 sec

PD 5.0000 sec

PW1 4.62 usec

IRNUC 1H

CTEMP 21.2 C

SLVNT CDCL3

EXREF 0.00 ppm

BF 0.12 Hz

RGAIN 46

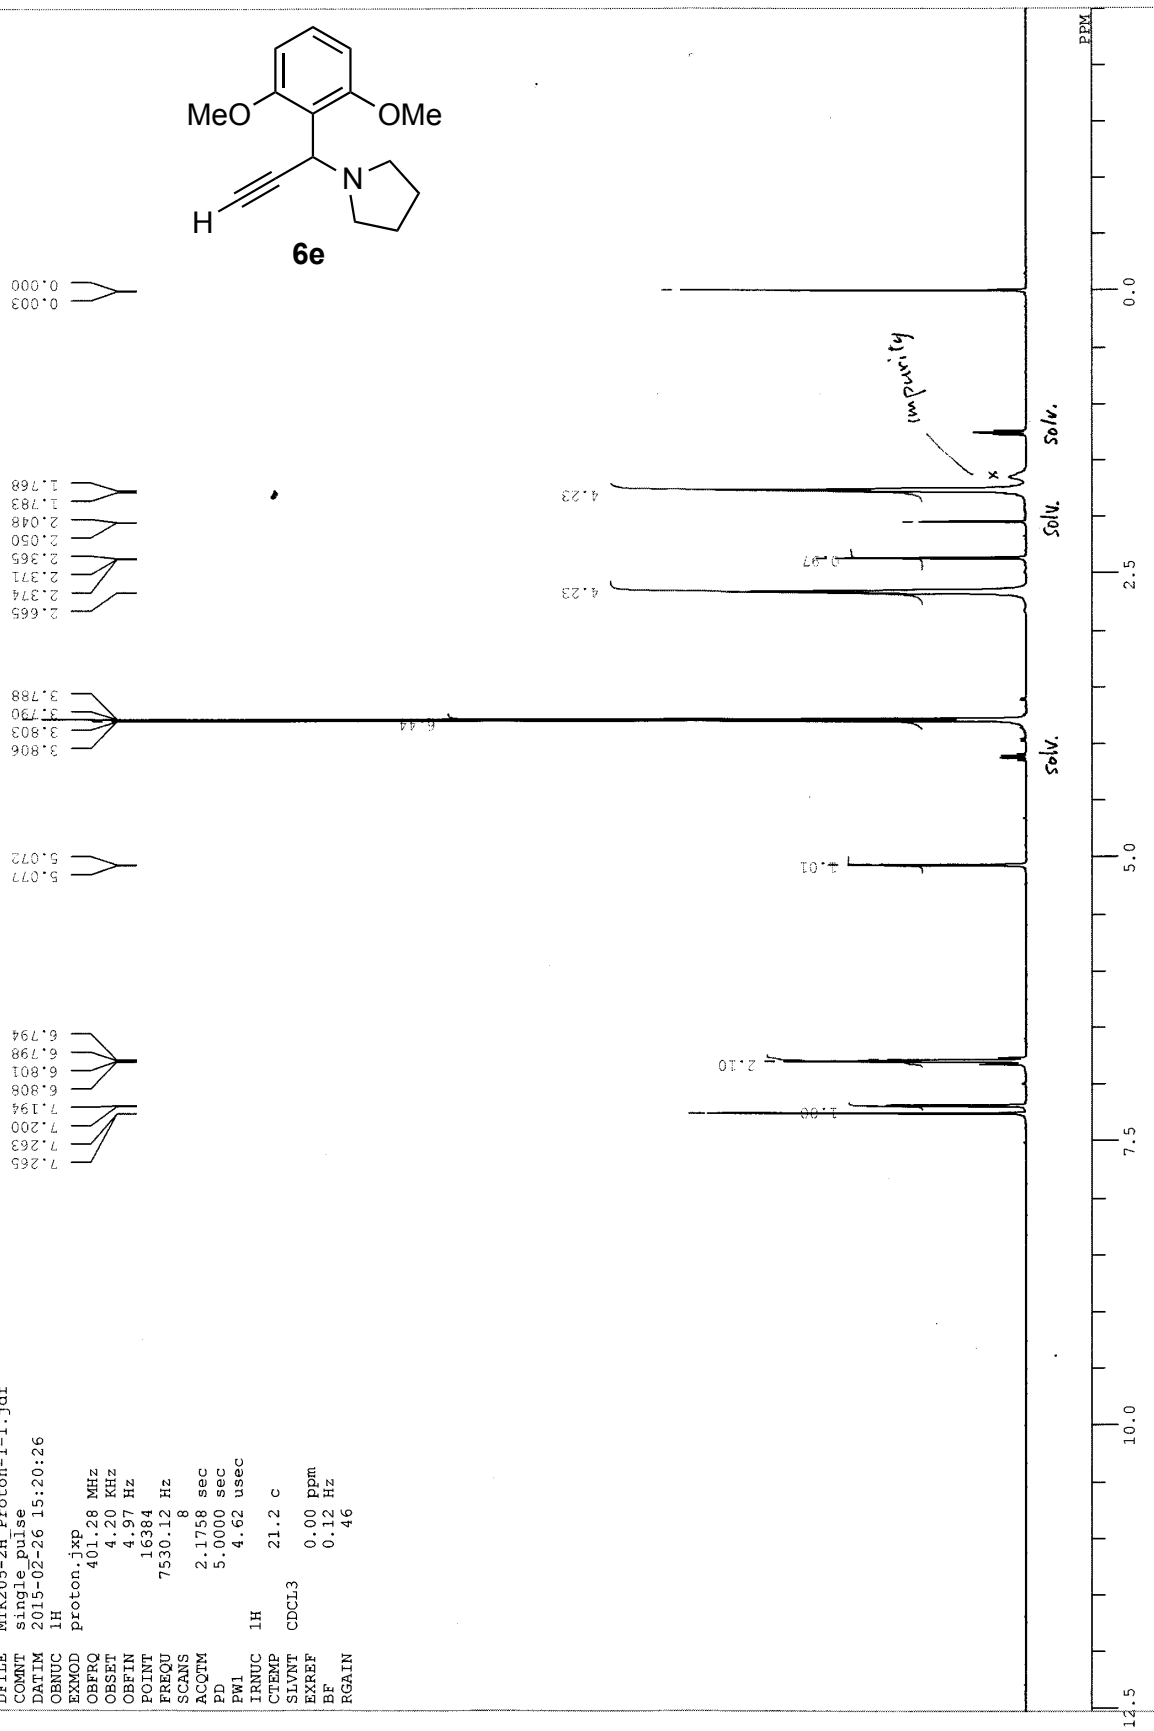

C:\Users\A\Documents\matatek\NMR\MTK205-2C Carbon-1-1.jdf

DFIL MTK205-2C Carbon-1-1.jdf  
 COMNT single pulse decoupled gated NOE  
 DATIM 2015-02-26 15:28:41  
 OBNUC 13C  
 EXMOD carbon.jpg  
 OBFRQ 100.91 MHz  
 OBSET 2.56 KHz  
 OBFIN 8.88 Hz  
 POINT 32767  
 FREQU 31565.66 Hz  
 SCANS 256  
 ACQTM 1.0381 sec  
 PD 2.0000 sec  
 PW1 2.92 usec  
 IRNUC 1H  
 CTMP 21.3 c  
 SLVNT CDCL3  
 EXREF 77.00 ppm  
 BF 1.20 Hz  
 RGAIN 50

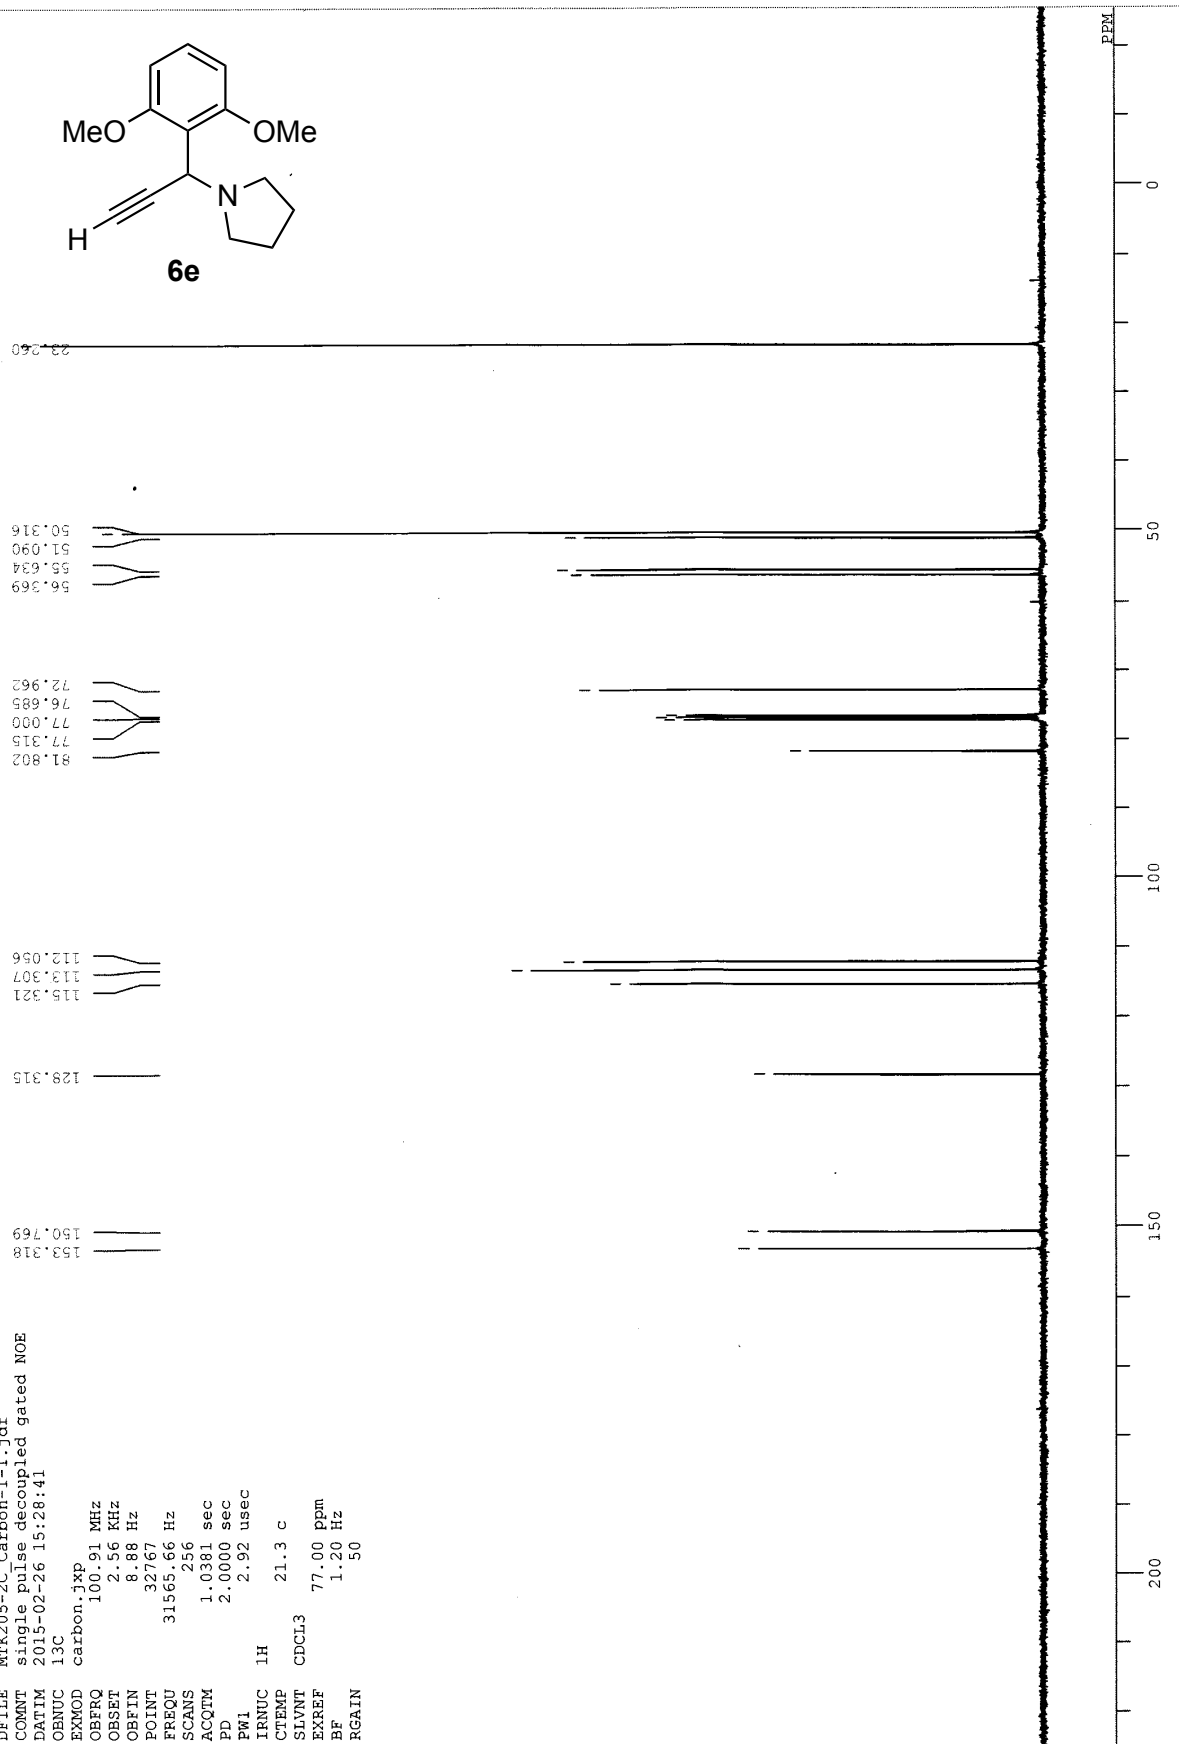

C:\Users\A\Documents\NMR\MTK199-1H Proton-1-1.jdf

DELE MTK199-1H Proton-1-1.jdf

COMNT single pulse

DATIM 2015-02-12 01:25:11

ORNUC 1H

EXMOD proton.jxp

OBFRQ 401.28 MHz

OBSET 4.20 KHz

OBFIN 4.97 Hz

POINT 16384

FREQU 7530.12 Hz

SCANS 8

ACQTM 2.1758 sec

PD 5.0000 sec

PW1 4.62 usec

IRNUC 1H

CTEMP 20.8 c

SLVNT CDCL3

EXREF 0.00 ppm

BF 0.12 Hz

RGAIN 50

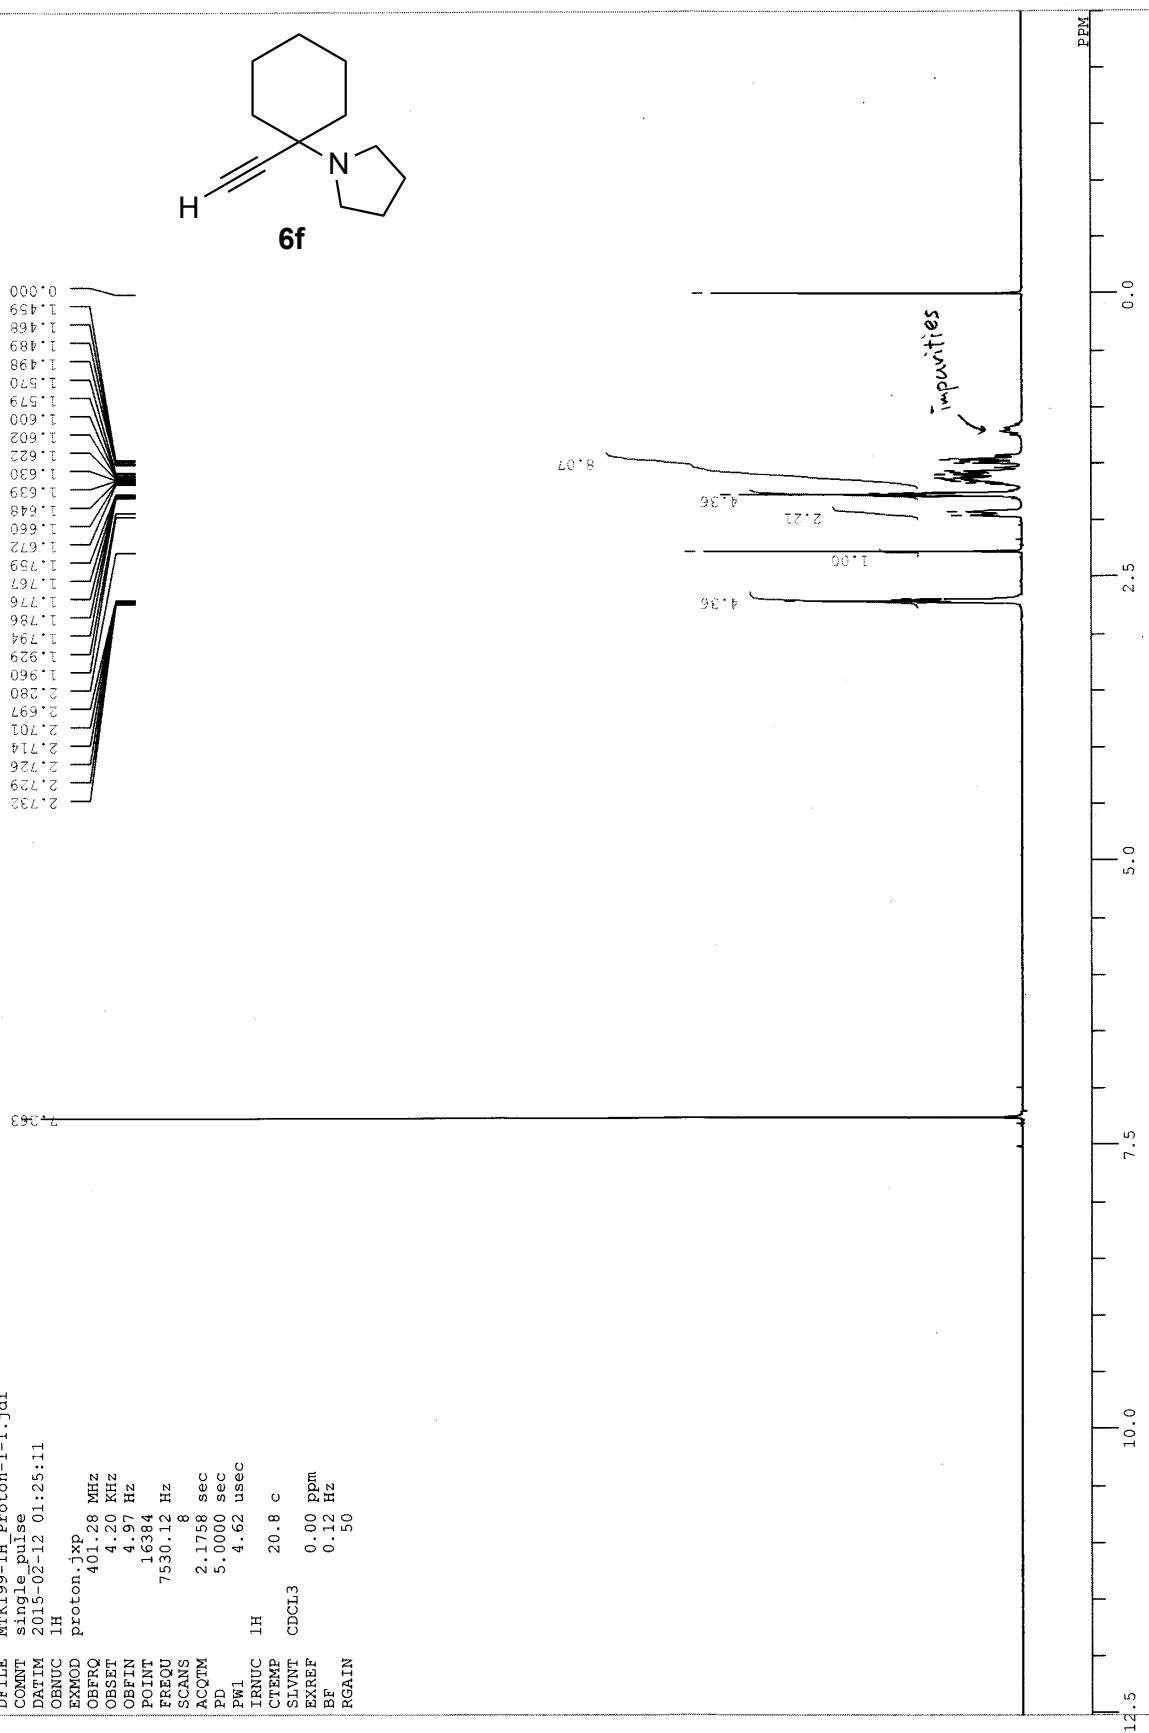

C:\Users\N\Documents\data\NMR\MYK199-1C Carbon-1-1.jdf

DFILE MYK199-1C Carbon-1-1.jdf  
 COMNT single pulse decoupled gated NOE  
 DATIM 2015-02-12 01:35:42  
 OBNUC 13C  
 EXMOD carbon.jxp  
 OBFRQ 100.91 MHz  
 OBSFQ 2.56 KHz  
 OBSFQ 8.88 Hz  
 OBSFQ 32767  
 POINT 31565.66 Hz  
 FREQU 256  
 SCANS 1.0381 sec  
 ACQTM 2.0000 sec  
 PD 2.92 usec  
 PW1 1H  
 IRNUC 20.9 c  
 CTMP CDCL3  
 SLVNT 77.00 ppm  
 EXREF 1.20 Hz  
 Bf 50  
 RGAIN

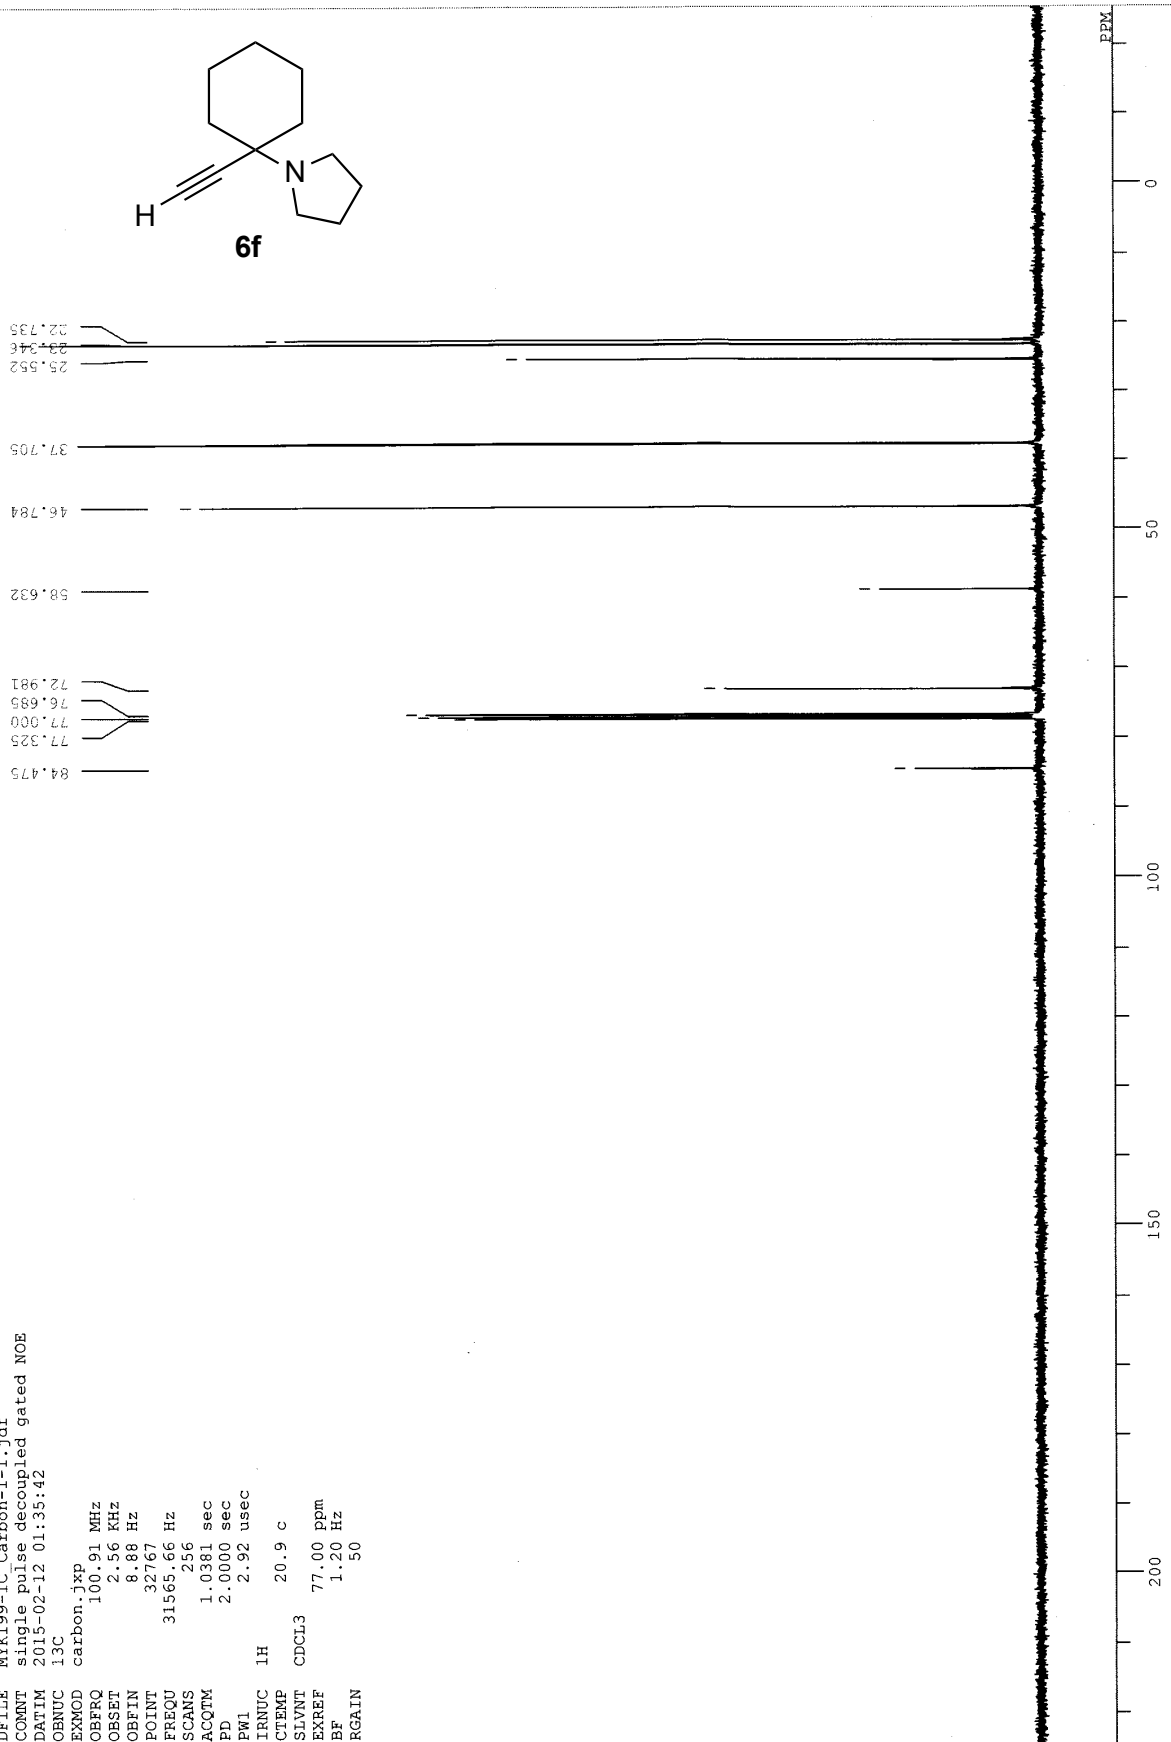

Supplement: Supplementary file 1 [file 3842794]
